# Supplementary material for: AminoxyTMT: A novel Multi-Functional Reagent for Characterization of Protein Carbonylation
Source: Atypon-hosted journal article supplement (doi:10.2144/000114402), 2016-04-01
Supplement: Afiuni-Zadeh_Supple_252531a.pdf [file Afiuni-Zadeh_Supple_252531a.pdf]

## Supplementary Material

# AminoxyTMT: A novel multi-functional reagent for proteomic characterization of protein carbonylation

Somaieh Afiuni-Zadeh<sup>1,2</sup>, John C Rogers<sup>3</sup>, Sergei I Snovida<sup>3</sup>, Ryan D Bomgarden<sup>3</sup>, Timothy J Griffin<sup>2\*</sup>

<sup>1</sup>Department of Laboratory Medicine and Pathology, University of Minnesota, Minneapolis, MN, USA

<sup>2</sup>Department of Biochemistry, Molecular Biology and Biophysics, University of Minnesota, Minneapolis, MN, USA

<sup>3</sup>Thermo Fisher Scientific, Rockford, IL, USA

\*Corresponding author: Dr Timothy J Griffin

| <b>Content</b>                                                                                                                                                                                     | <b>Page</b> |
|----------------------------------------------------------------------------------------------------------------------------------------------------------------------------------------------------|-------------|
| Table S-1. AminoxyTMT labeled, HNE-modified peptides in treated liver mitochondrial with HNE and labeled with aminoxyTMT after enrichment with antiTMT resin                                       | 2           |
| Figure S-1. Peptide sequence match spectra of aminoxyTMT labeled, HNE-modified peptides [HT] in HNE-treated liver mitochondria samples labeled with aminoxyTMT after enrichment with antiTMT resin | 4           |

**Table S-1.** AminoxyTMT labeled, HNE-modified peptides in treated liver mitochondrial after enrichment with antiTMT resin

| Peptide(s)*                                     | Protein                                                          | Gene     | Accession |
|-------------------------------------------------|------------------------------------------------------------------|----------|-----------|
| VAGHPDVVINNAAGNFISPSER                          | 2,4-dienoyl-CoA reductase, mitochondrial                         | Decr1    | Q9CQ62    |
| GAAYSHAE <sup>H</sup> EDSIR                     | 2-hydroxyacyl-CoA lyase 1                                        | Hacl1    | D3Y254    |
| TNVSGGAIALGHPLGGSGSR                            | 3-ketoacyl-CoA thiolase, mitochondrial                           | Acaa2    | Q8BWT1    |
| DSHGVAQVR                                       | 40S ribosomal protein S13                                        | Rps13    | P62301    |
| DHASIQMNVAEVDR                                  | 40S ribosomal protein S21                                        | Rps21    | Q9CQR2    |
| TTHFVEGGDAGNR                                   | 60S ribosomal protein L7                                         | Rpl7     | P14148    |
| VTHAVVTVPAYFNDAQR                               | 78 kDa glucose-regulated protein                                 | Hspa5    | P20029    |
| IVYGH <sup>L</sup> DDPANQEIER                   | Aconitate hydratase, mitochondrial                               | Aco2     | Q99K10    |
| AAH <sup>S</sup> SIDTLGSASAR                    | Acyl-CoA dehydrogenase family member 11                          | Acad11   | Q80XL6    |
| IGGHGAEYGAEALER                                 | Alpha globin 1                                                   | Hba-a1   | Q91VB8    |
| DQSPASHEIATNLGDFALR                             | Alpha-1-antitrypsin 1-4                                          | Serpina1 | Q00897    |
| VLAVNQENEHLMEDYER                               | Alpha-actinin-4 (Fragment)                                       | Actn4    | E9Q2W9    |
| GEVITTYCPANNEPIAR                               | Alpha-aminoadipic semialdehyde dehydrogenase                     | Aldh7a1  | G3UYR8    |
| RDPSVGEHTVEVLR                                  | Alpha-methylacyl-CoA racemase                                    | Amacr    | O09174    |
| DCEDPNPLIR                                      | AP-1 complex subunit beta-1                                      | Ap1b1    | Q55VG5    |
| NEVHTMLGQSTEEIR                                 | Apolipoprotein E                                                 | ApoE     | P08226    |
| AHGGYSV <sup>F</sup> AGVGER; IMDPNIVGNEHYDVAR;  | ATP synthase subunit beta, mitochondrial                         | Atp5b    | P56480    |
| AGPWTPEAAVEHPEAVR; VNEAACDIAR                   | Betaine-homocysteine S-methyltransferase 1                       | Bhmt     | Q35490    |
| VALVCTGSESSITNSQLDAR; HPPETFVDALER              | Bile acyl-CoA synthetase                                         | Slc27a5  | Q4LDG0    |
| KELSEPSSTR; TAHIVLEDGTK                         | Carbamoyl-phosphate synthase [ammonia], mitochondrial            | Cps1     | Q8C196    |
| DASINPPMCLQDVER; MEHLSQEDLLENSR                 | Carboxylesterase 3A                                              | Ces3a    | Q63880    |
| GAGAFGYFEVTHDITR; NFTDVH <sup>P</sup> PDYGAR;   | Catalase                                                         | Cat      | P24270    |
| EDAGEYQCEISNPVSVR                               | CEA-related cell adhesion molecule 1                             | Ceacam   | Q925P3    |
| DNHLAPGQQTTLR                                   | Complement C3                                                    | C3       | P01027    |
| EQAGGDATENFEDVGHSTDAR; FLEEHPGGEEVLR            | Cytochrome b-5, isoform CRA_a                                    | Cyb5     | G5E850    |
| EVESIGAH <sup>L</sup> LNAYSTR; LCTSATESEVTR     | Cytochrome b-c1 complex subunit 1, mitochondrial                 | Uqcrc1   | Q9CZ13    |
| IHEELDTVVGR                                     | Cytochrome P450 1A2                                              | Cyp1a2   | P00186    |
| VHEEIDR                                         | Cytochrome P450 2A12                                             | Cyp2a12  | P56593    |
| VQEEAQCLVEELR                                   | Cytochrome P450 2C29                                             | Cyp2c29  | Q3UT49    |
| EALVDHGDVFAGR                                   | Cytochrome P450 2C54                                             | Cyp2c54  | Q6XVG2    |
| EHQDSLDPNSPR                                    | Cytochrome P450 2F2                                              | Cyp2f2   | P33267    |
| EAFIDHGEFSGR                                    | Cytochrome P450, family 2, subfamily c, polypeptide 67           | Cyp2c67  | Q569X9    |
| ALSQHP <sup>T</sup> VNDDLPLNR                   | Dimethylaniline monooxygenase [N-oxide-forming] 5                | Fmo5     | P97872    |
| LEEETGQVVGFHQPGSIR                              | Dimethylglycine dehydrogenase, mitochondrial                     | Dmgdh    | Q9DBT9    |
| YHVPVVVPEGSTSDTQEAILR                           | Dolichyl diphosphooligosaccharide- glycosyltransferase subunit 2 | Rpn2     | A2ACG7    |
| HFD <sup>E</sup> TVNR, VTAEVVLVHPGGGSTS         | Dolichyl-diphosphooligosaccharide- glycosyltransferase subunit 1 | Rpn1     | Q91YQ5    |
| VNDEHPAYLASDEITTVR                              | Dynamin-like 120 kDa protein, mitochondrial                      | Opa1     | H7BX01    |
| GIHVEIPGAQAE <sup>L</sup> GLPQVAR               | Electron transfer flavoprotein subunit beta                      | Etfb     | Q9DCW4    |
| SNPVHEIQSLDEVTLNDR; TPADCPVIAID <sup>S</sup> FR | Endoplasmic reticulum resident protein 44                        | Erp44    | Q9D1Q6    |

|                                                      |                                                                   |         |        |
|------------------------------------------------------|-------------------------------------------------------------------|---------|--------|
| EGYL <u>H</u> IGGTTQQAQR                             | Expressed sequence AU018778                                       | Ces1f   | Q91WU0 |
| IADQC <u>P</u> SSLAIQENANALAR                        | Fructose-bisphosphate aldolase B                                  | Aldob   | Q91Y97 |
| DSNYHLLMSVQESLER; <u>H</u> GGTIPVVPTAEFQDR           | Glutamate dehydrogenase 1, mitochondrial                          | Glud1   | P26443 |
| TQVEQ <u>C</u> EPTNDAVR                              | Glycogen [starch] synthase, liver                                 | Gys2    | Q8VCB3 |
| STAGDT <u>H</u> LGGEDFDNR                            | Heat shock cognate 71 kDa protein                                 | Hspa8   | P63017 |
| NAN <u>C</u> SIEESFQR                                | Hydroxymethylglutaryl-CoA lyase, mitochondrial                    | Hmgcl   | P38060 |
| VIGHDEDASAPTGVVR                                     | Immunity-related GTPase family M member 1 (Fragment)              | Irgm1   | Q5NCB5 |
| TVEAEAA <u>H</u> GTVTR                               | Isocitrate dehydrogenase [NADP] cytoplasmic                       | Idh1    | O88844 |
| ADGTVLE <u>C</u> SESSNADVFQAAR; VVA <u>H</u> YPVEVR  | L-gulonolactone oxidase                                           | Gulo    | P58710 |
| VIGSG <u>C</u> NLDSAR                                | L-lactate dehydrogenase                                           | Ldha    | G5E8N5 |
| NHNDLNSVPQEPYR                                       | Lysosomal alpha-glucosidase (Fragment)                            | Gaa     | F6R5R5 |
| DEE <u>C</u> SELSMVADK; INGEW <u>H</u> TIILASDK      | Major urinary protein 1                                           | Mup7    | Q58EV3 |
| DFTP <u>V</u> CTTELGR                                | MCG48959; Peroxiredoxin 6                                         | Prdx6b  | Q8BG37 |
| WIDI <u>H</u> NPATNEVVGR                             | Methylmalonate-semialdehyde dehydrogenase [acylating]             | Aldh6a1 | Q9EQ20 |
| EIAGAT <u>P</u> HITAAEGR; GIEQAVQ <u>S</u> HAVAEEEAR | Mitochondrial inner membrane protein                              | Immt    | E9Q800 |
|                                                      |                                                                   |         |        |
| NYPEG <u>H</u> QAAAVLPVLDLAQR                        | NADH dehydrogenase [ubiquinone] flavoprotein 2, mitochondrial     | Ndufv2  | Q9D6J6 |
| EV <u>H</u> PDIDSER                                  | Peroxisomal acyl-coenzyme A oxidase 2                             | Acox2   | Q9QXD1 |
| <u>H</u> VLQQFADNDVSR                                | Peroxisomal multifunctional enzyme type 2                         | Hsd17b4 | P51660 |
| ED <u>C</u> TQPDYEATSR                               | Probable proline dehydrogenase 2                                  | Prodh2  | Q8VCZ9 |
| G <u>H</u> PDLQGPADDIFESIGDR;                        | Protein ERGIC-53                                                  | Lman1   | Q9D0F3 |
| NQQEGV <u>C</u> PEGSIDNSPVK                          | Protein Gm20425; Peroxiredoxin 6                                  | Gm2042  | E9Q035 |
| ADFAQA <u>C</u> QDAGVR; DA <u>H</u> QSLLATR;         | Pyruvate carboxylase                                              | Pcx     | G5E8R3 |
| NIDE <u>H</u> ANEDVER                                | Ras-related protein Rab-10                                        | Rab10   | P61027 |
| YLDEDTVY <u>H</u> LQPSGR                             | S-adenosylmethionine synthase isoform type-1                      | Mat1a   | Q91X83 |
| D <u>H</u> DASVYLR; NYSVVFP <u>H</u> DEPLAGR         | Sarcosine dehydrogenase, mitochondrial                            | Sardh   | Q99LB7 |
| SGYQQAASE <u>H</u> GLVVIAPDTSPR                      | S-formylglutathione hydrolase                                     | Esd     | H3BLJ9 |
| SGGGGSSGAGGG <u>P</u> SGTSSSR                        | Signal peptidase complex subunit 2                                | Spcc2   | Q9CYN2 |
| SA <u>H</u> AGTYEVR                                  | Signal sequence receptor, delta                                   | Ssr4    | Q9D8L3 |
| <u>H</u> VLGVPLDDR                                   | Solute carrier family 2, facilitated glucose transporter member 2 | Slc2a2  | E9PXR7 |
| NDISS <u>H</u> PPVEGSYAPR; SS <u>H</u> YDELLAAEAR    | Staphylococcal nuclease domain-containing protein 1               | Snd1    | Q78PY7 |
| GAA <u>A</u> HPDSEEQQQR                              | Talin-1                                                           | Tln1    | P26039 |
| D <u>H</u> DTFLAVR                                   | Vesicular integral-membrane VIP36                                 | Lman2   | Q9DBH5 |

\*Underlined amino acid in each peptide sequence are modified with HNE and labeled with aminoxyTMT. All peptides shown were identified at >90% Confidence using the ProteinPilot sequencing database searching program.

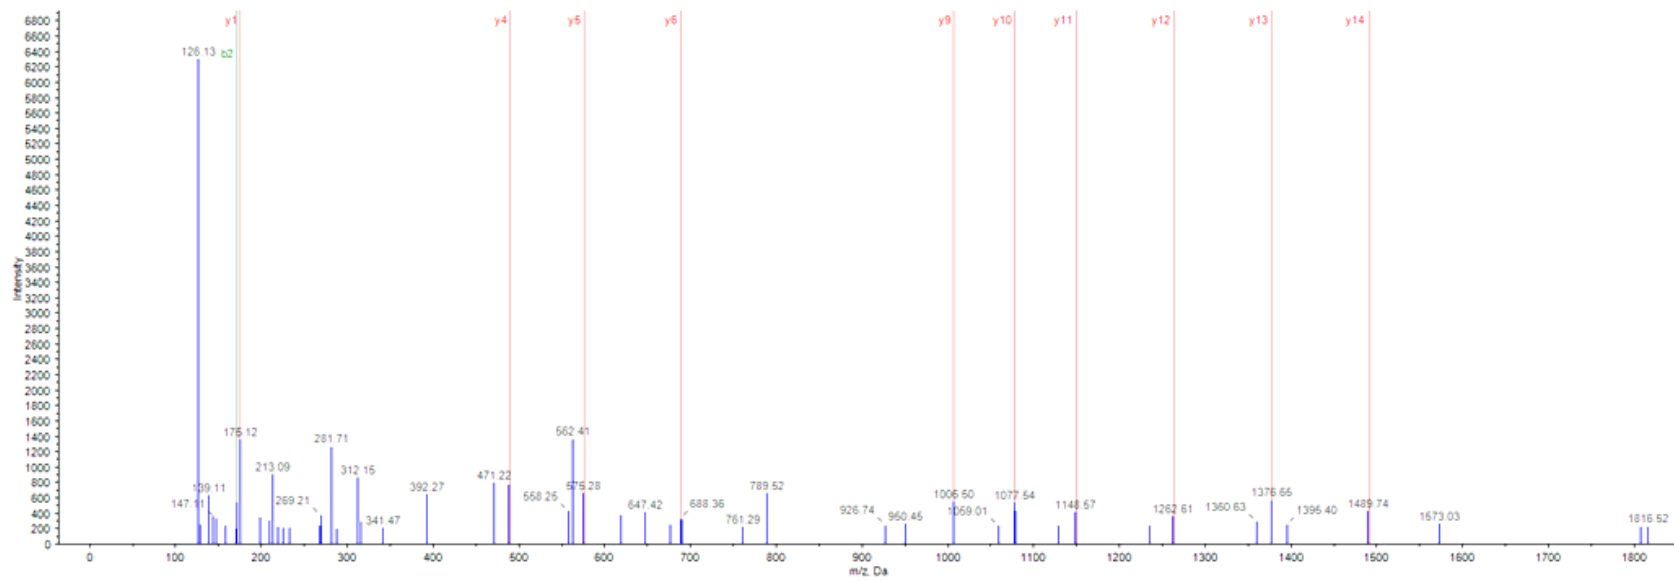

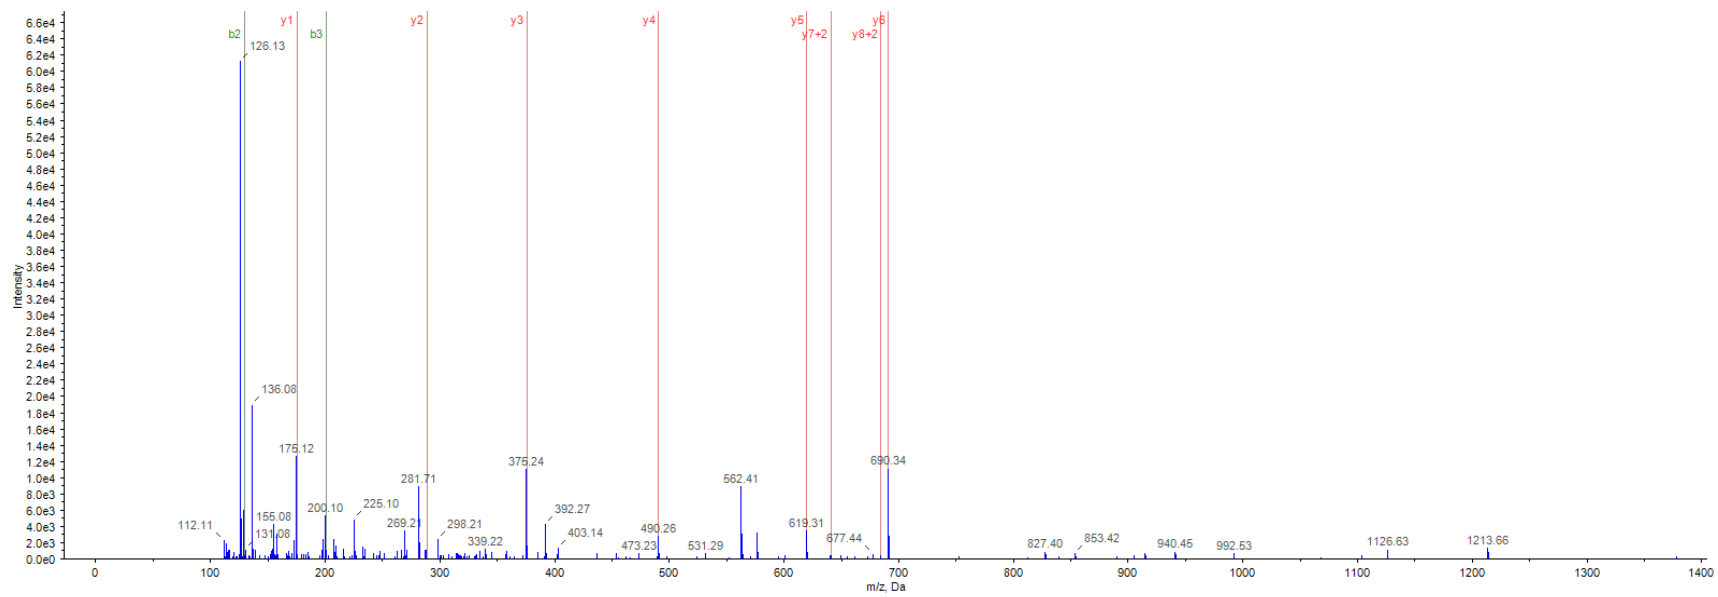

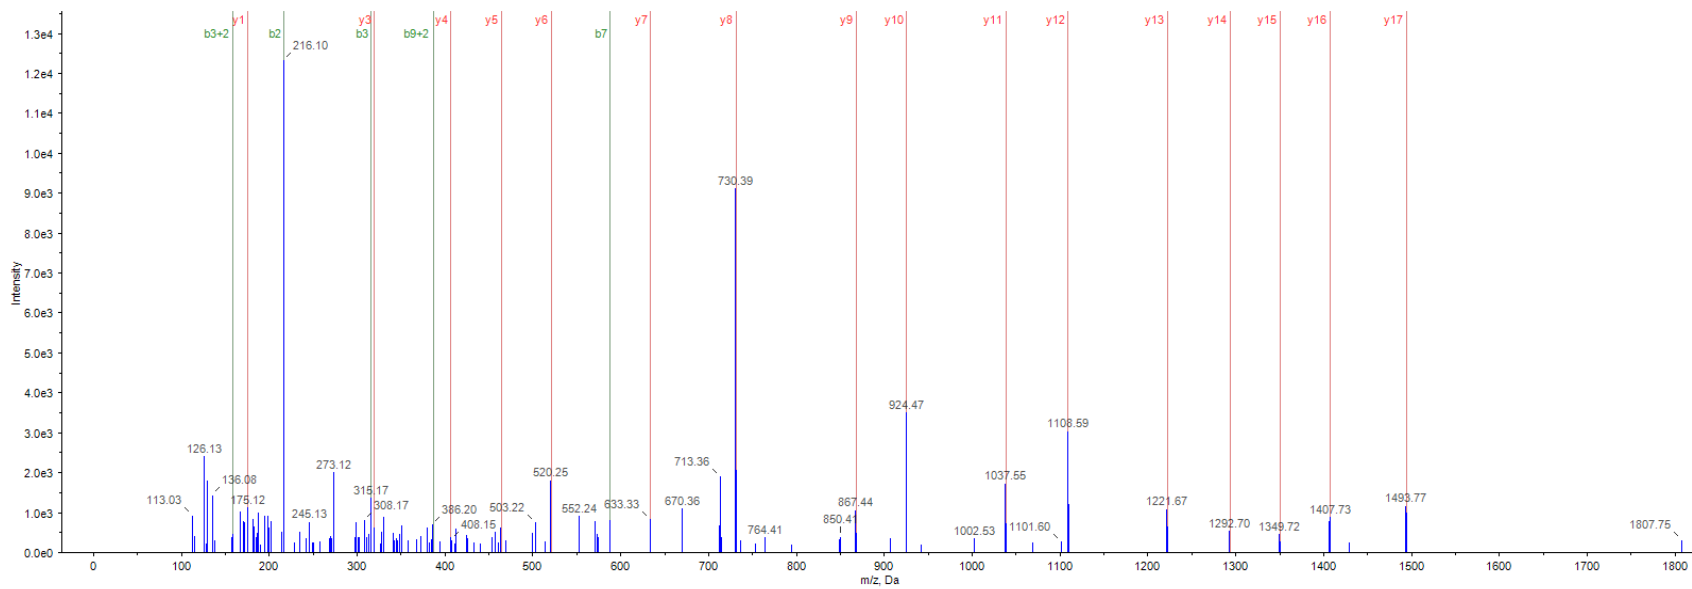

DSH[H]TGVAVR

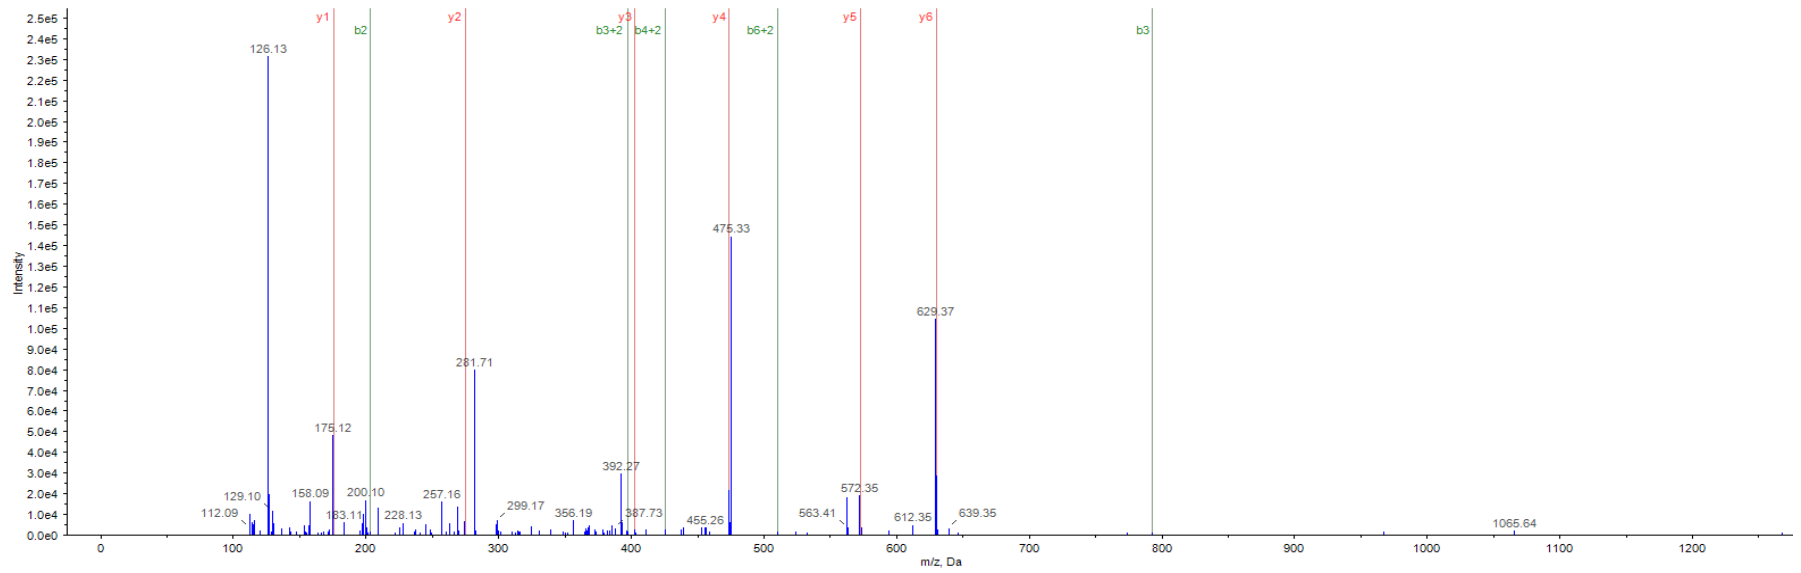

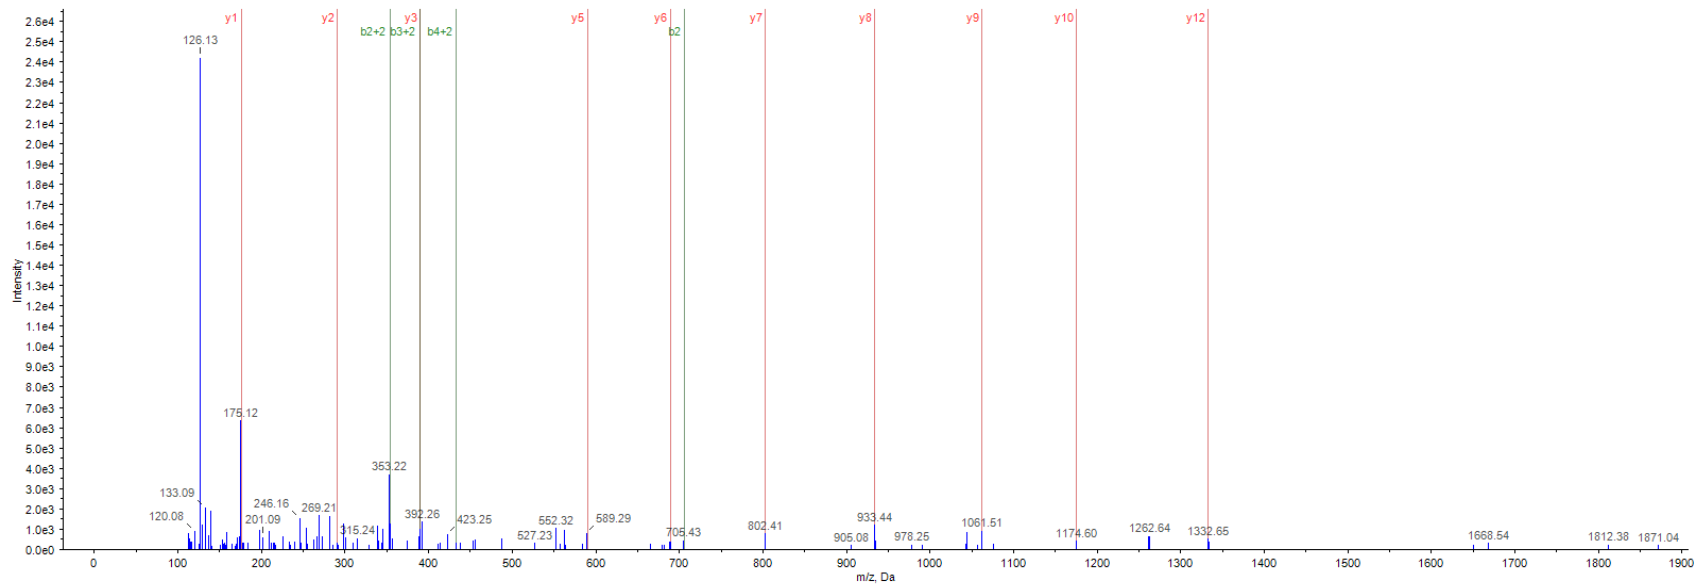



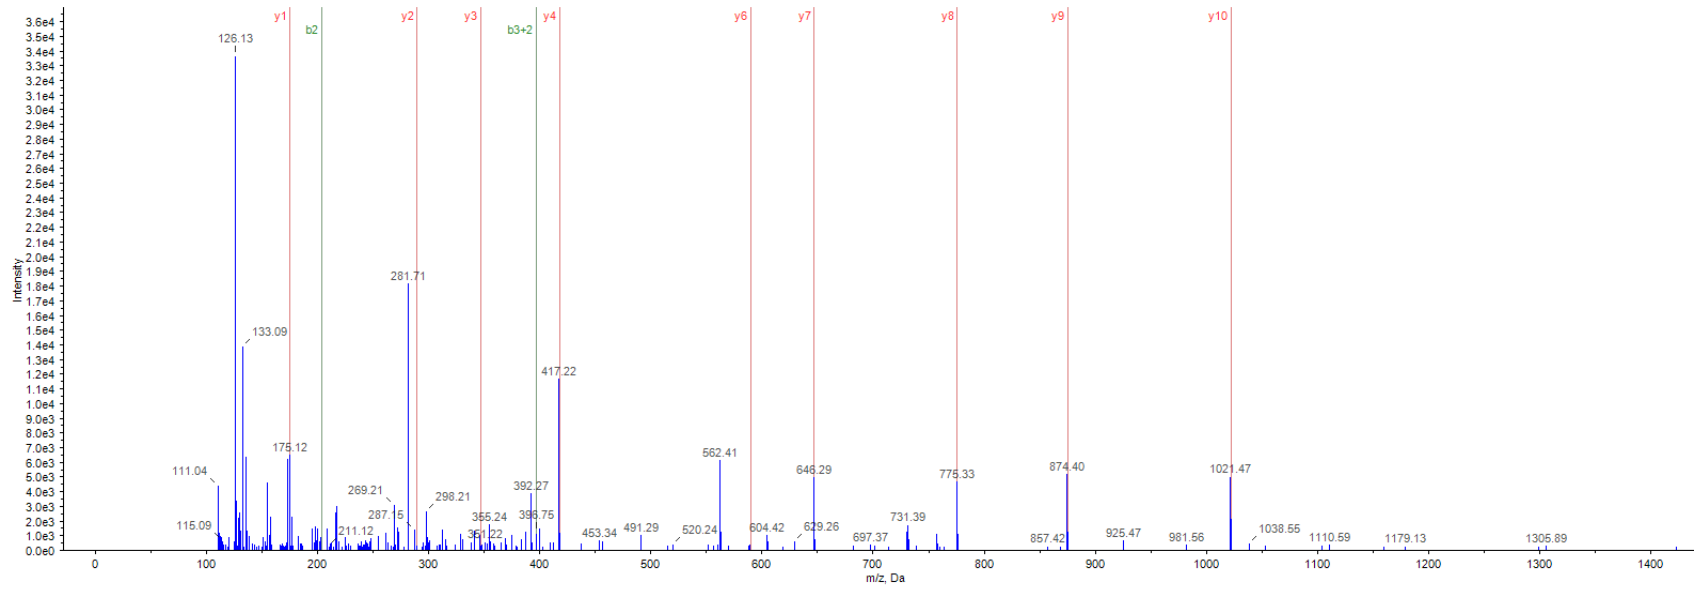

VTHIHIAVVTVPAYFNDAQR

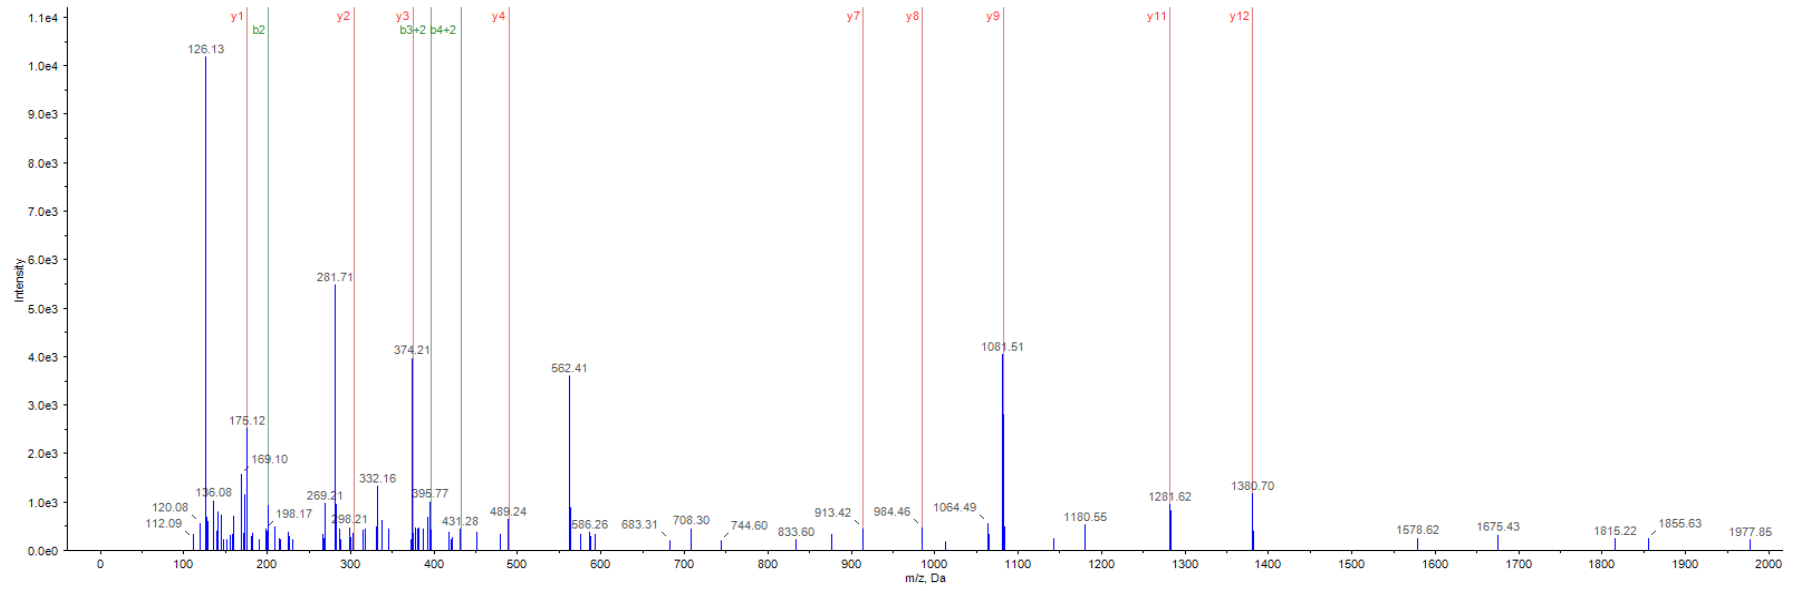

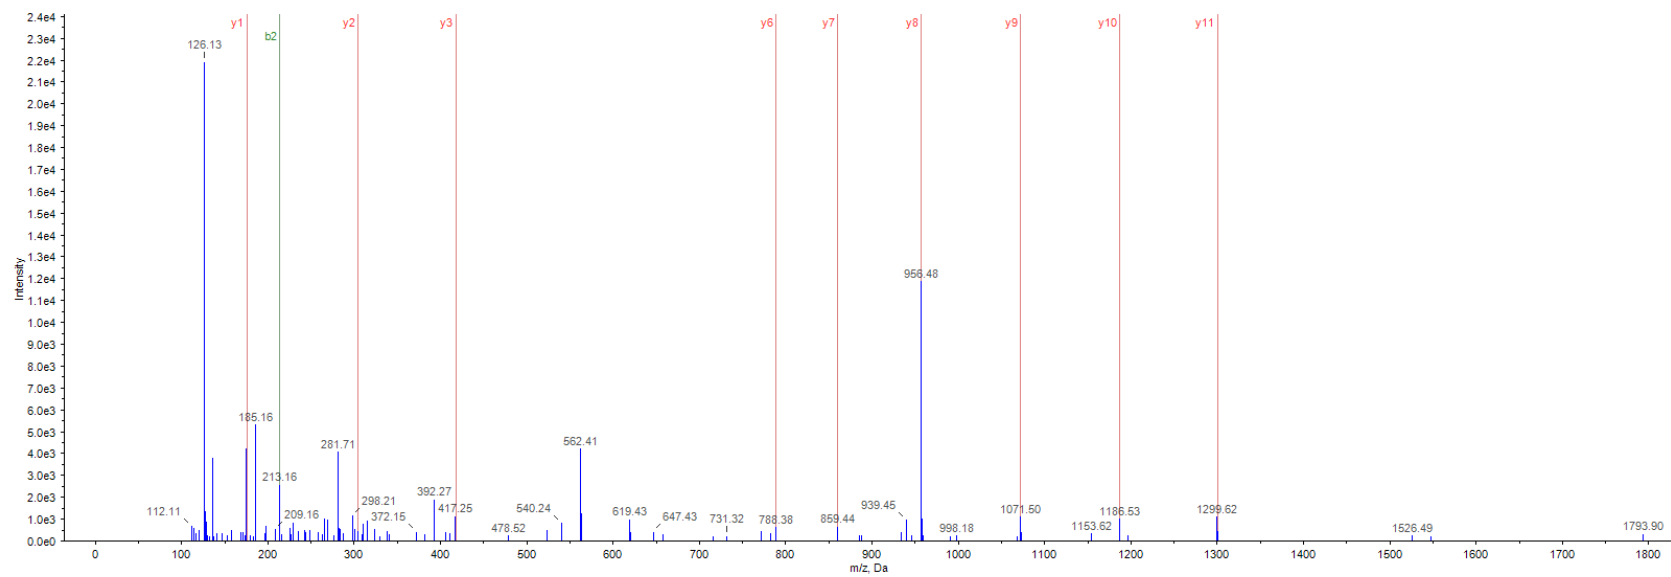

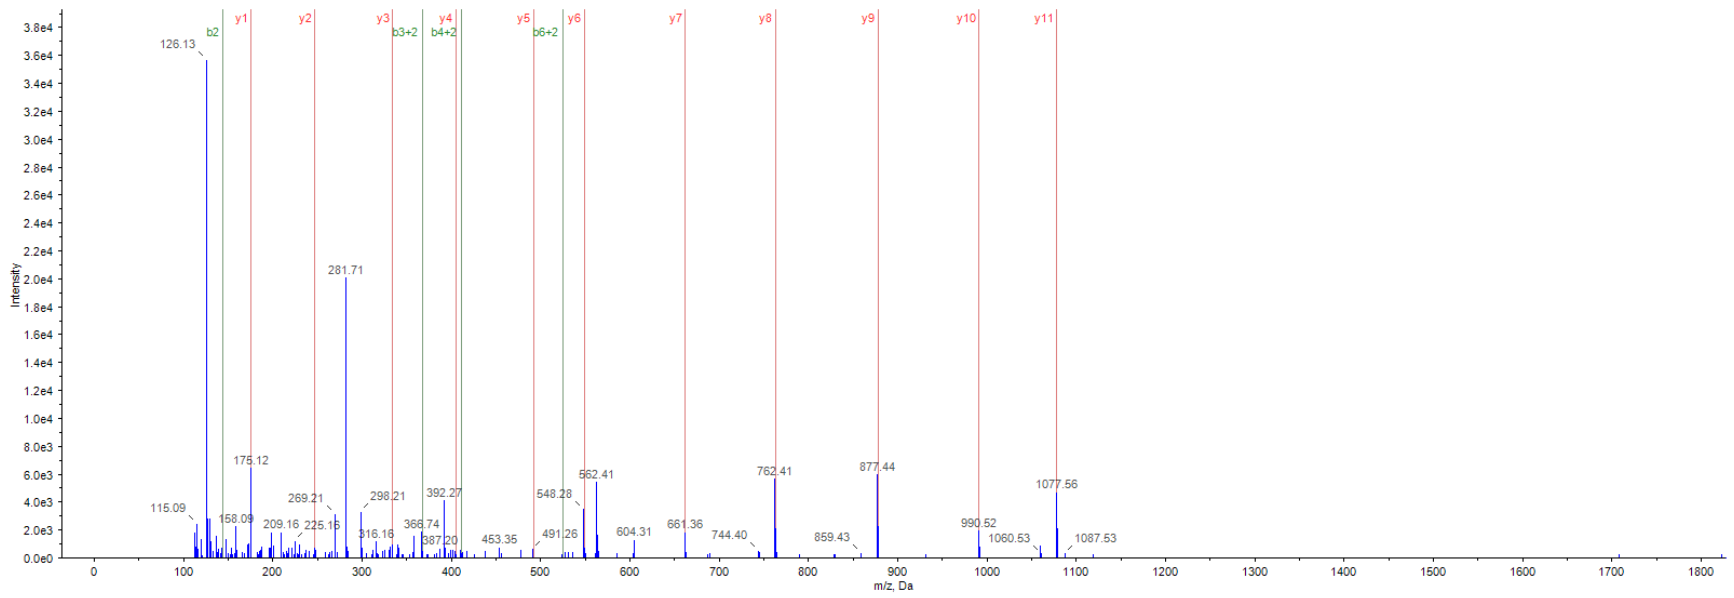

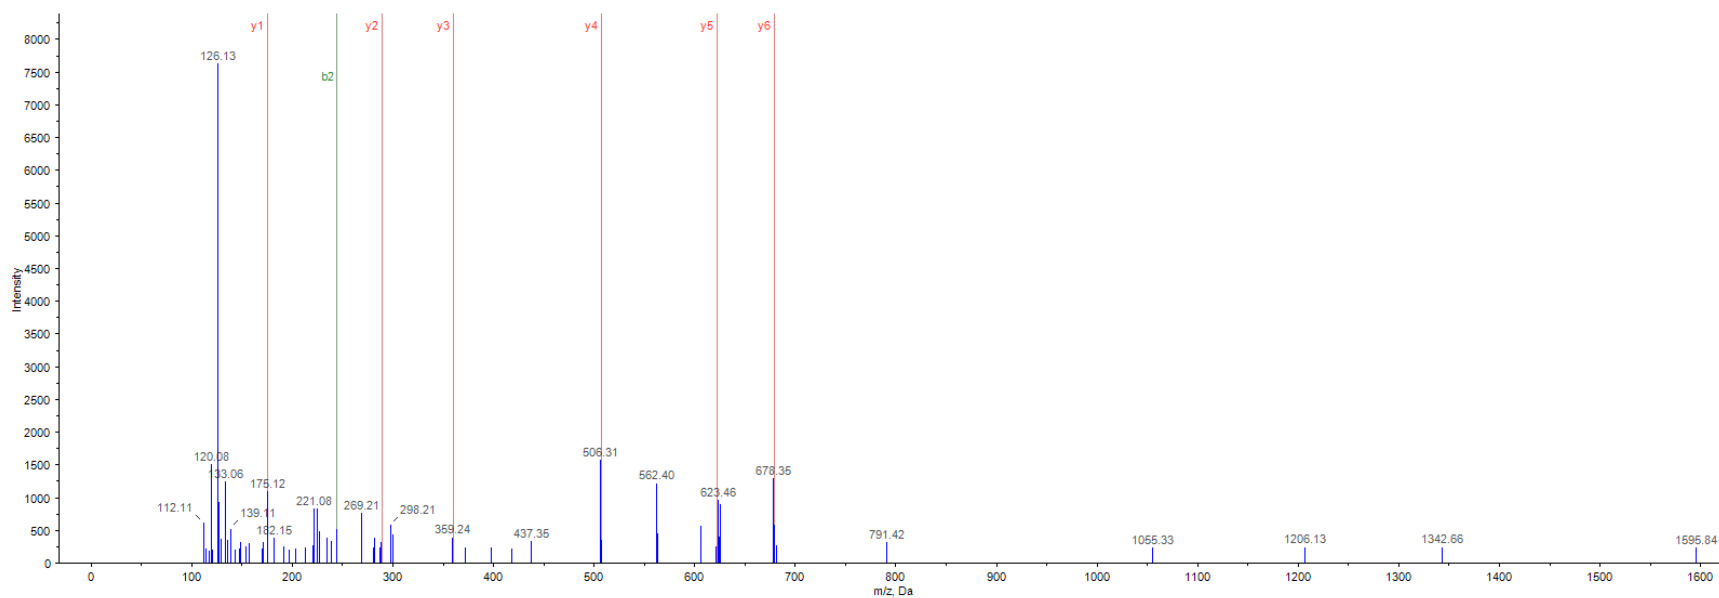

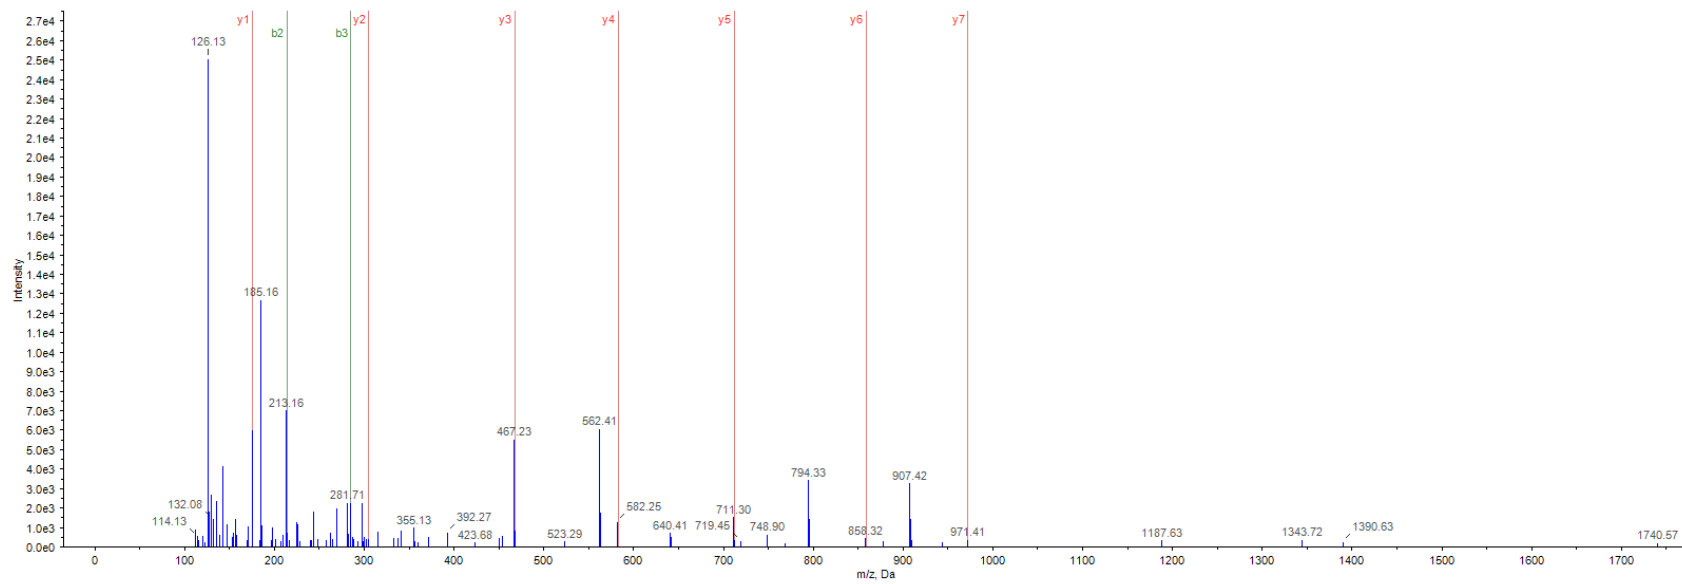

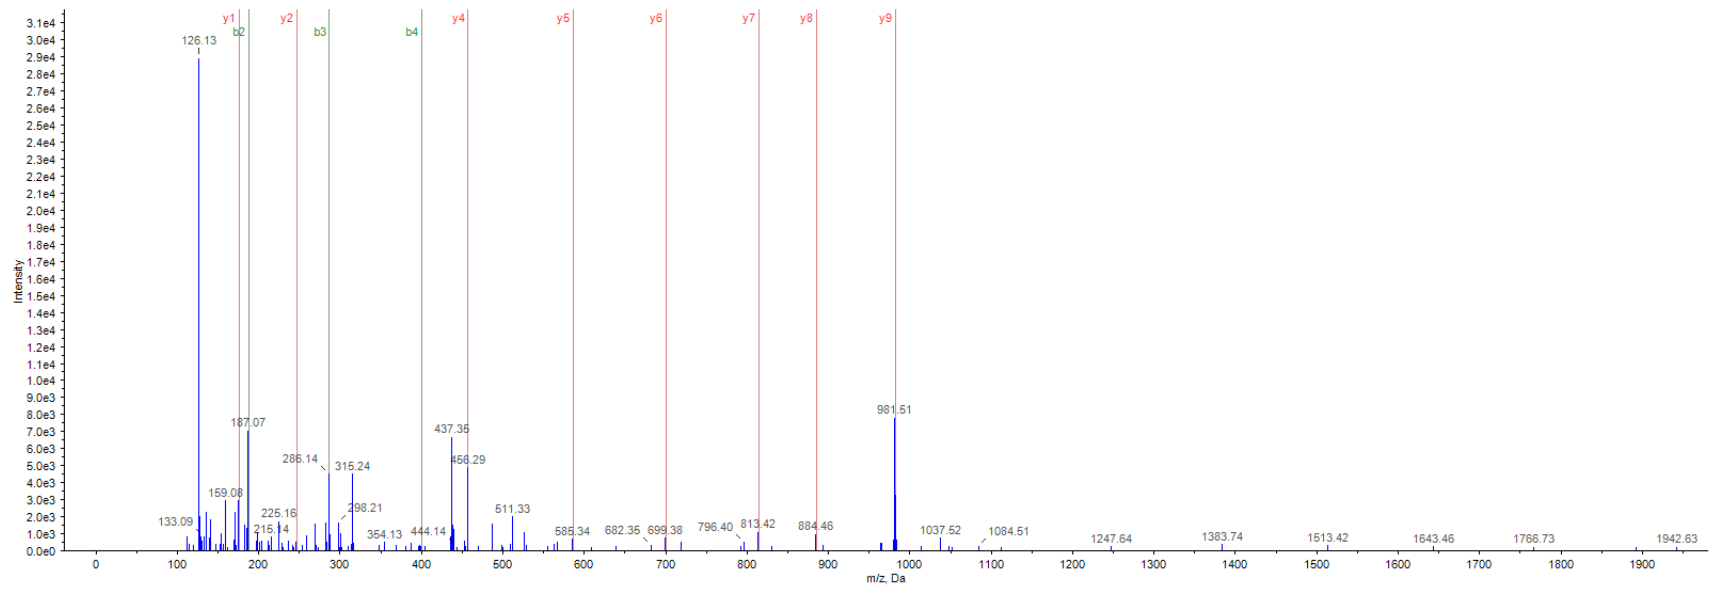

RDPSVGEHHTTVEVLR

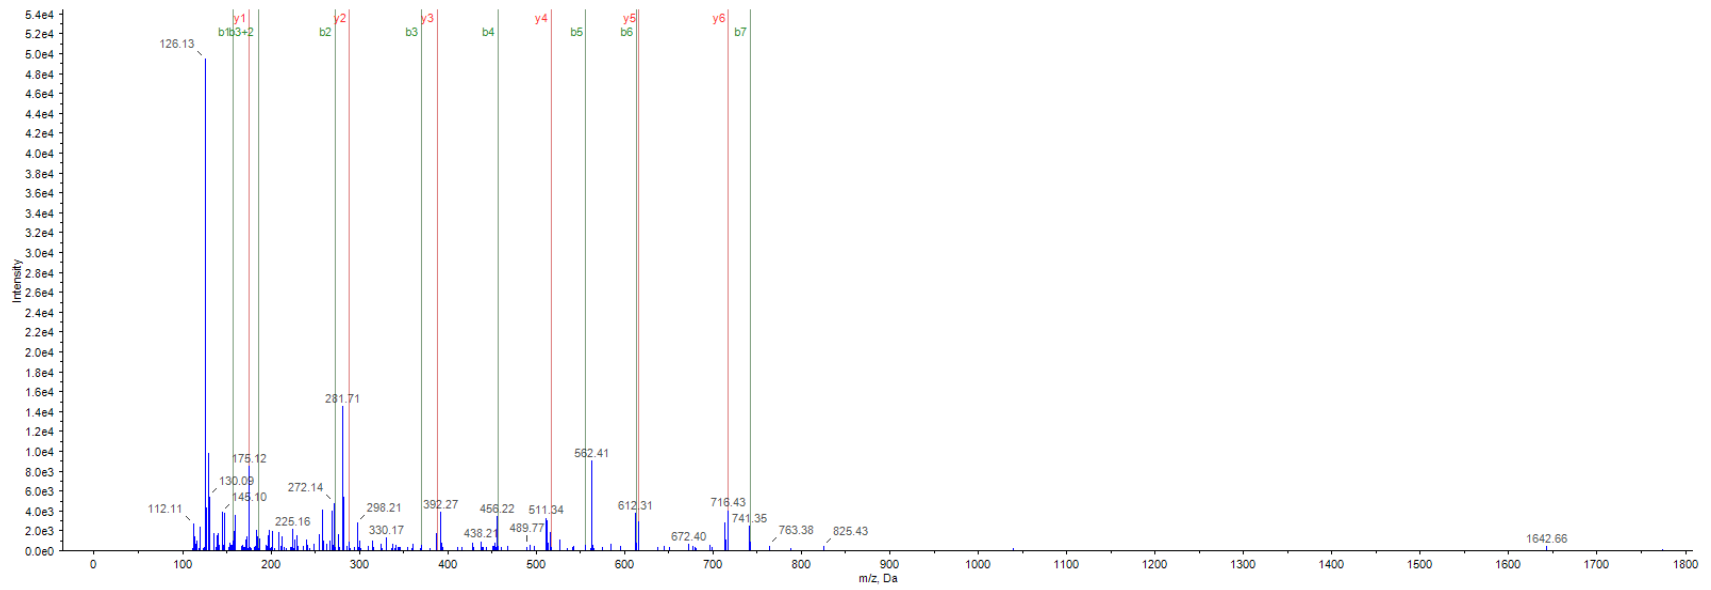



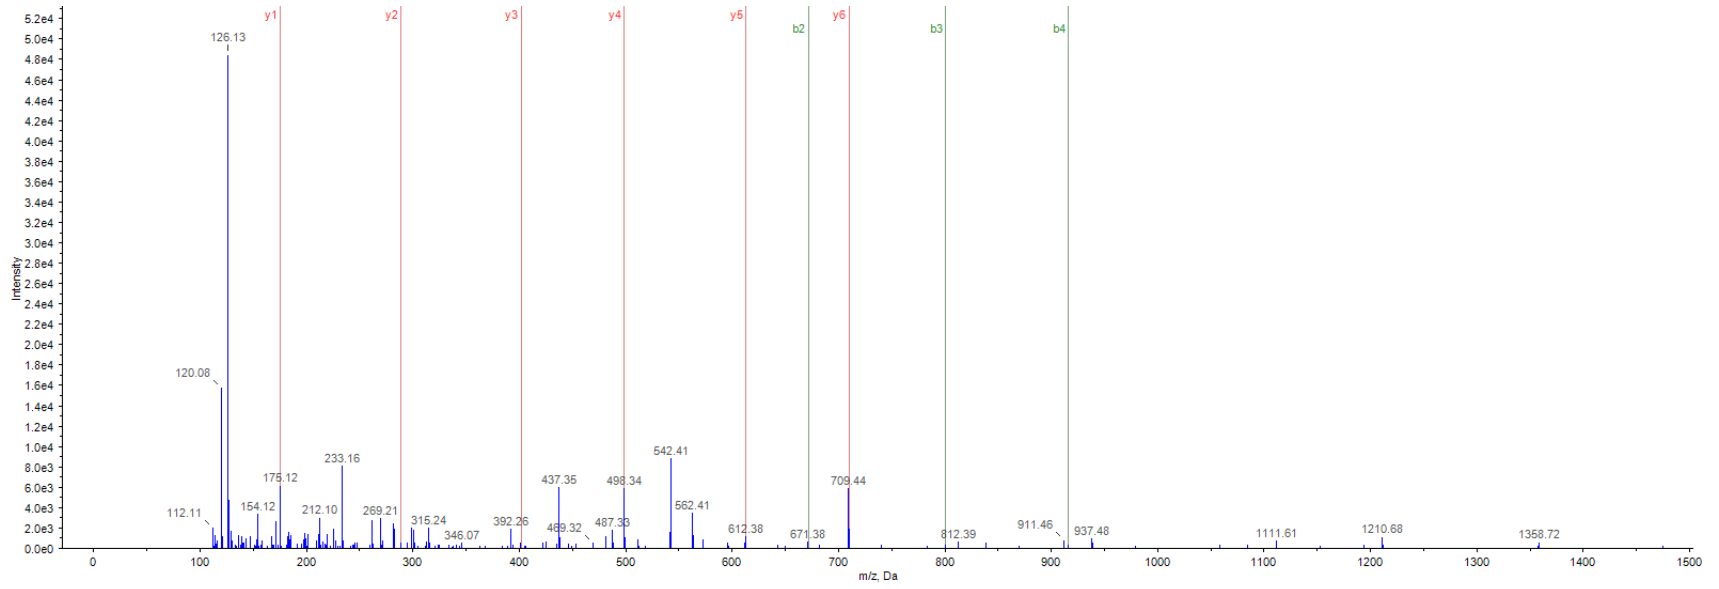

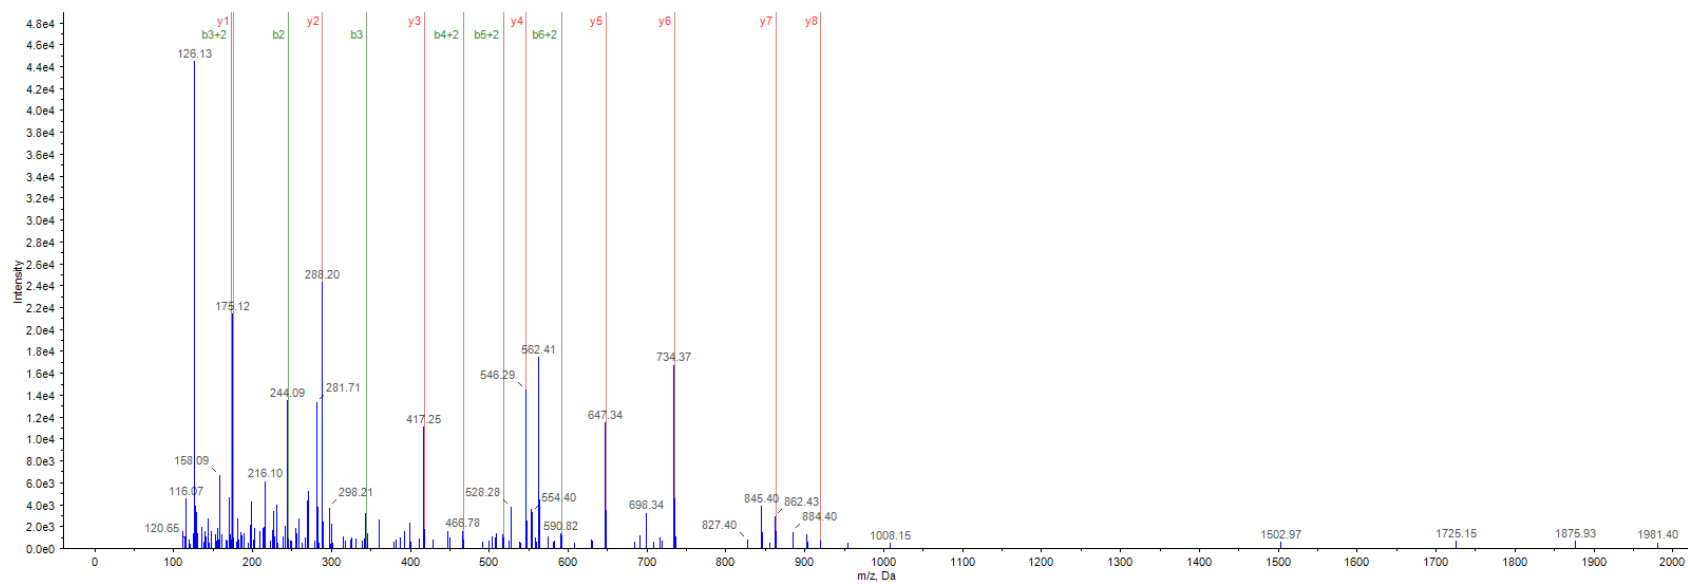

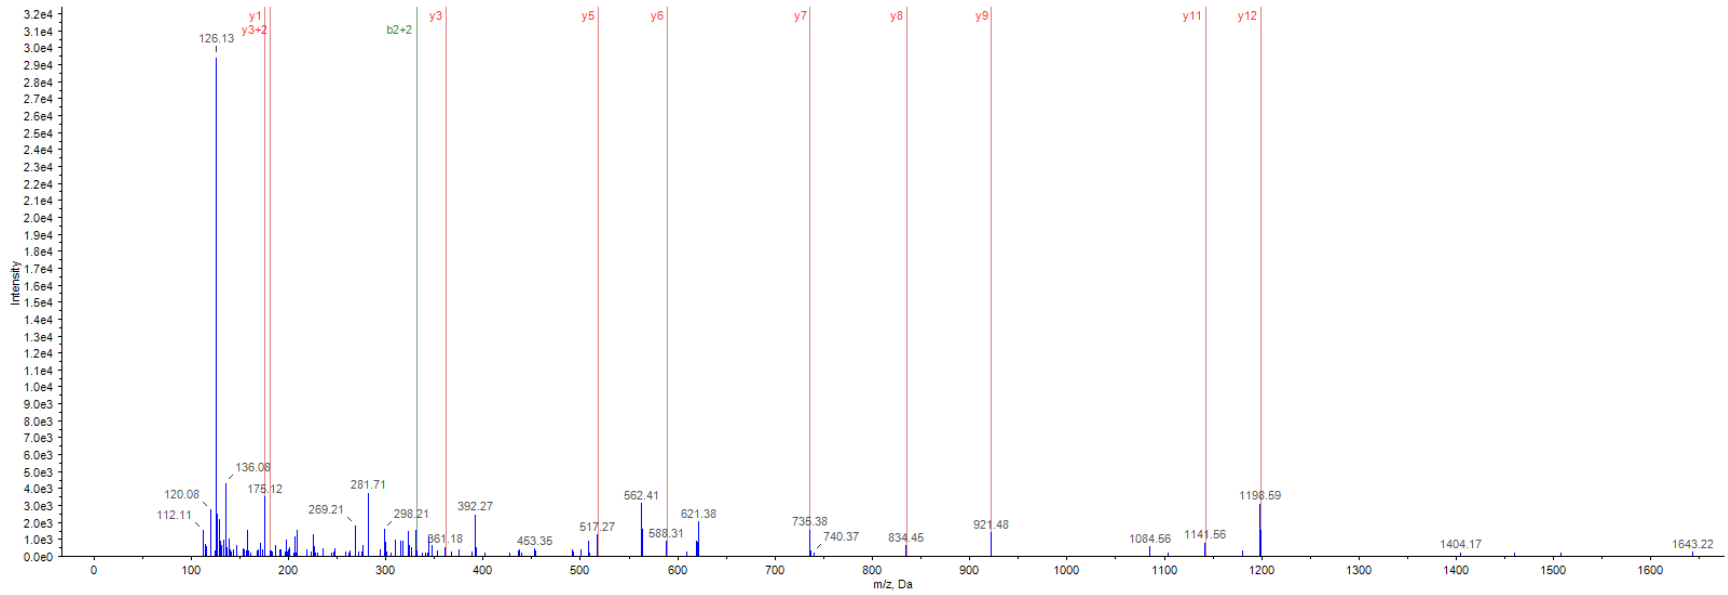

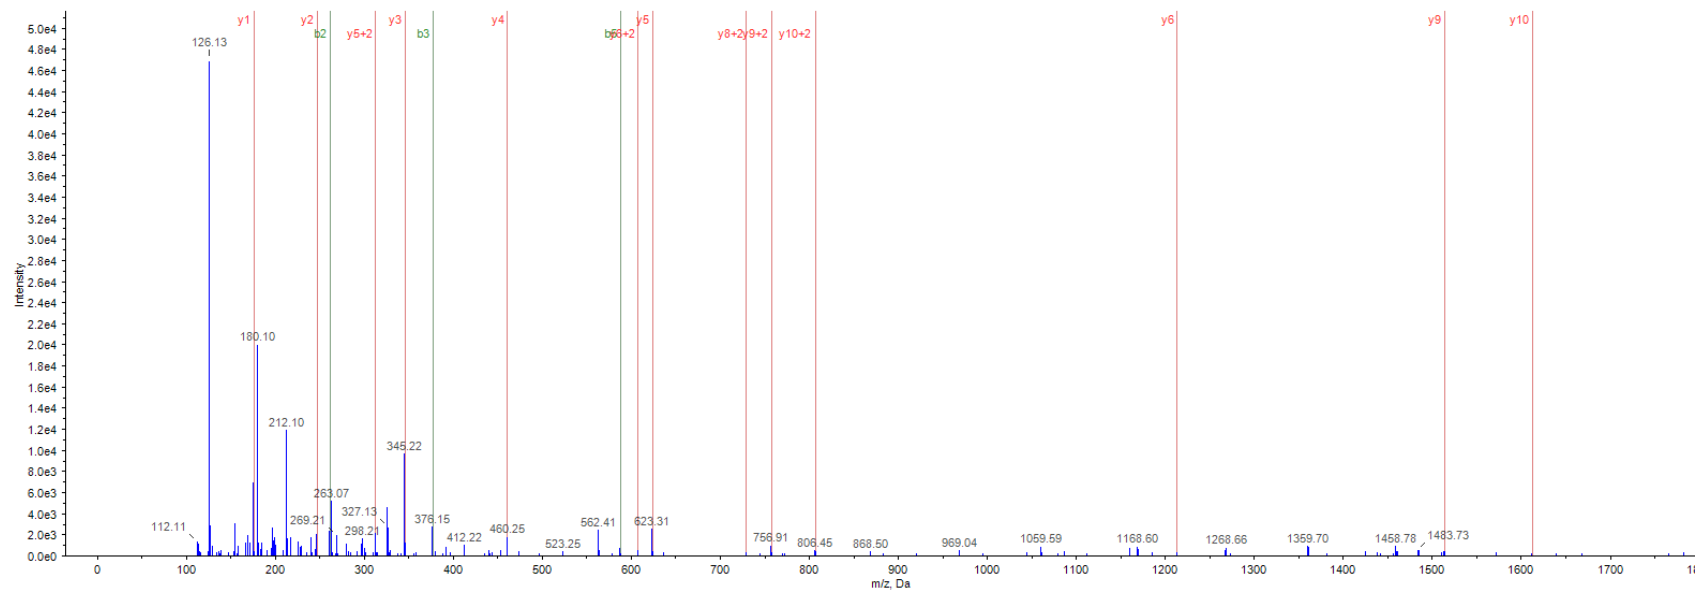

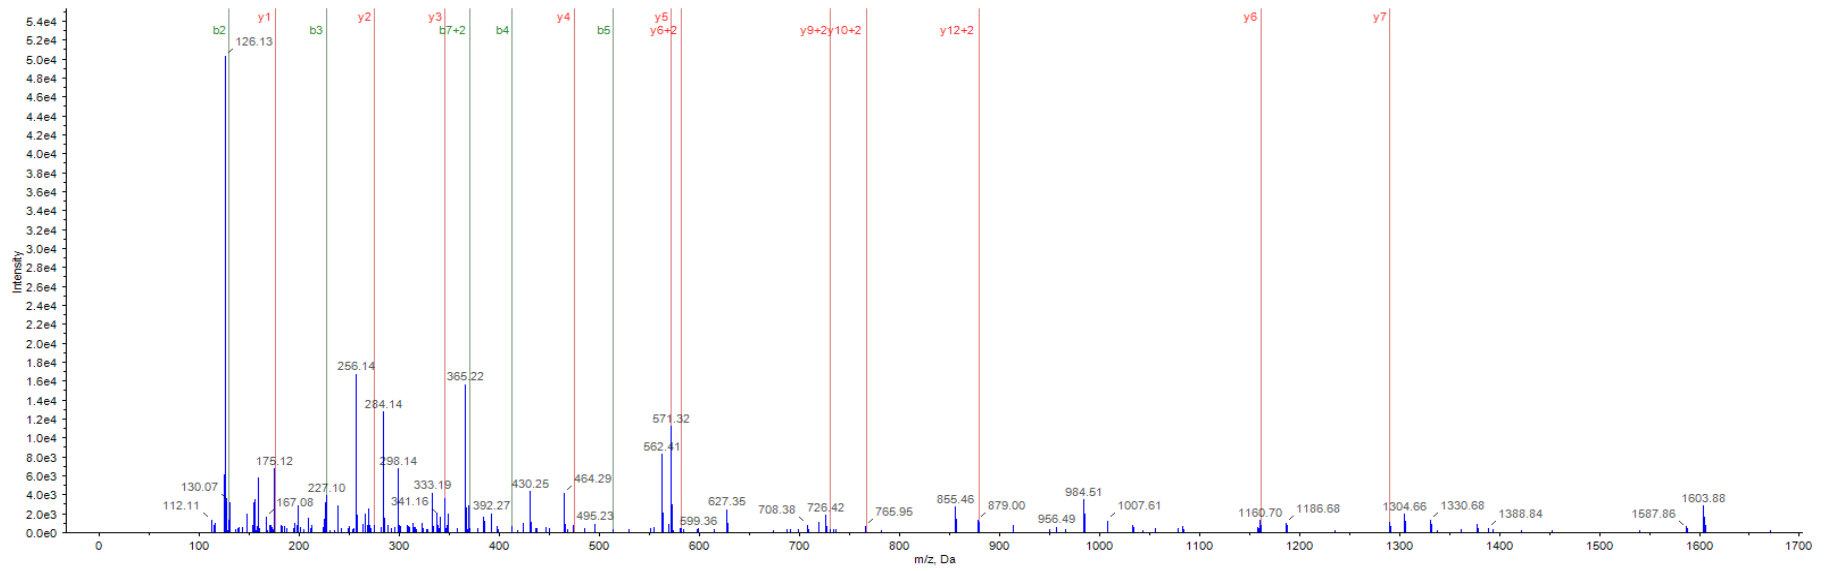

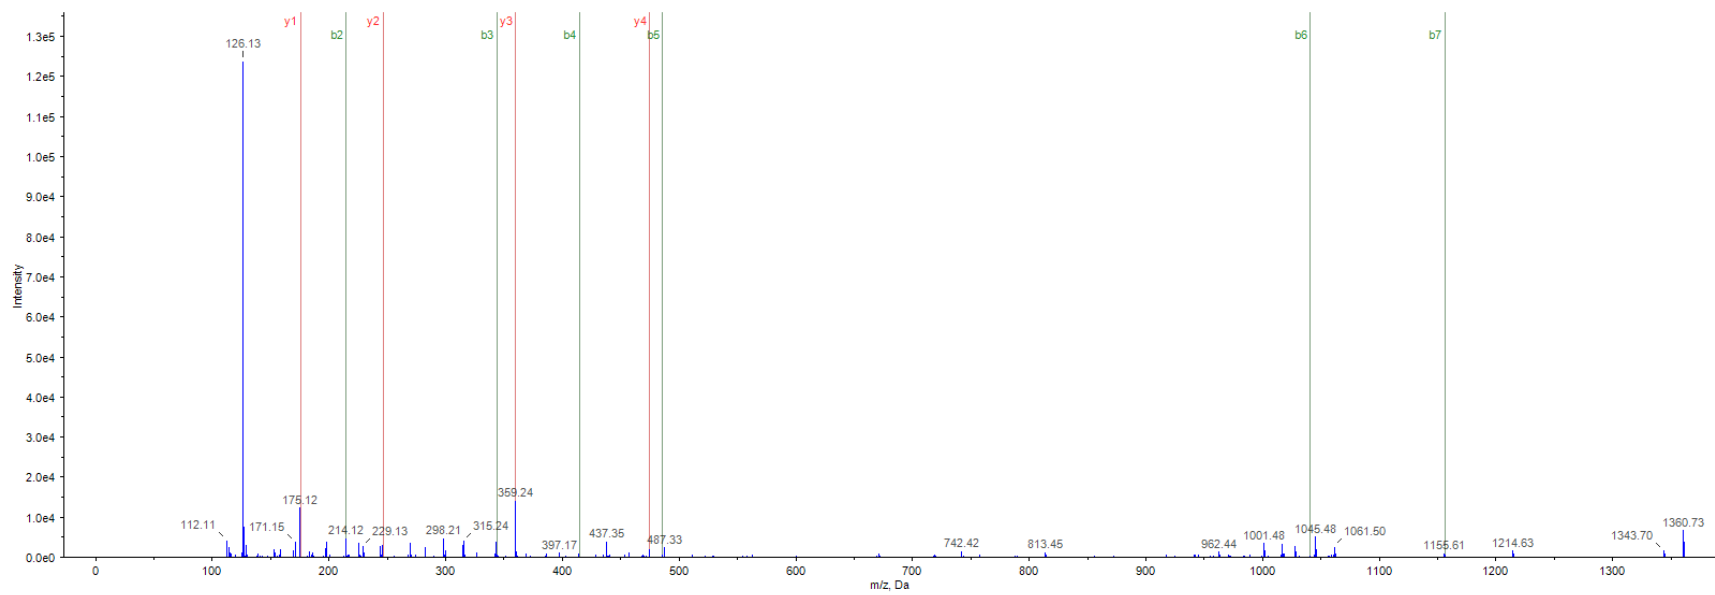

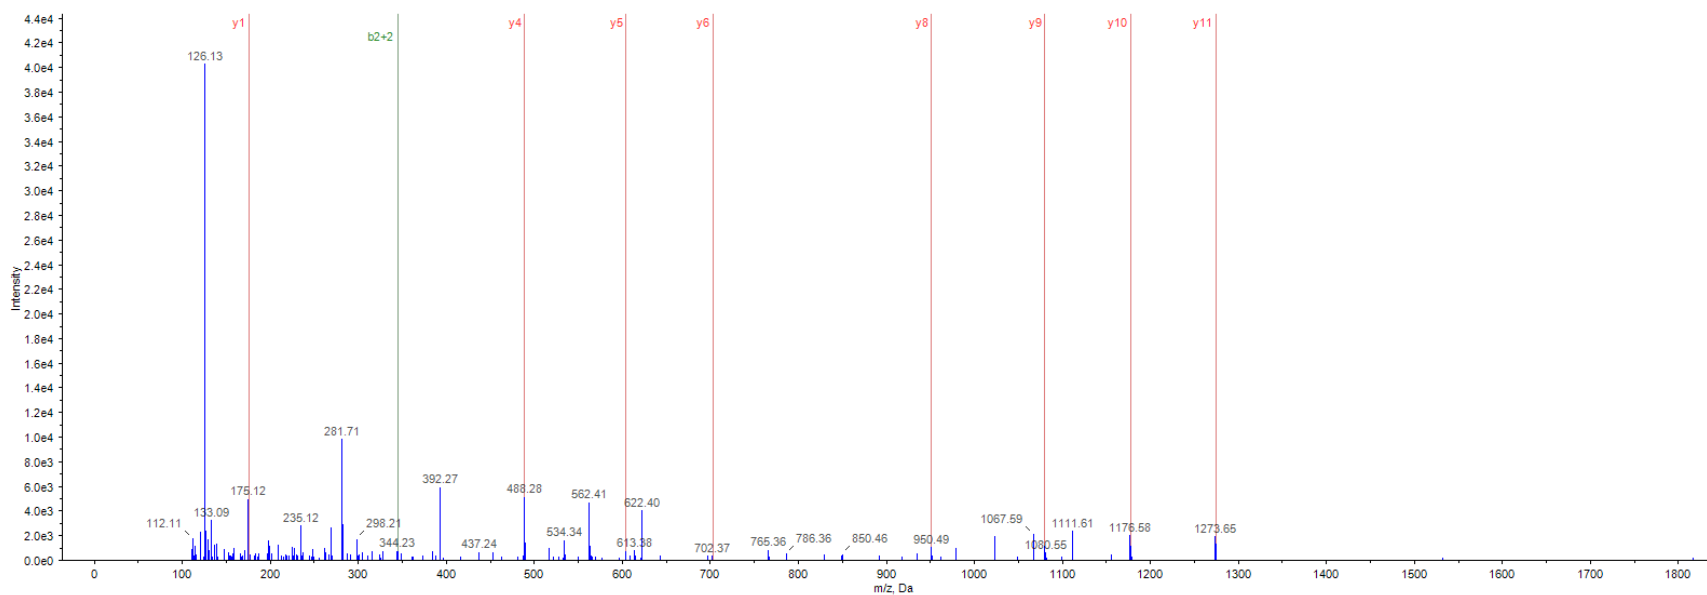

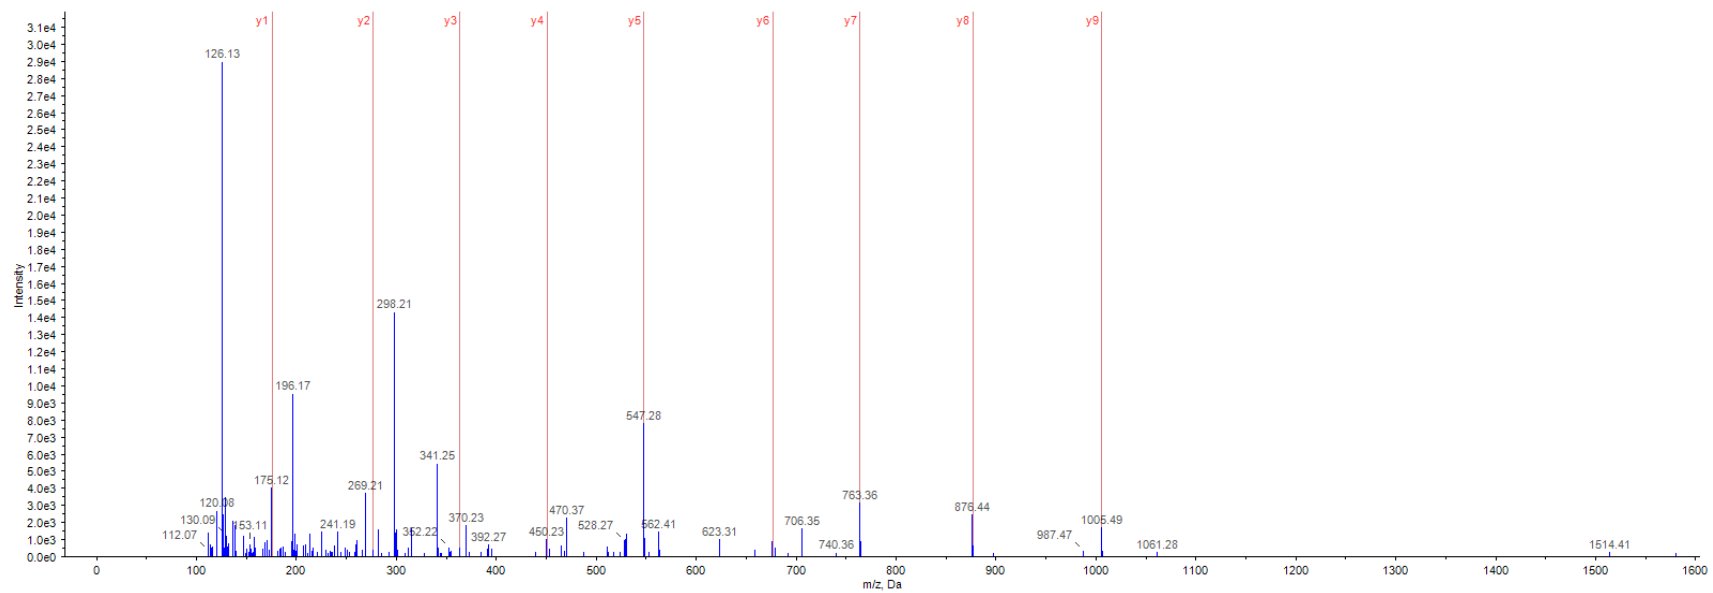



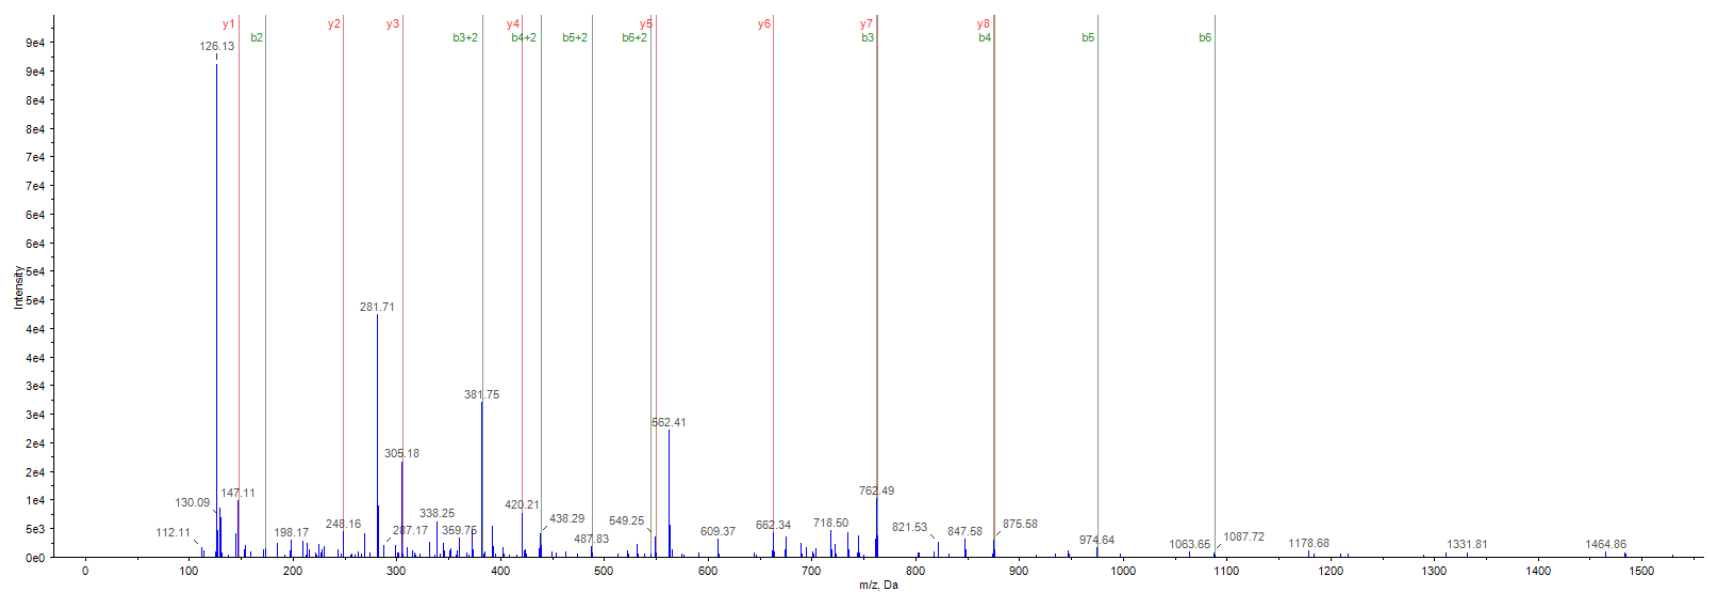

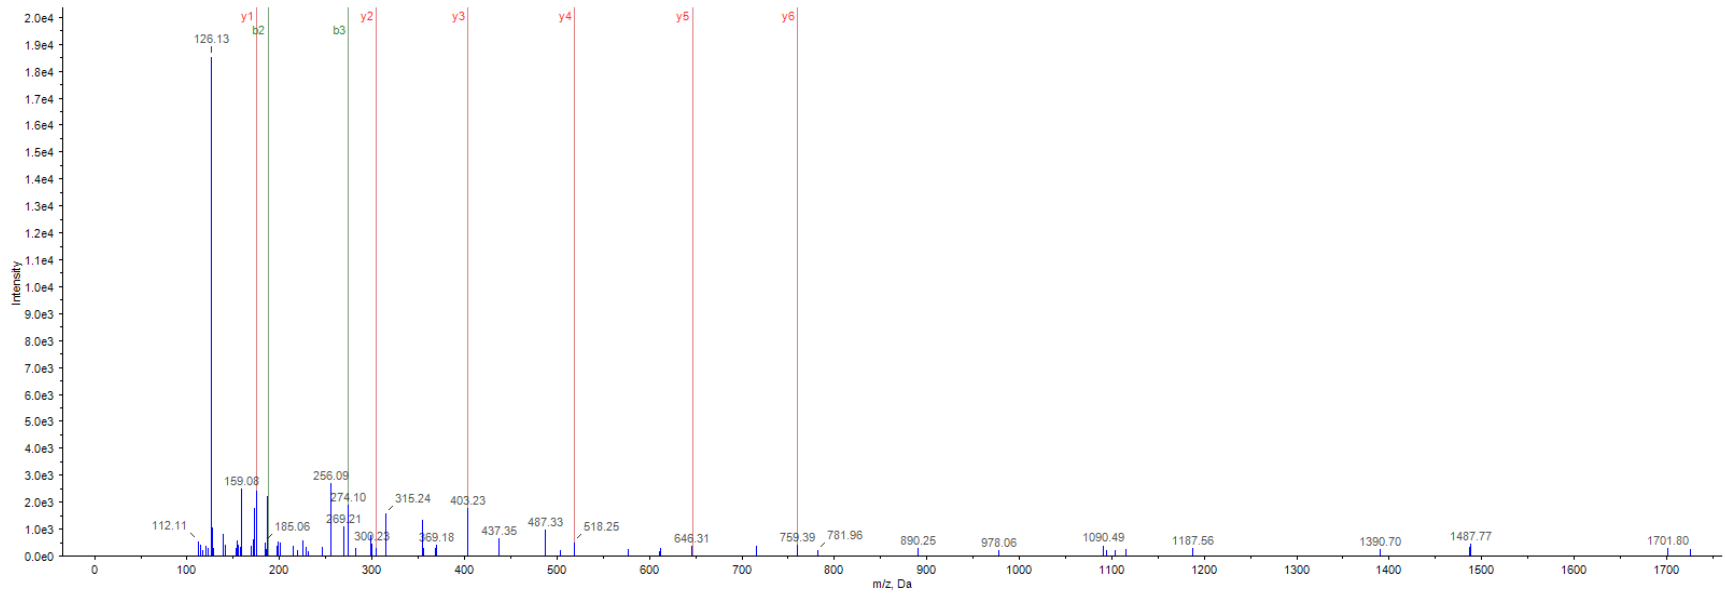

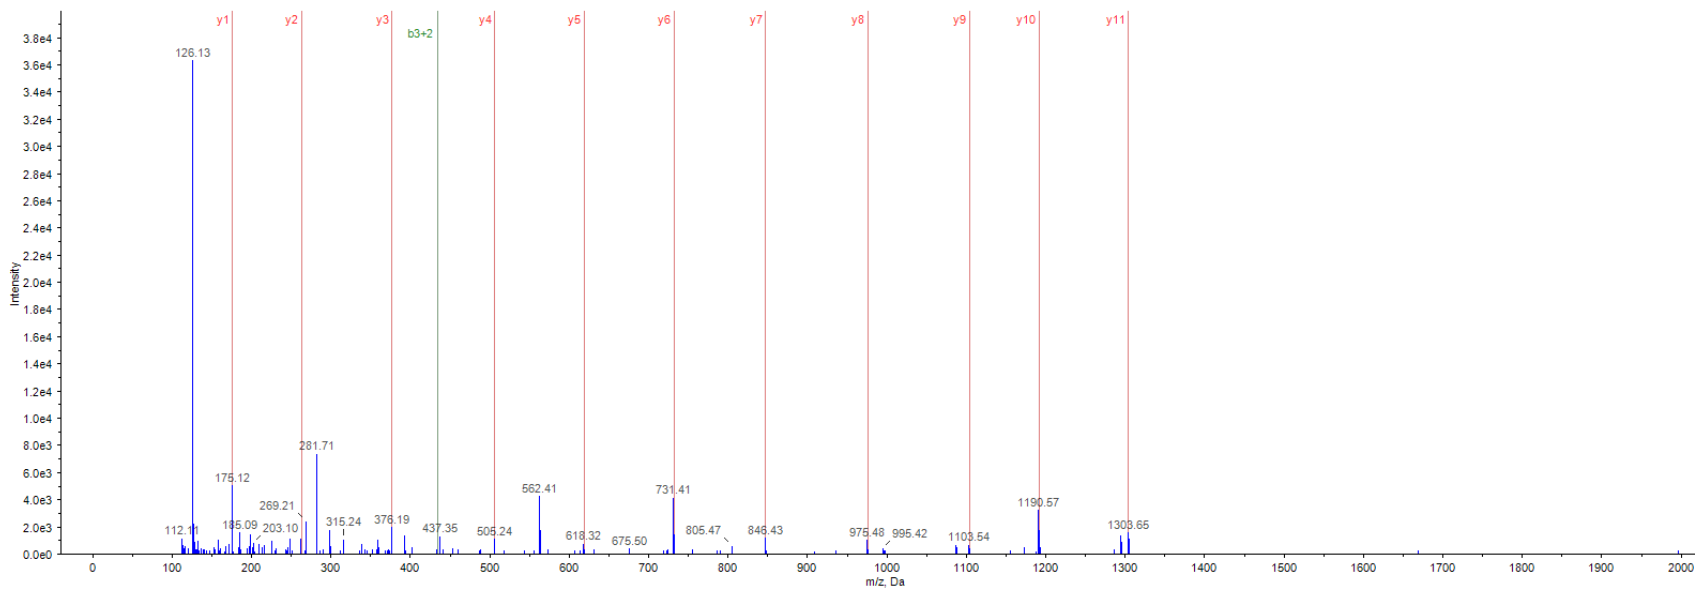

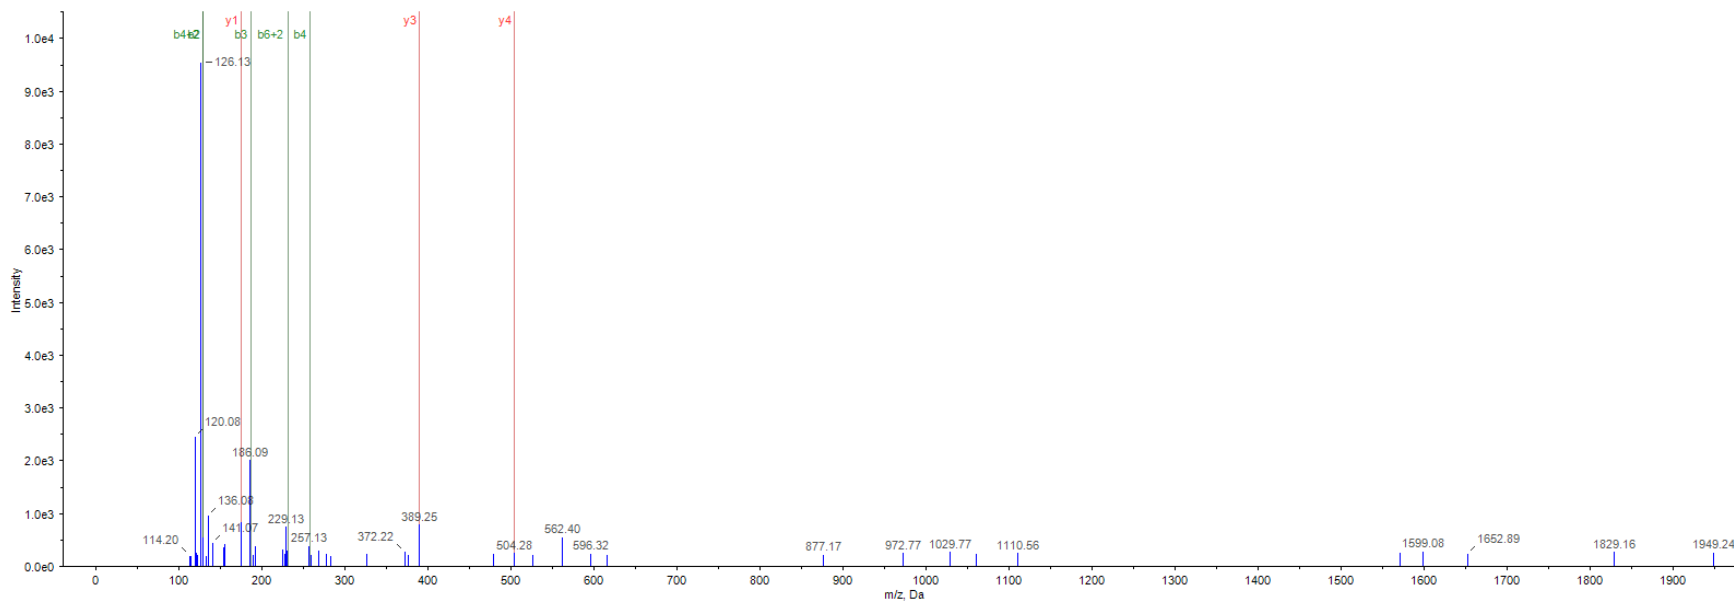

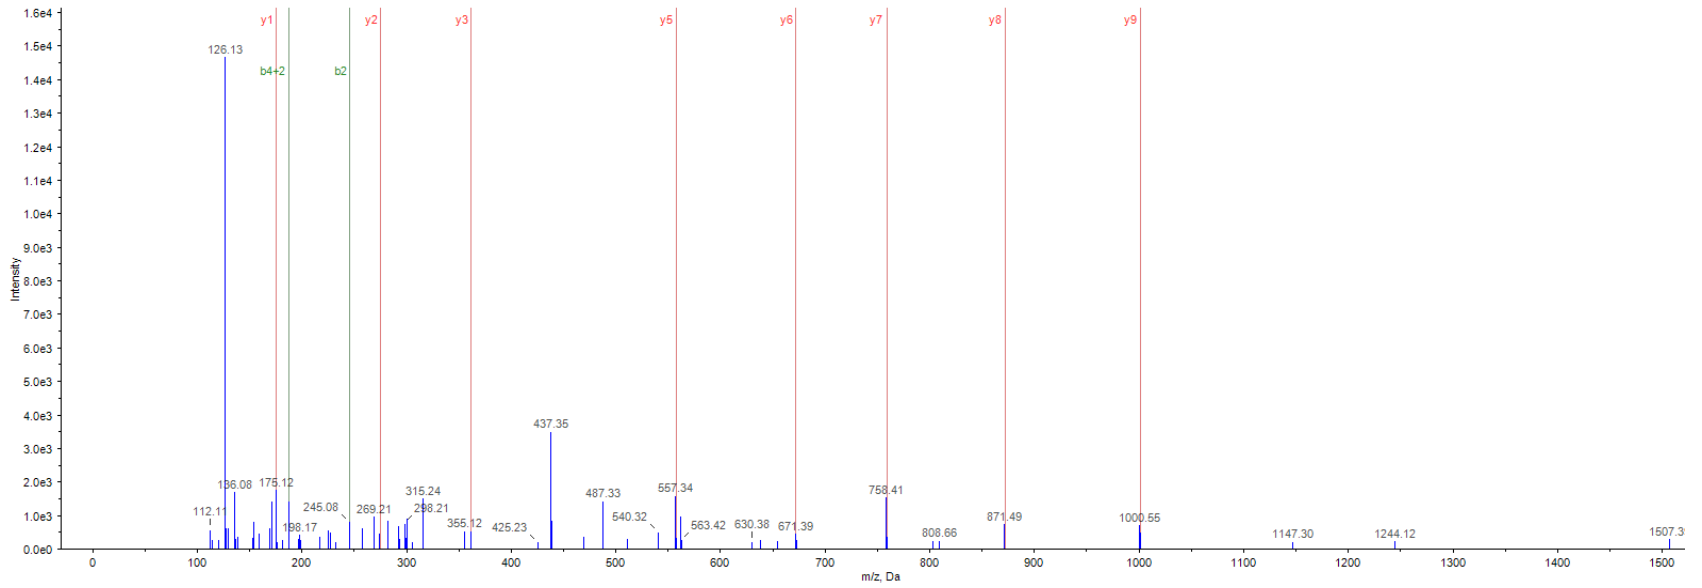

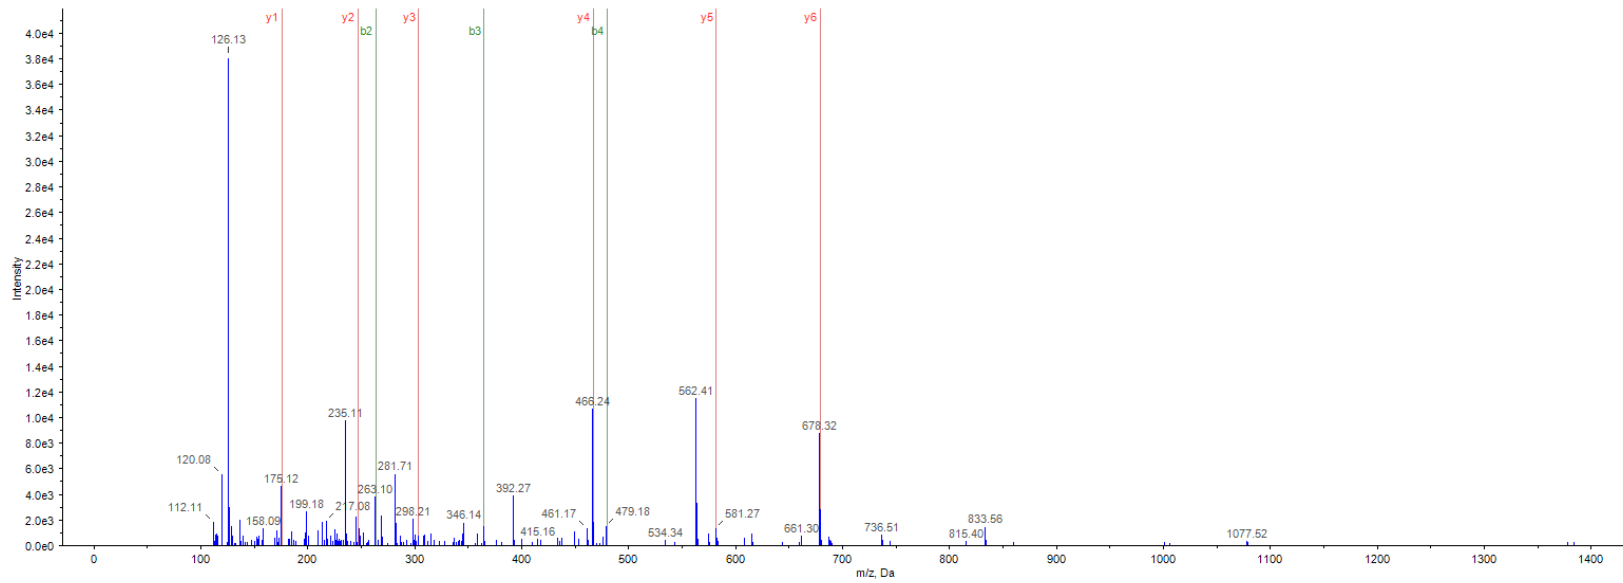

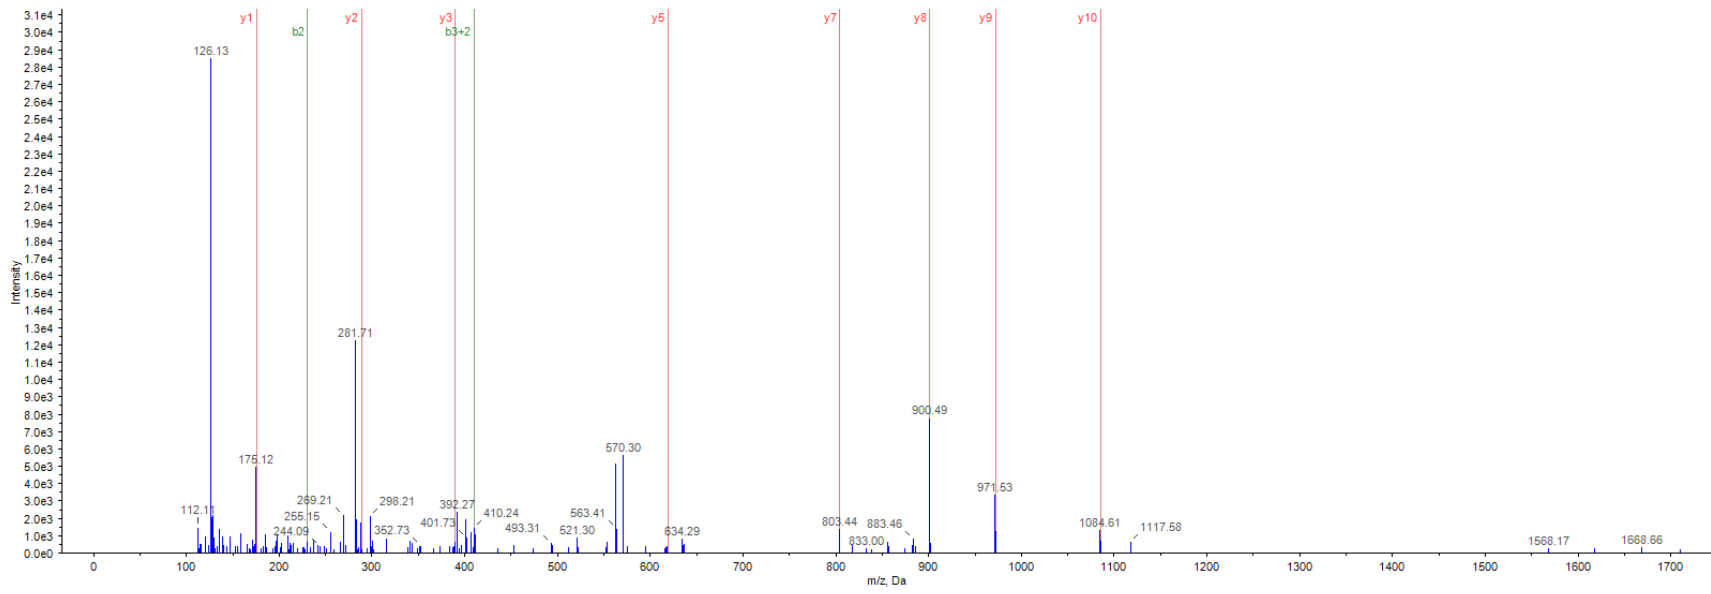

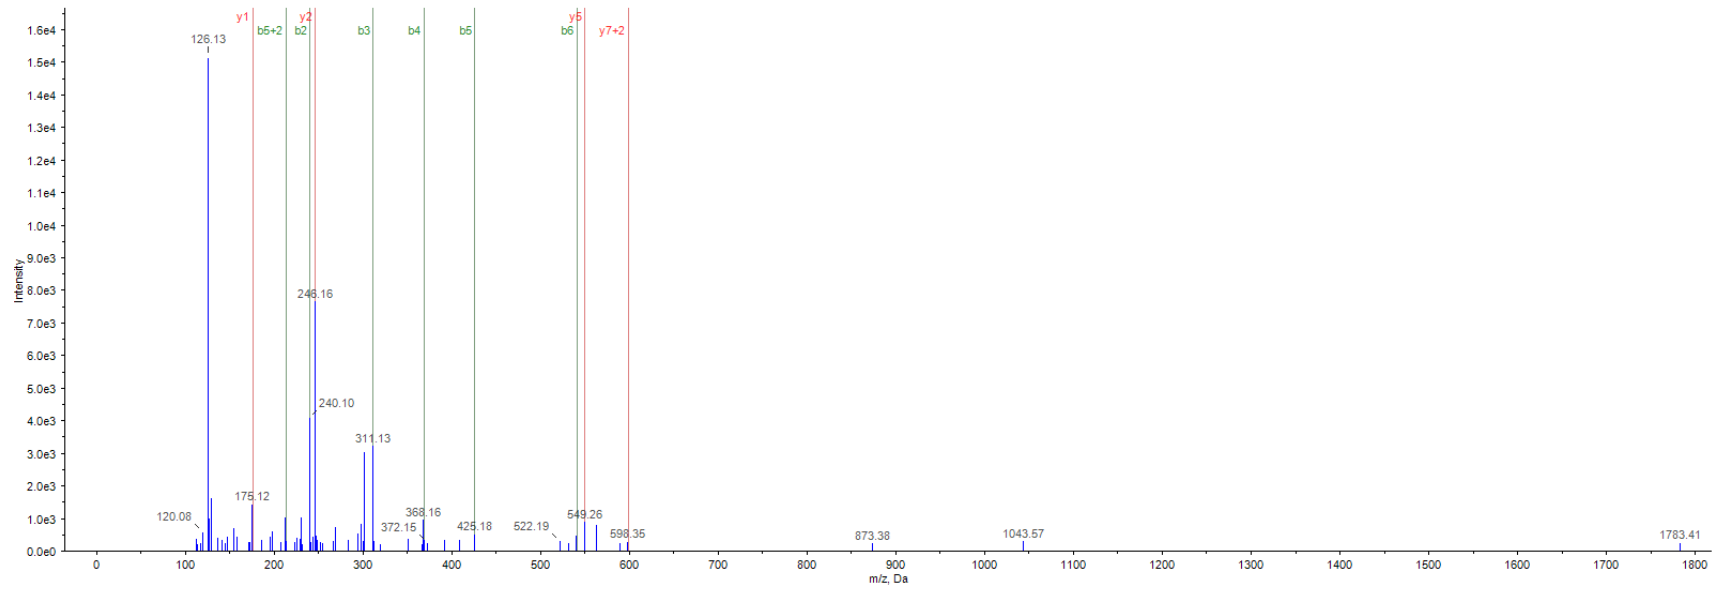



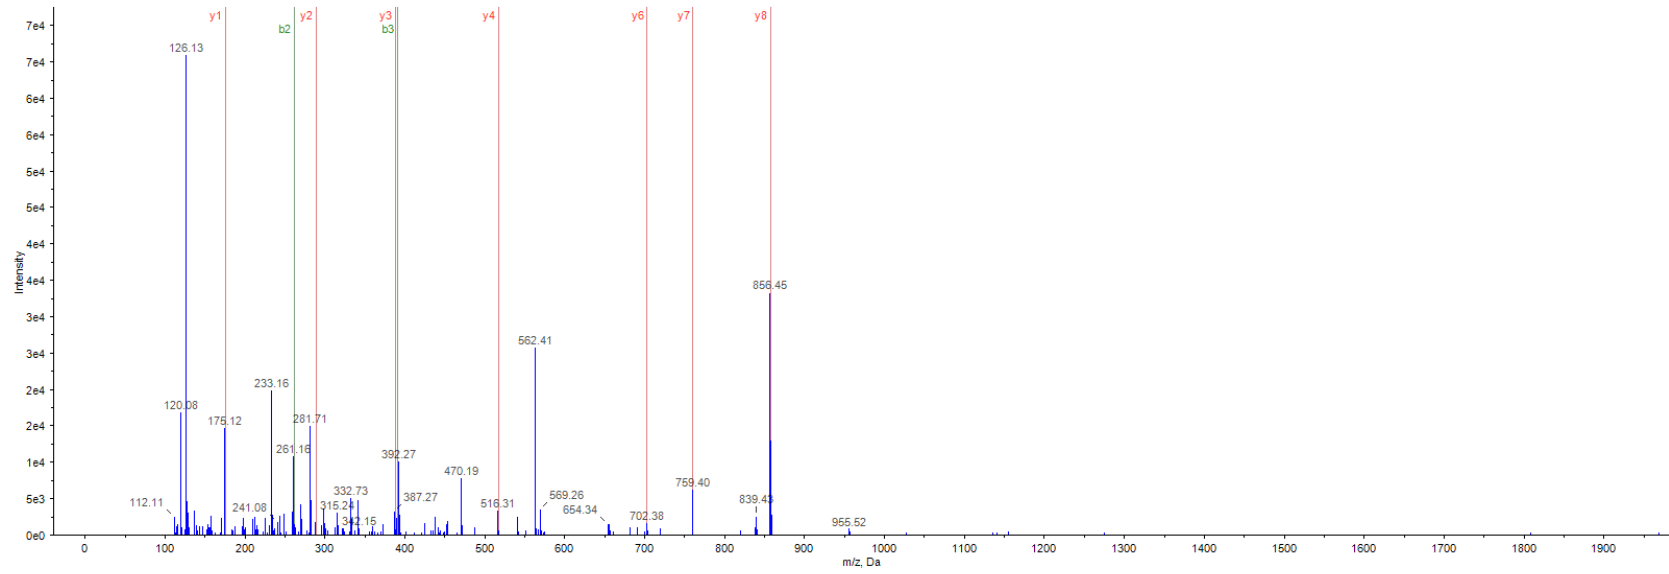

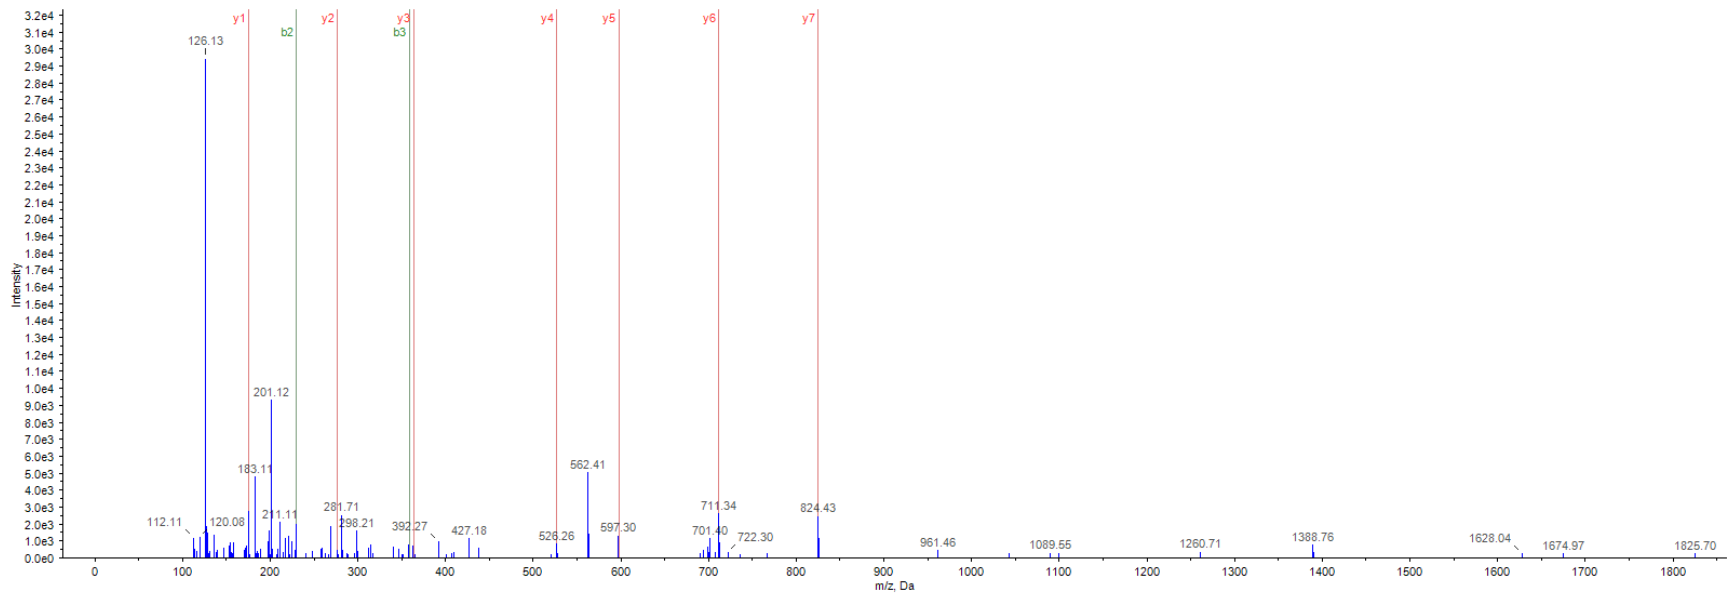

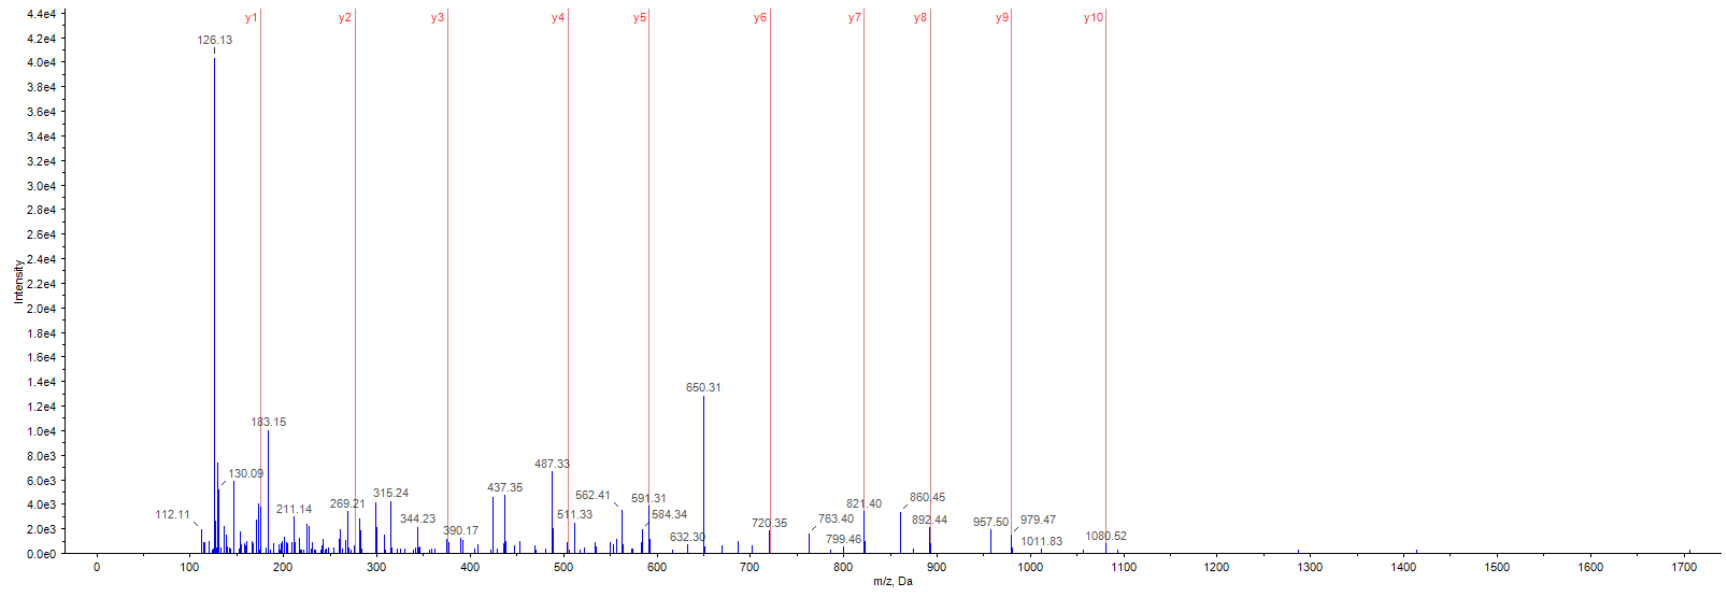

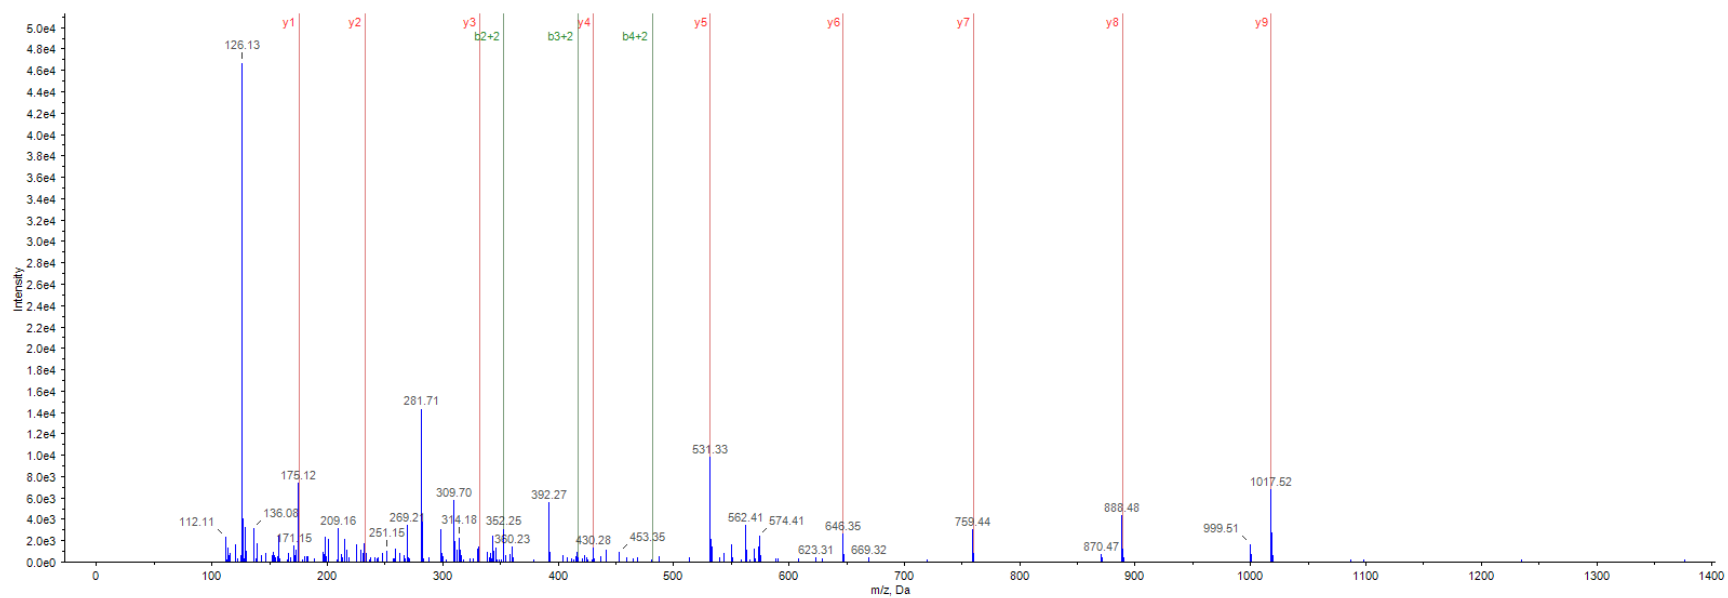

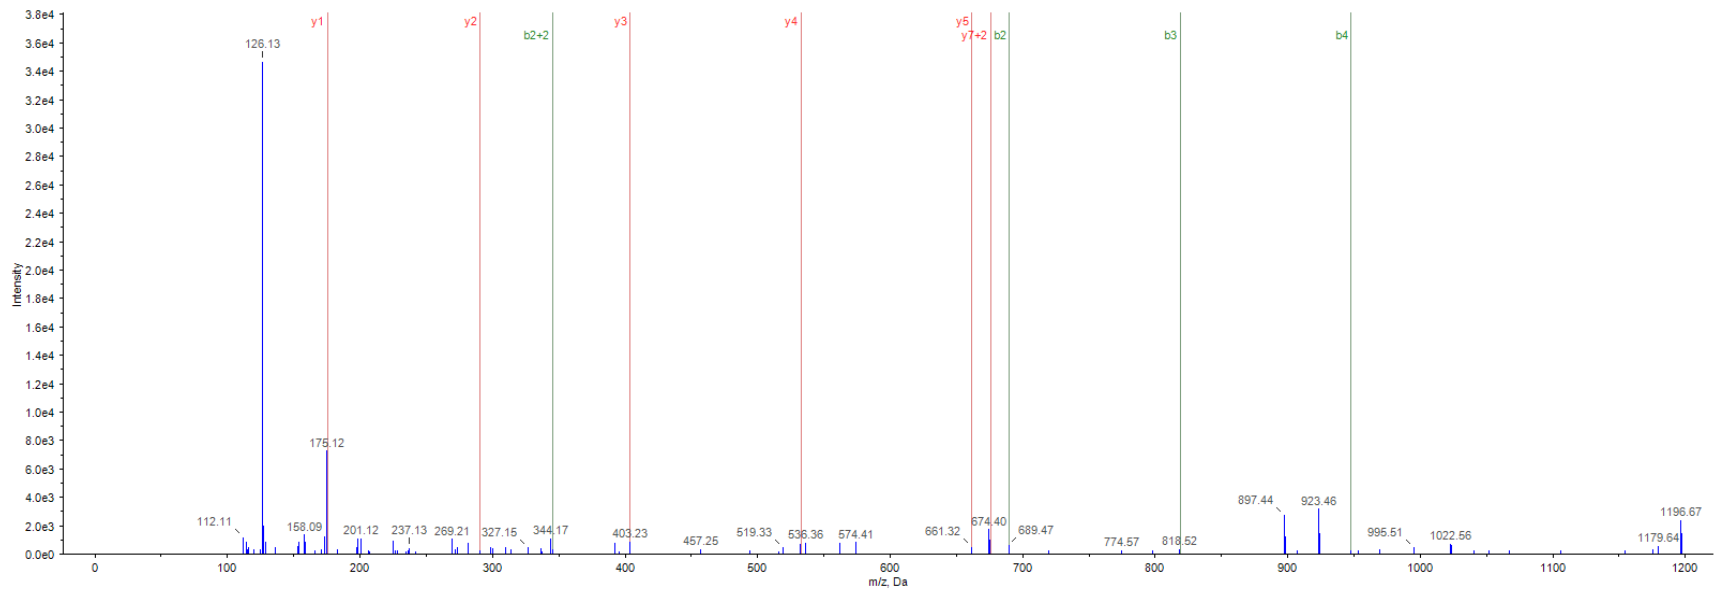

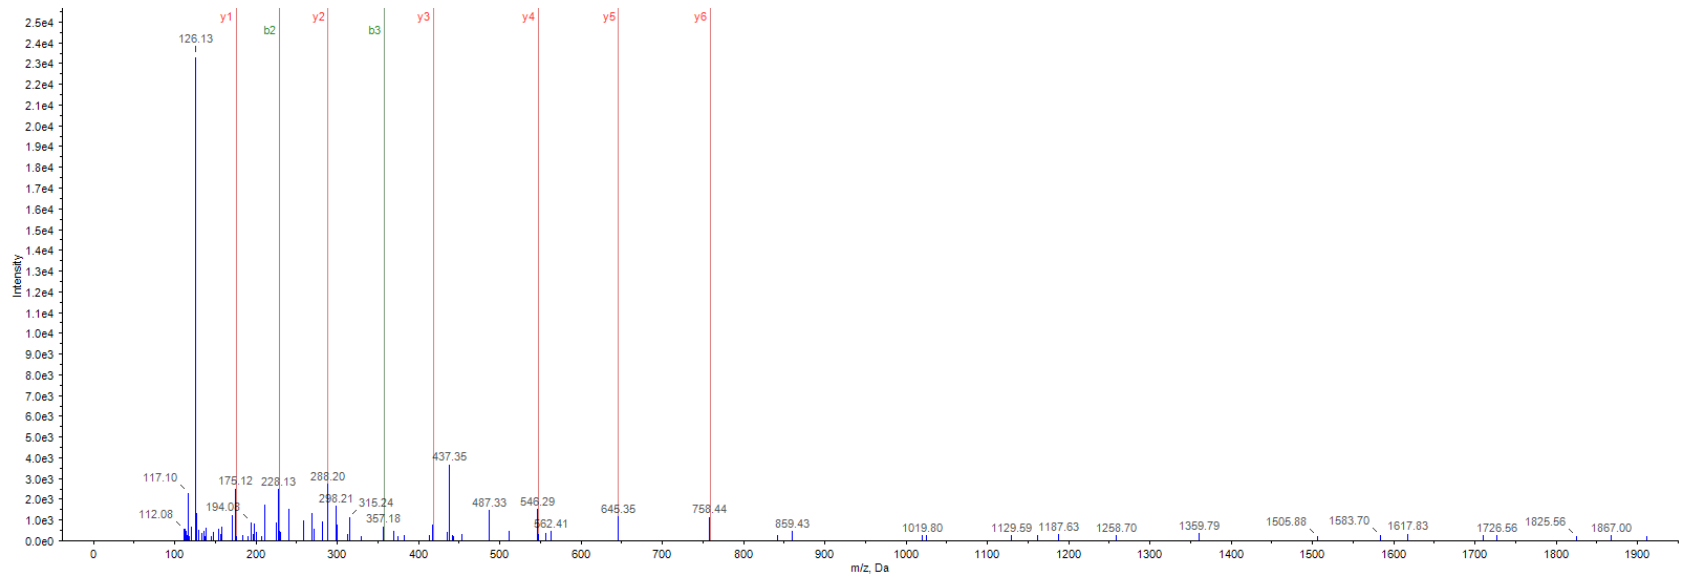

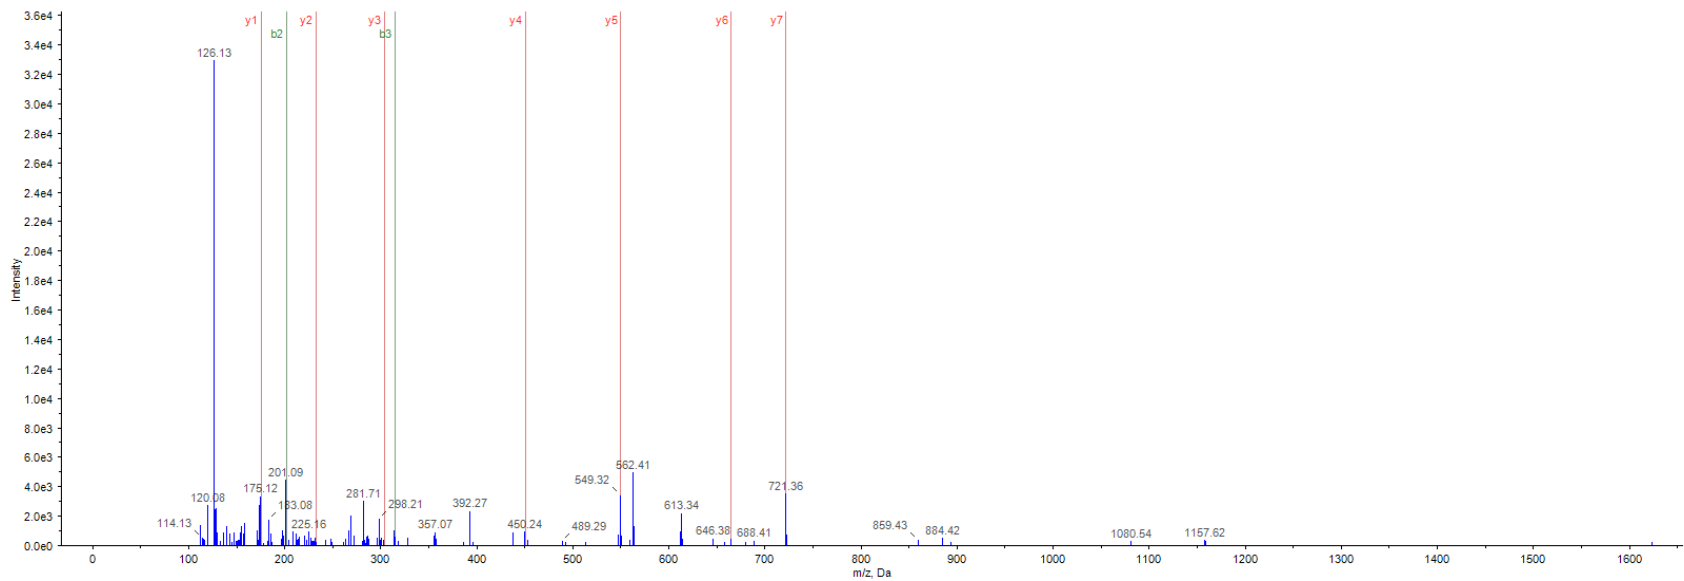

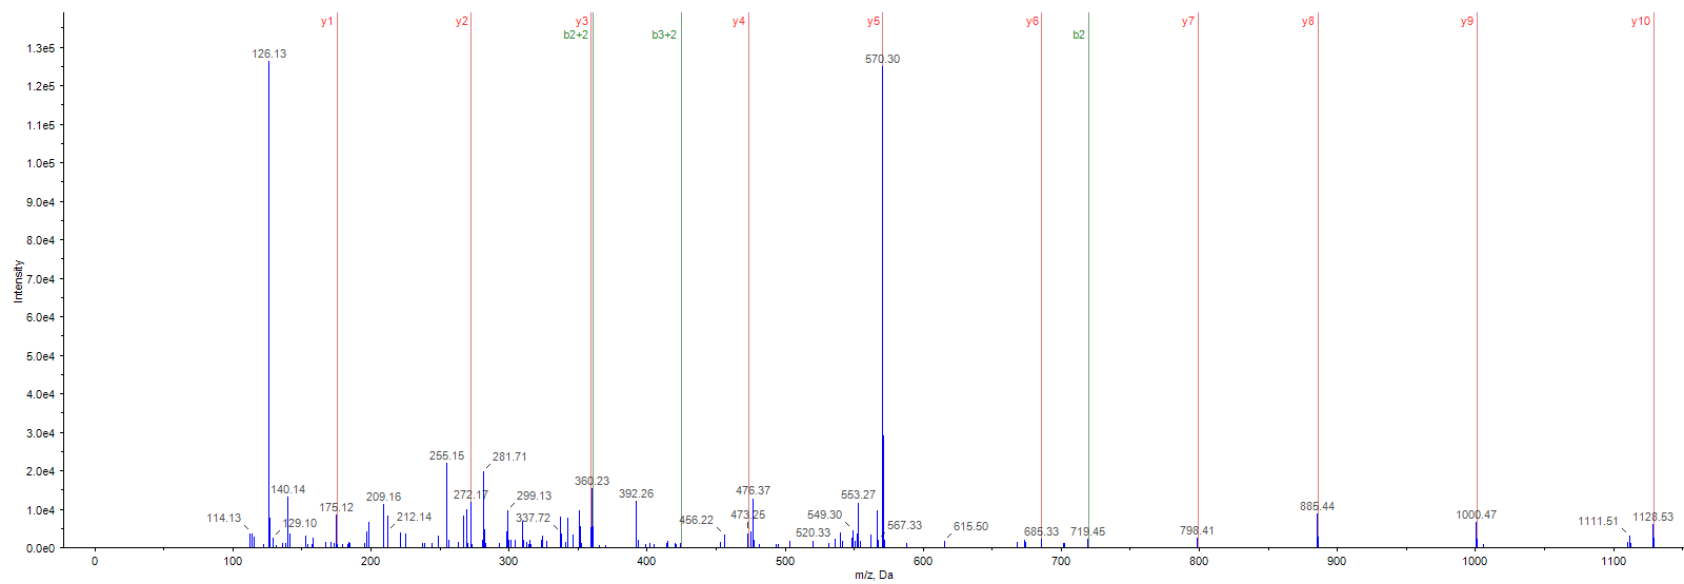



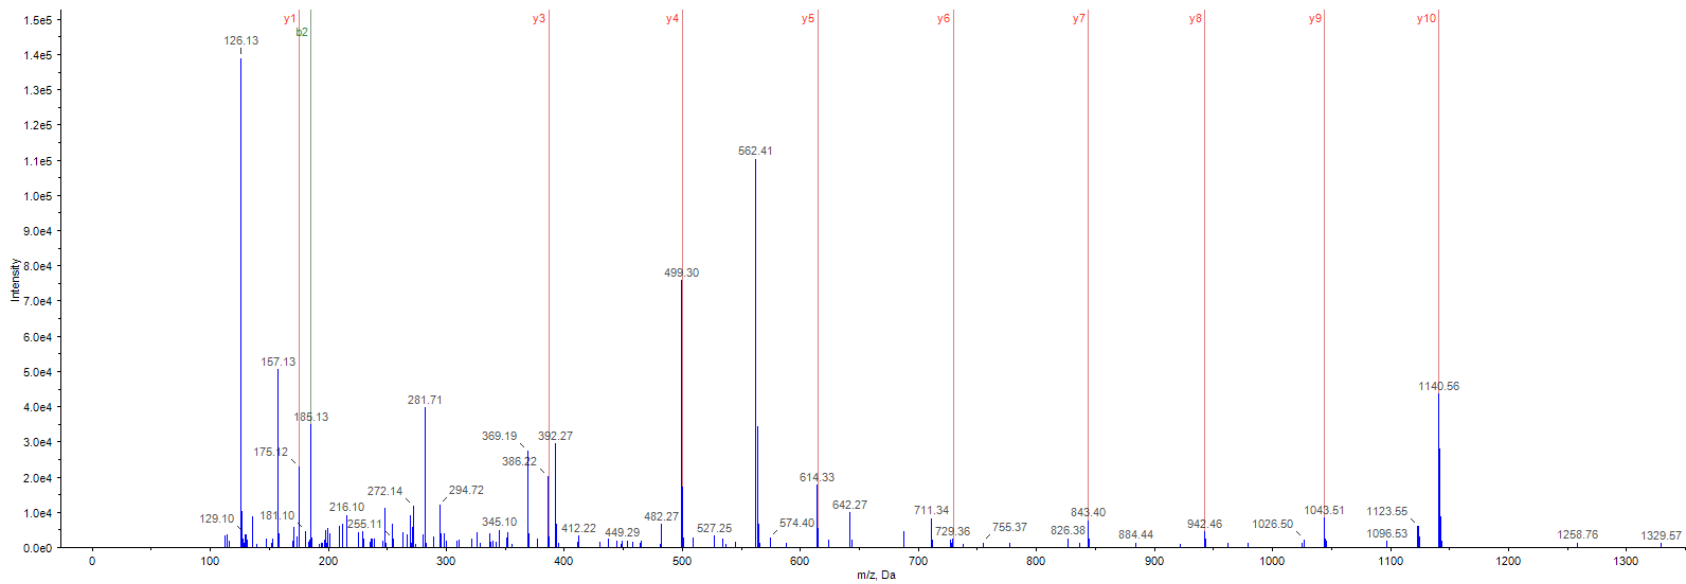

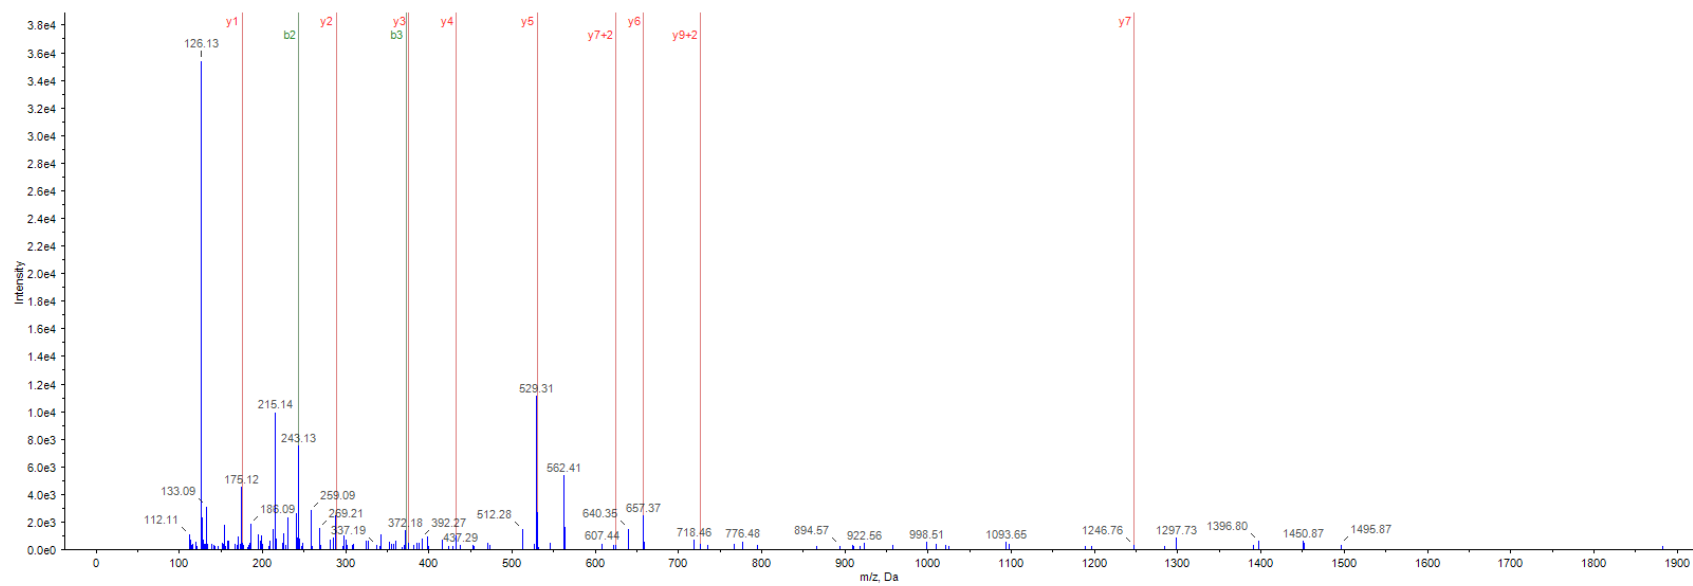

[YH(HT)VPVVVPEGSTSDTQEQLR

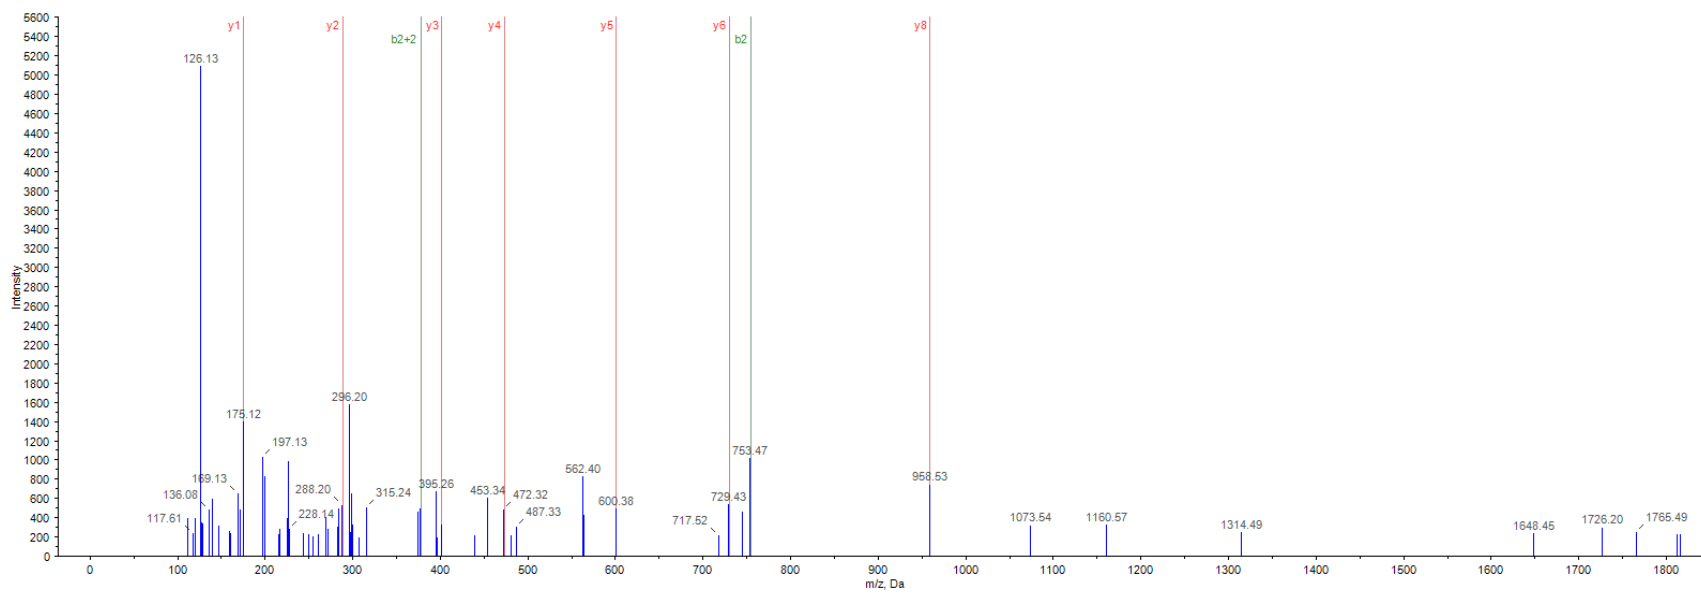

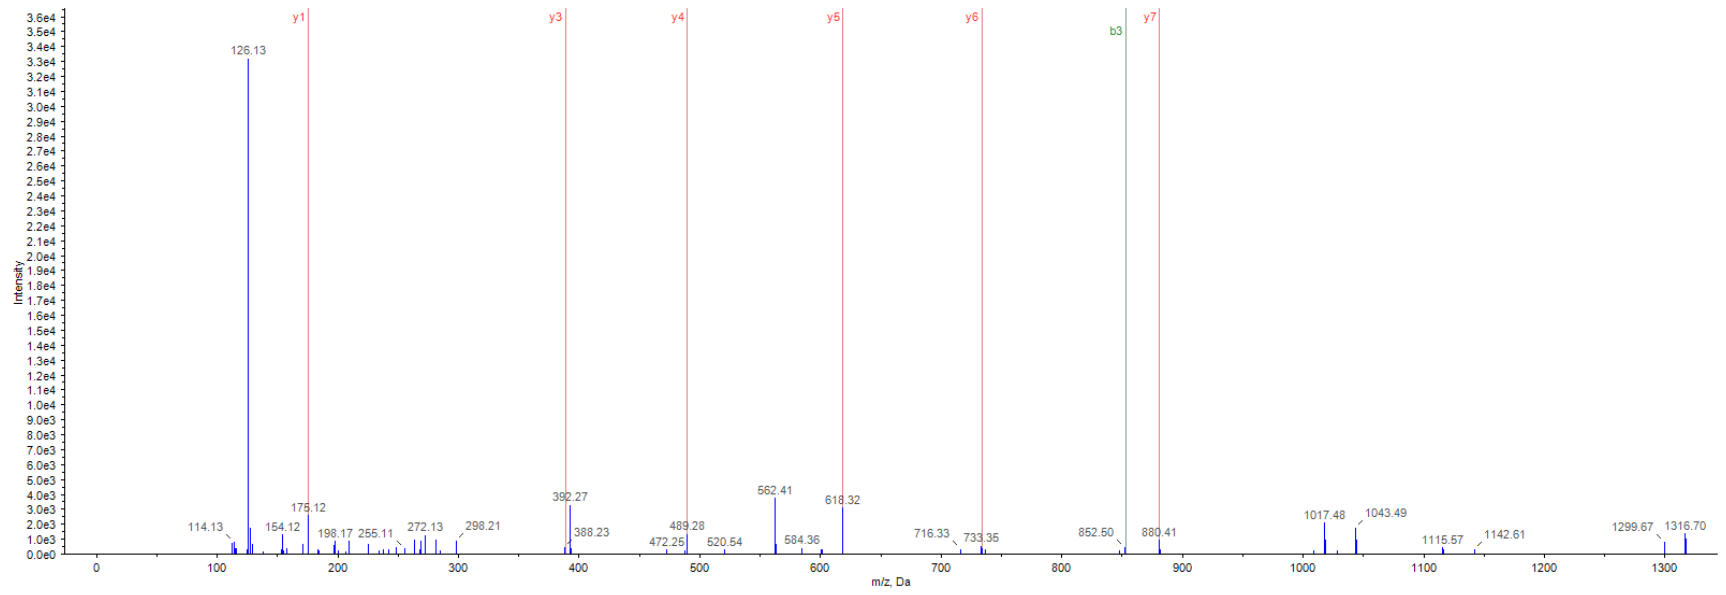

VTAEVVLVH[HT]PQGGSTR

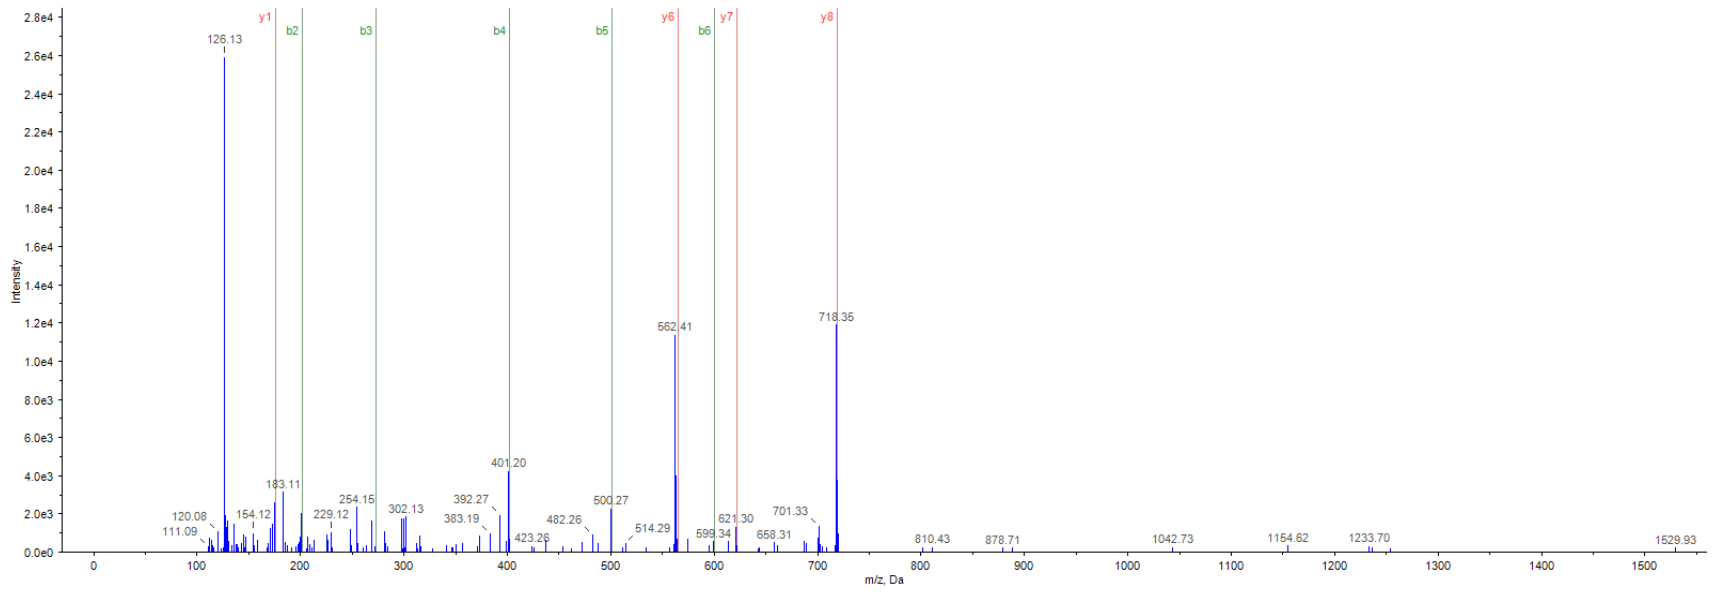

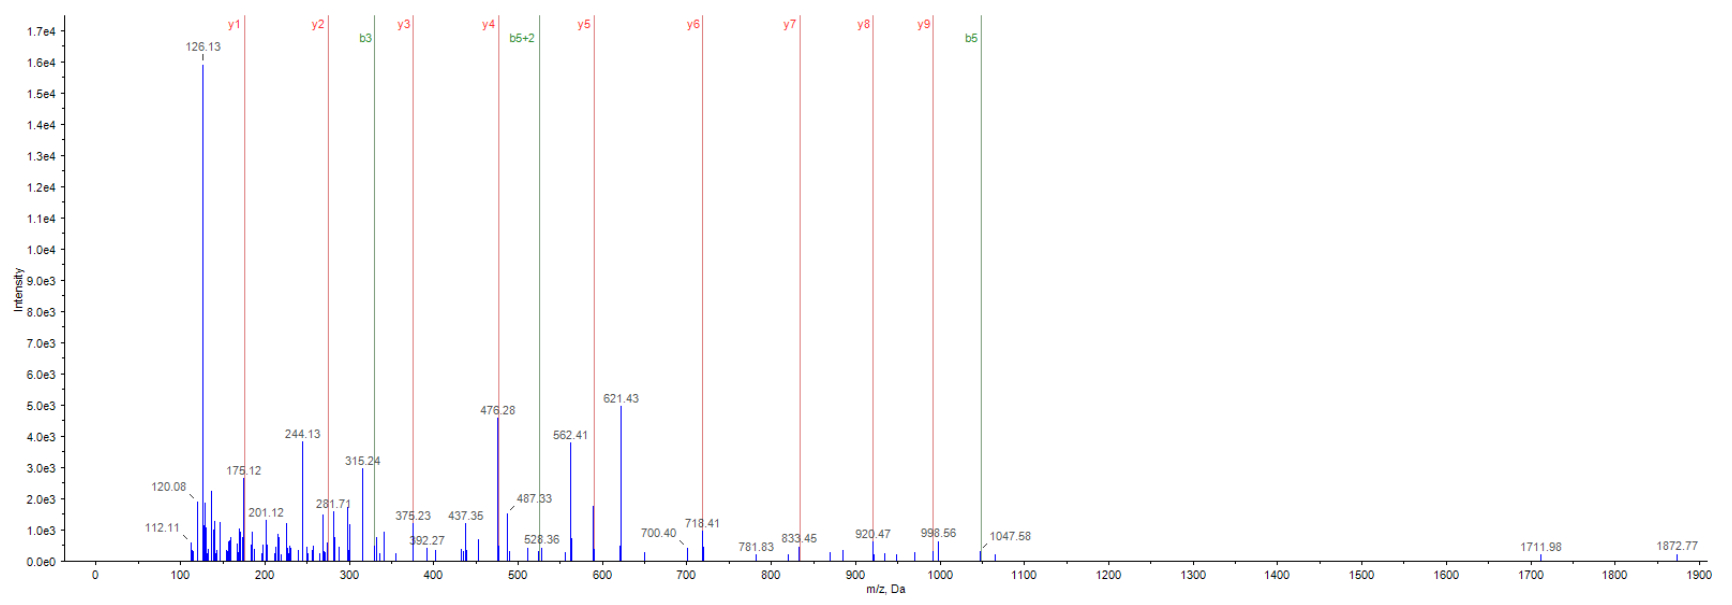

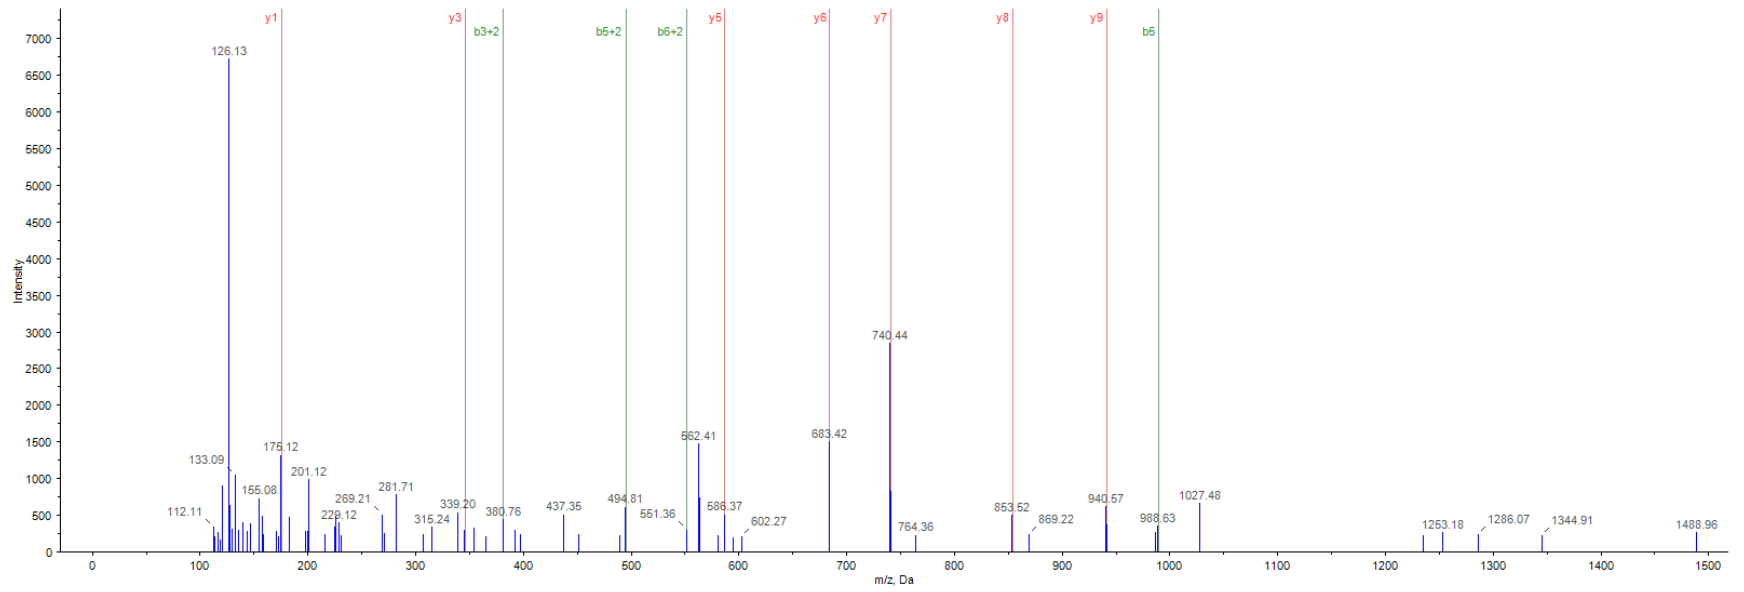

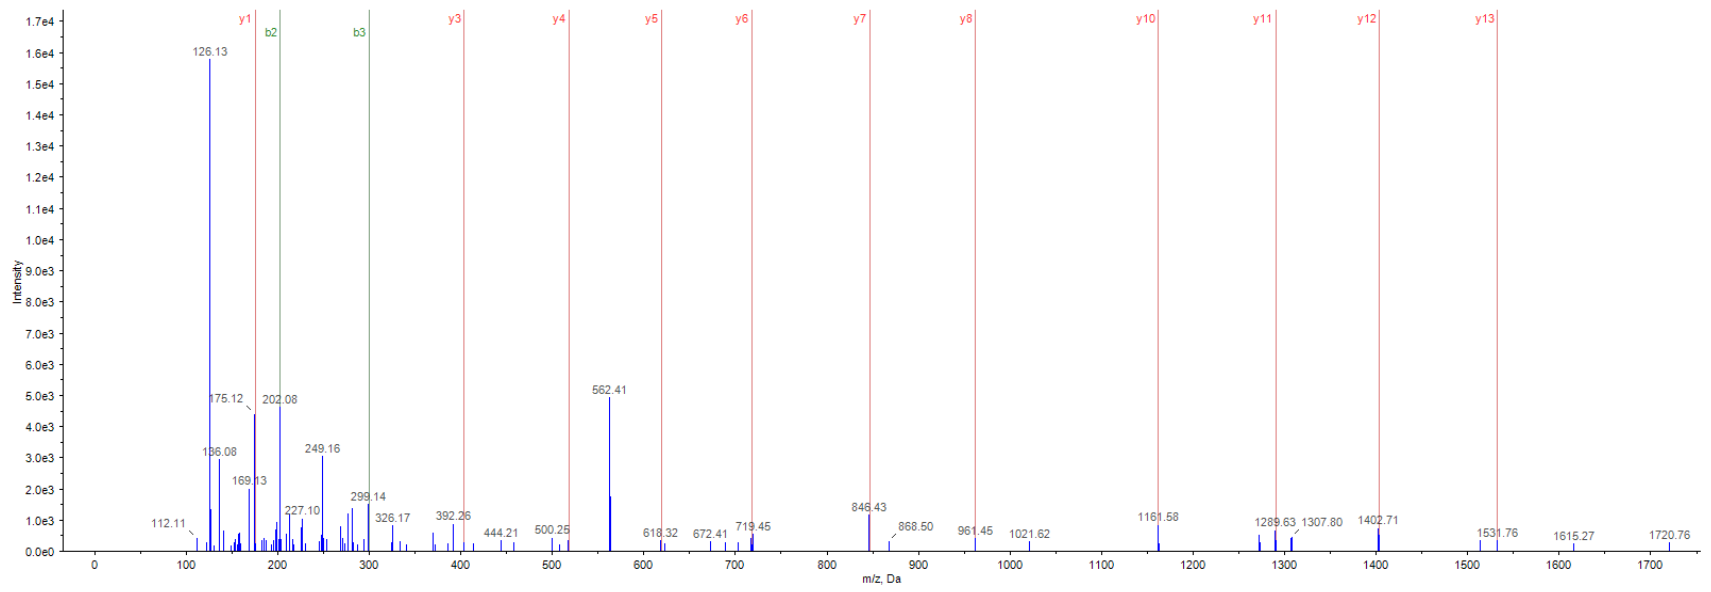



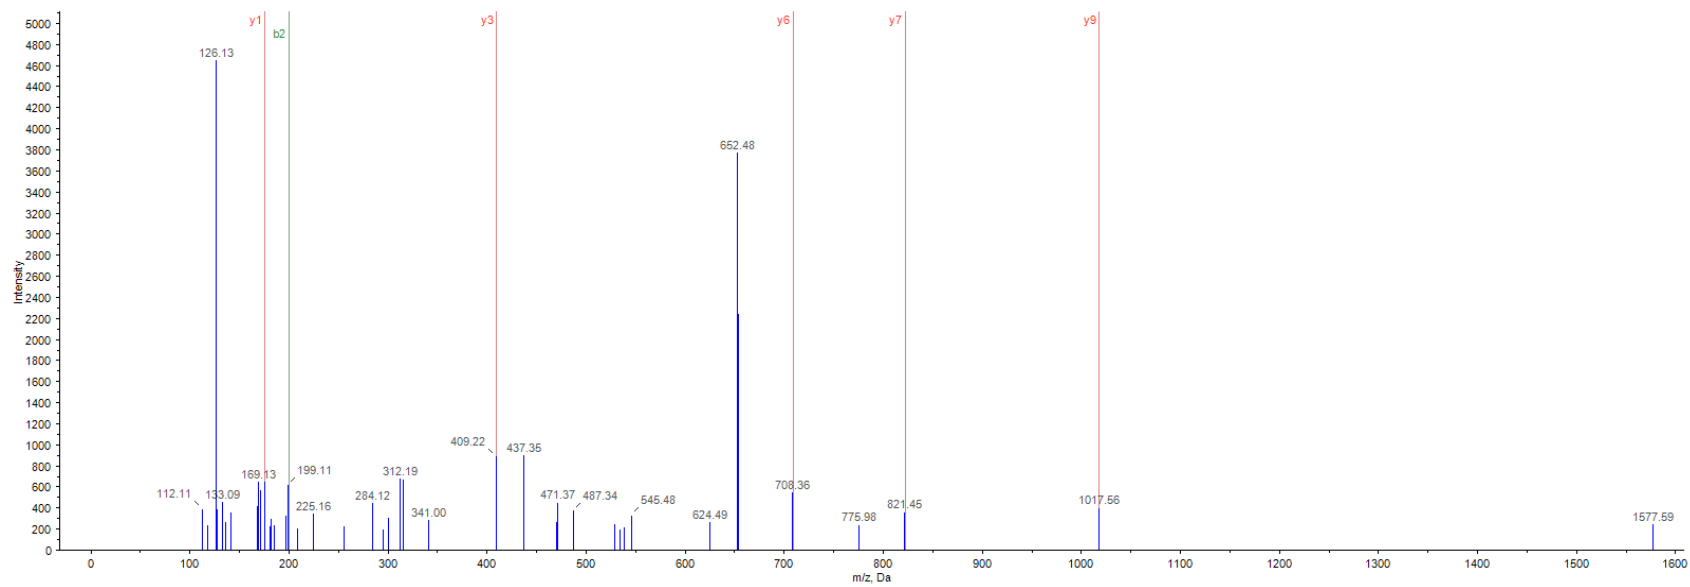

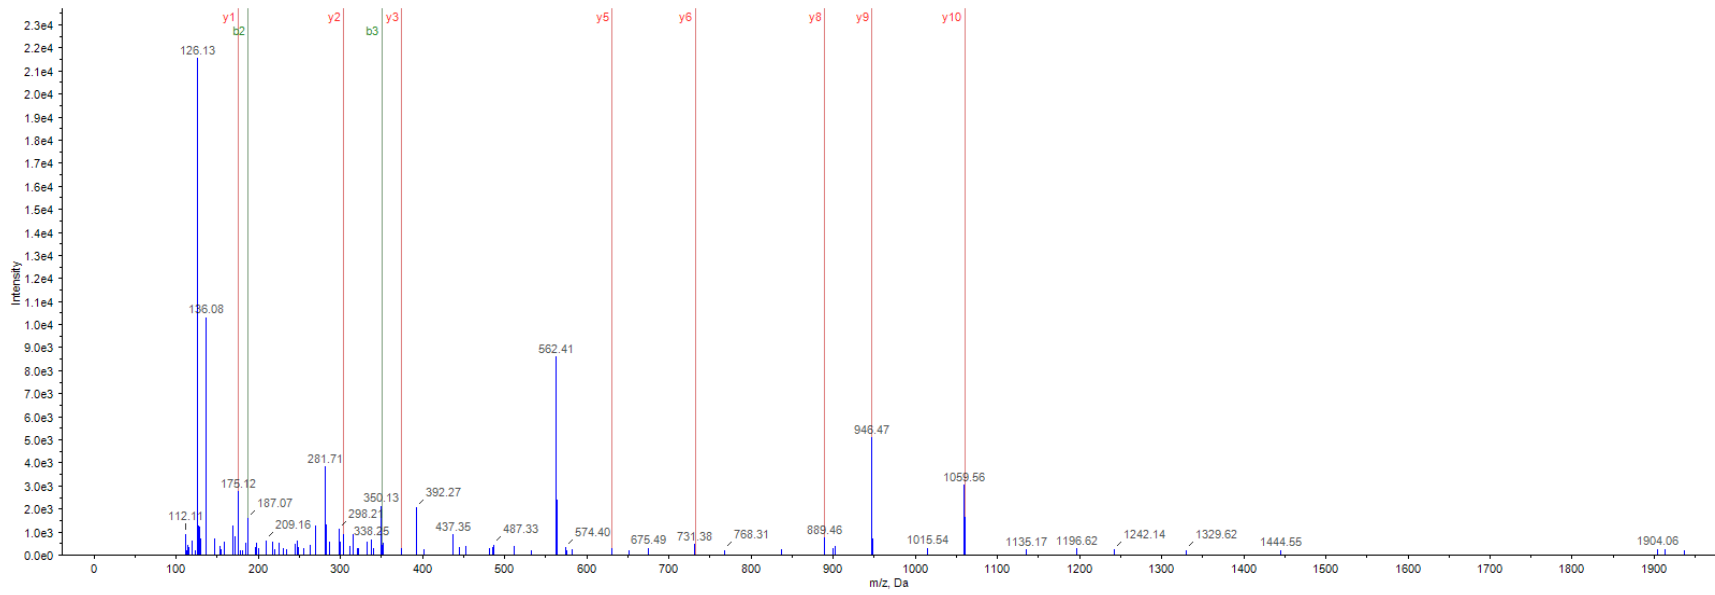

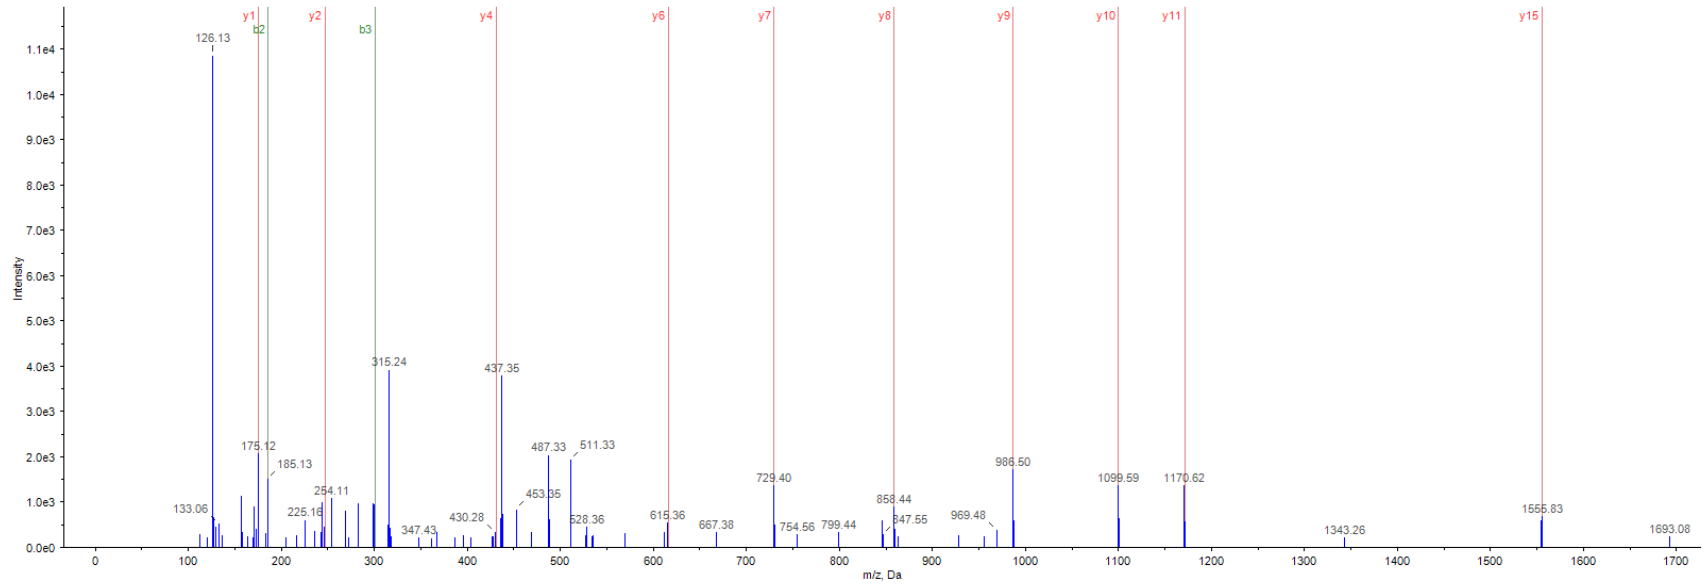

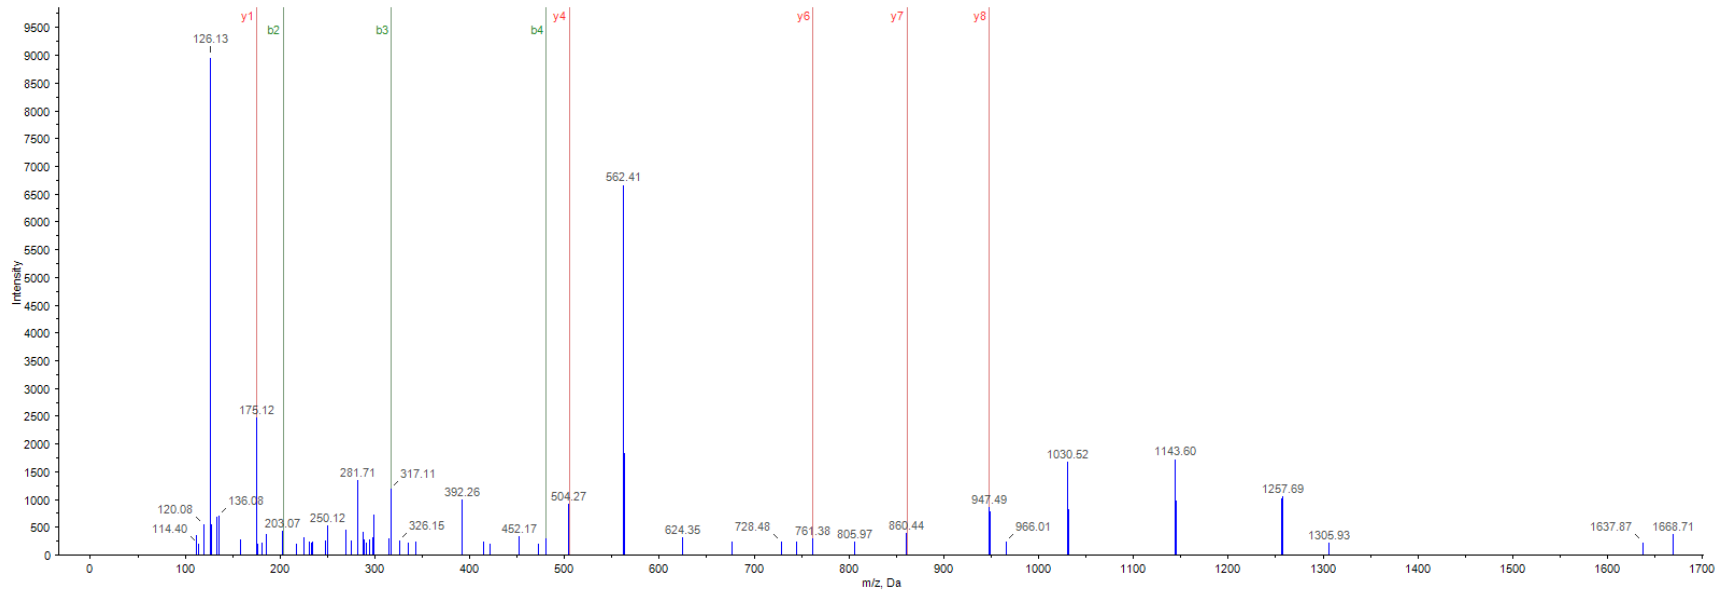

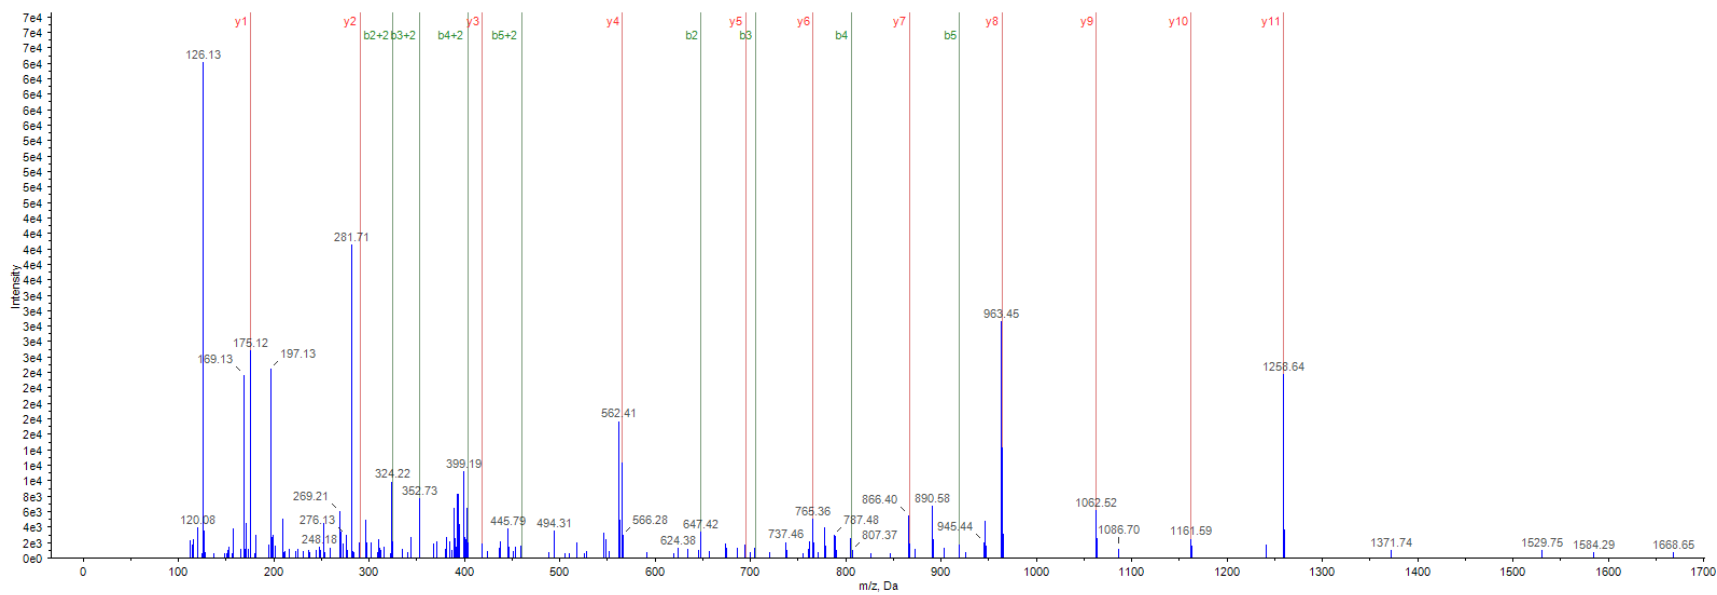

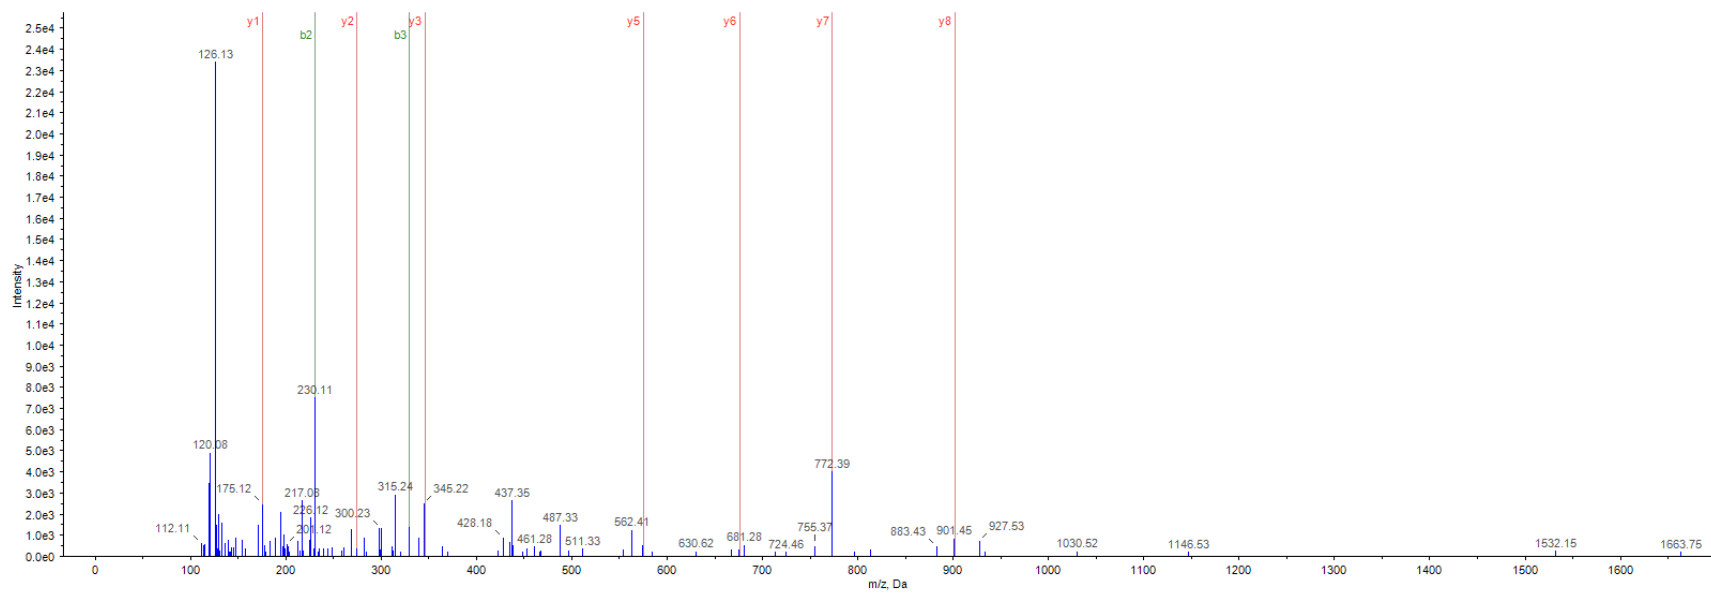

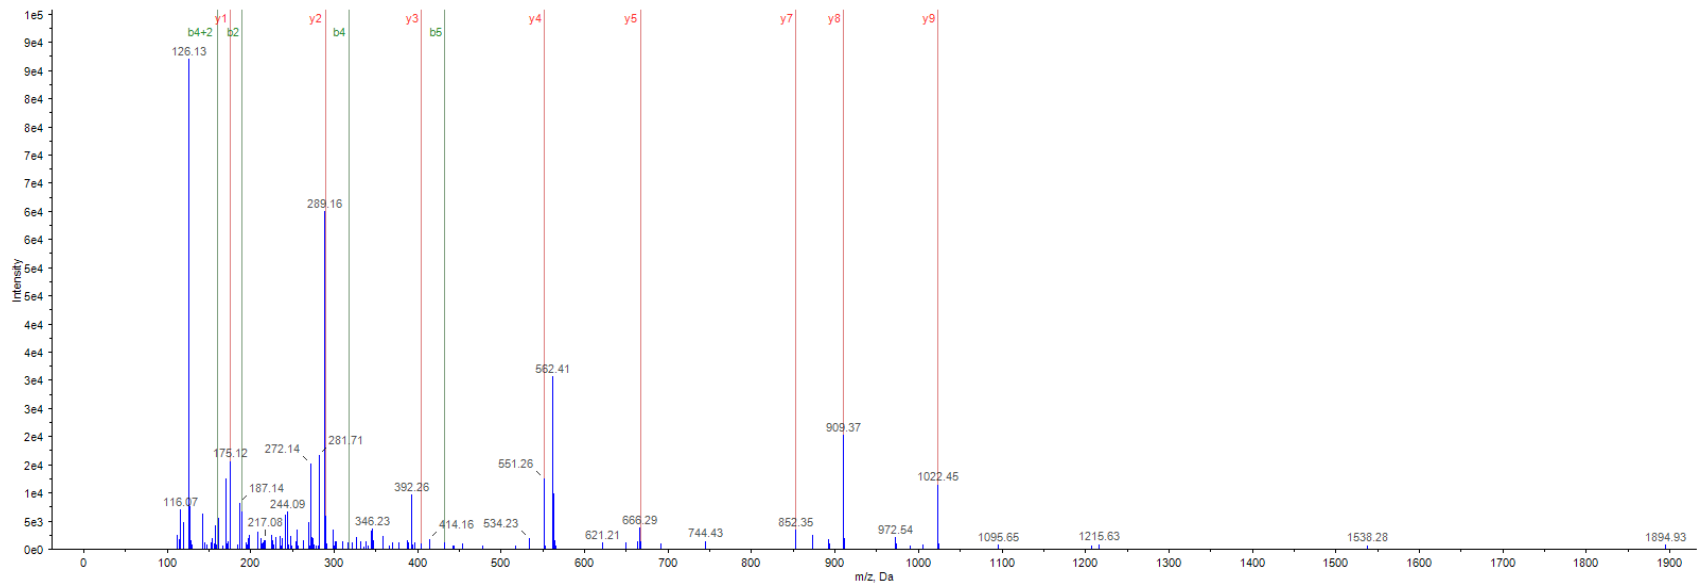

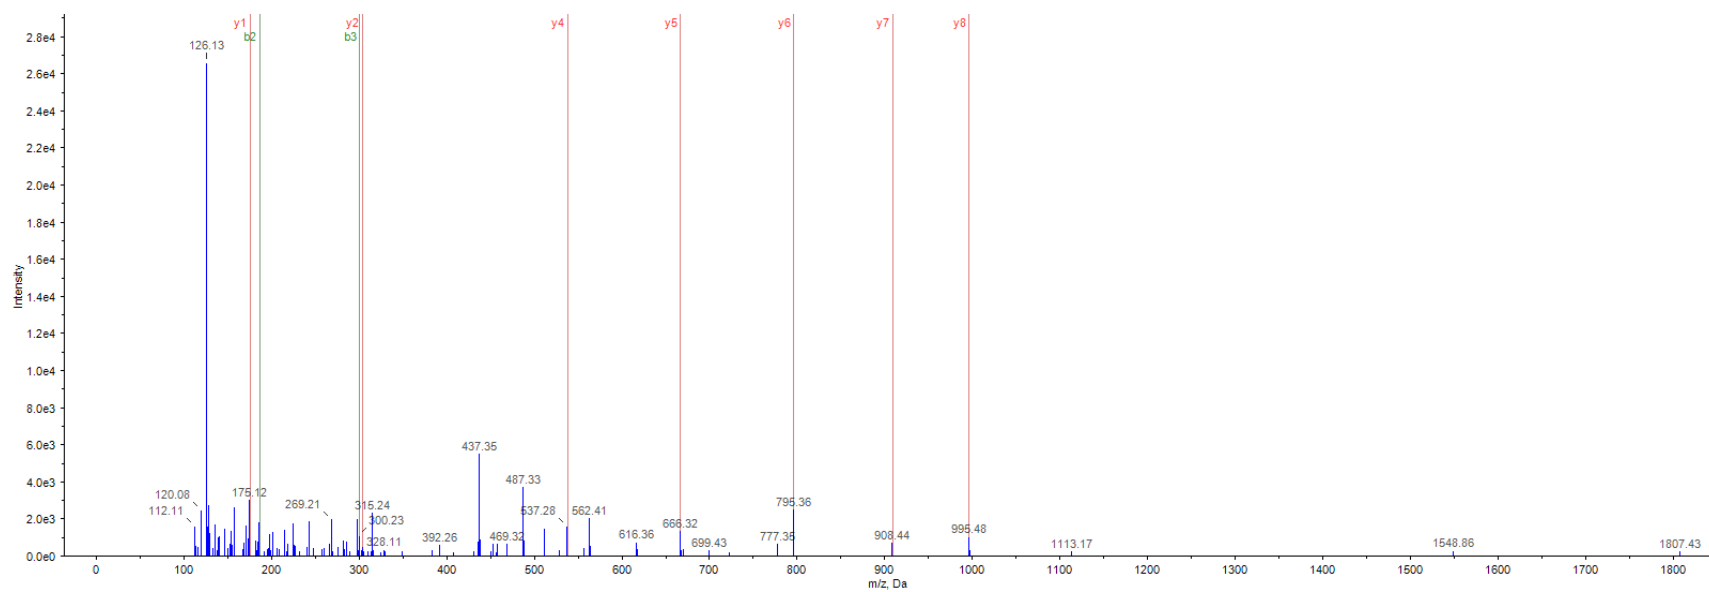



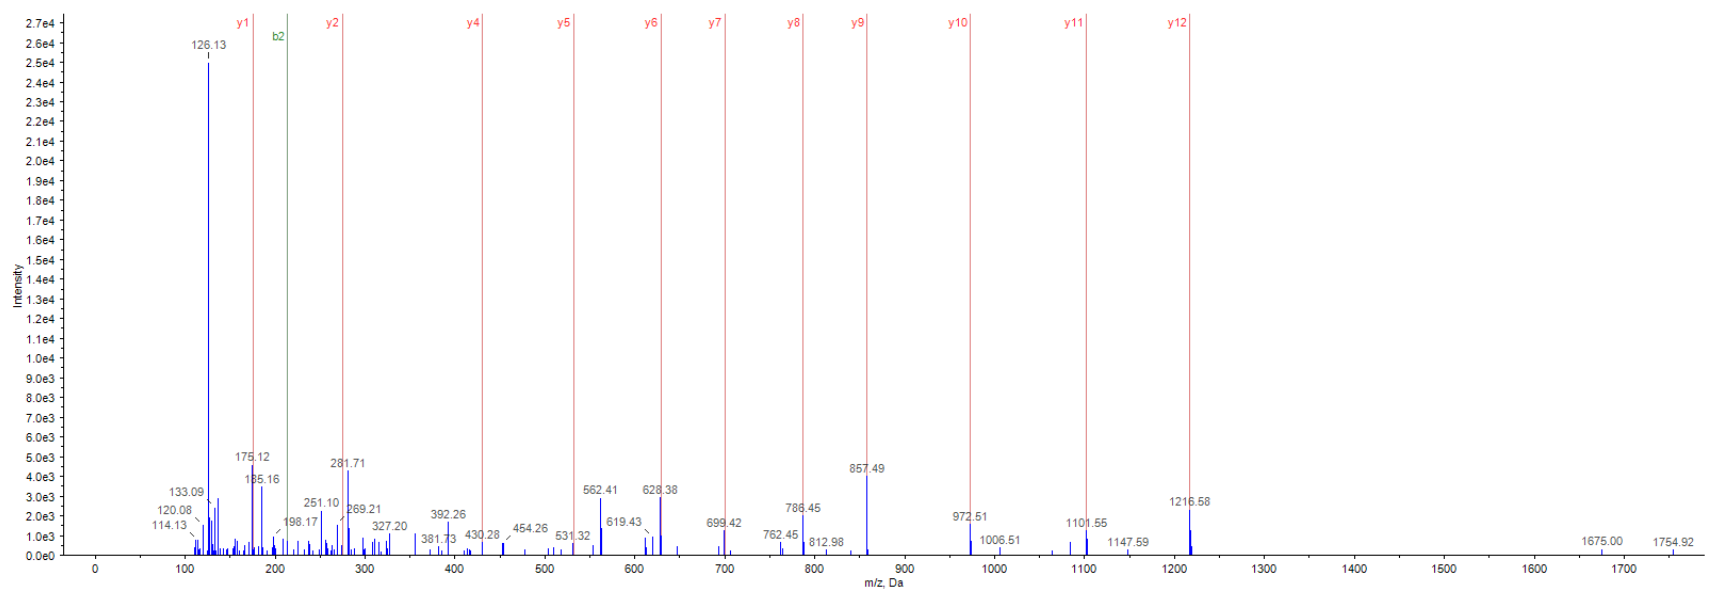

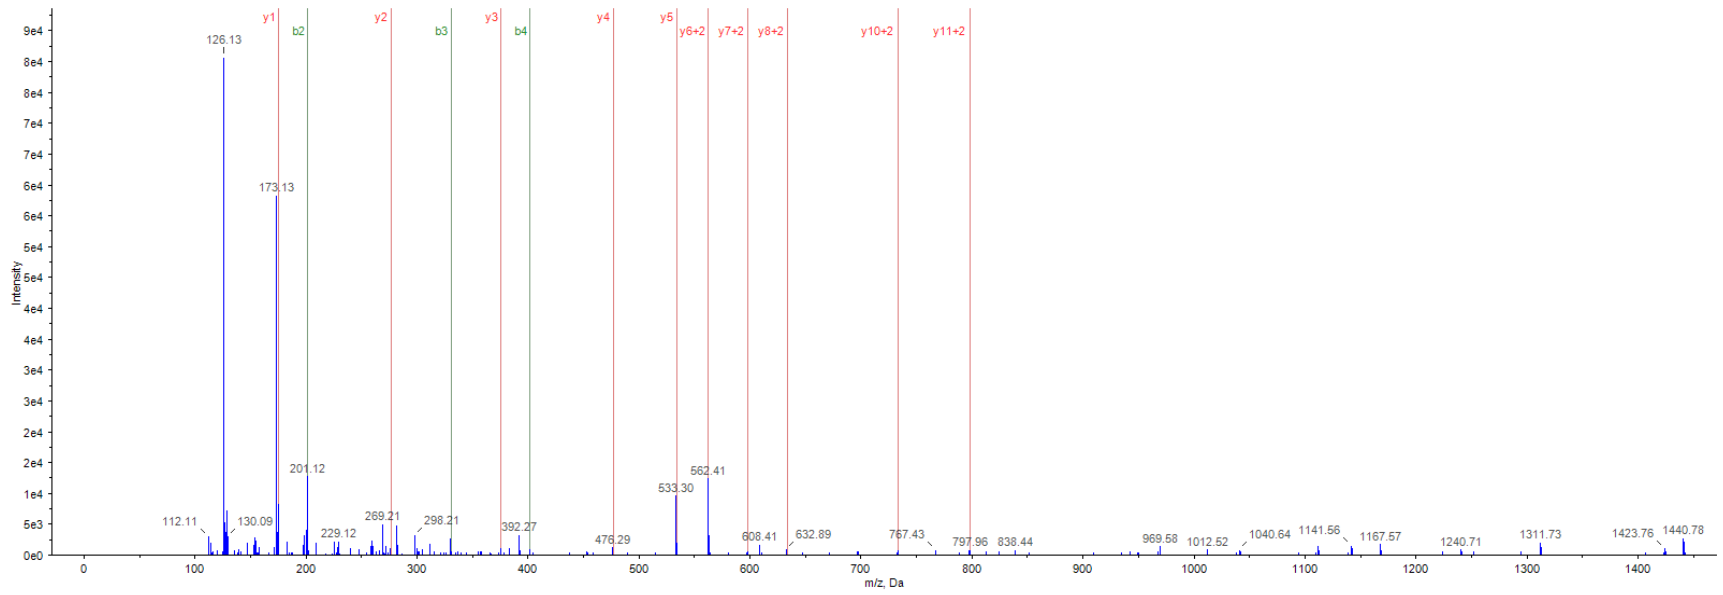

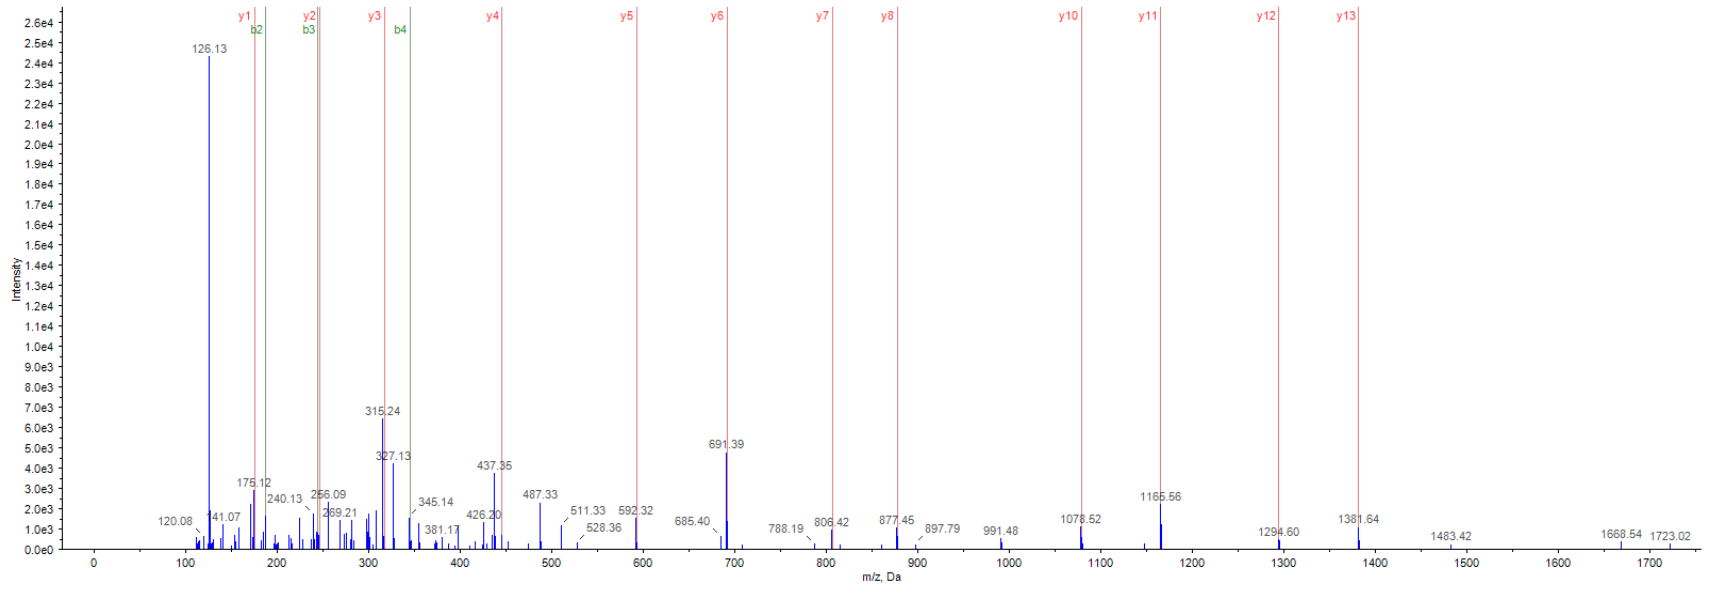

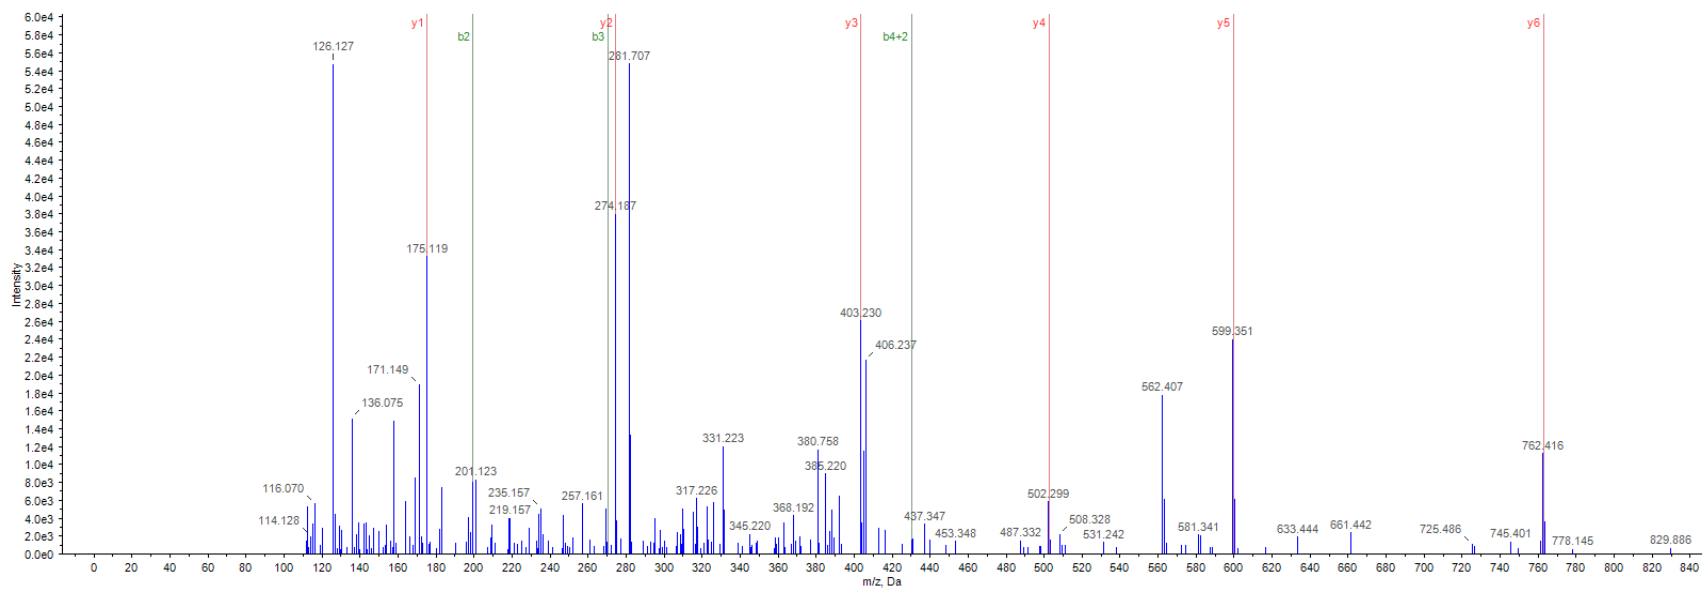

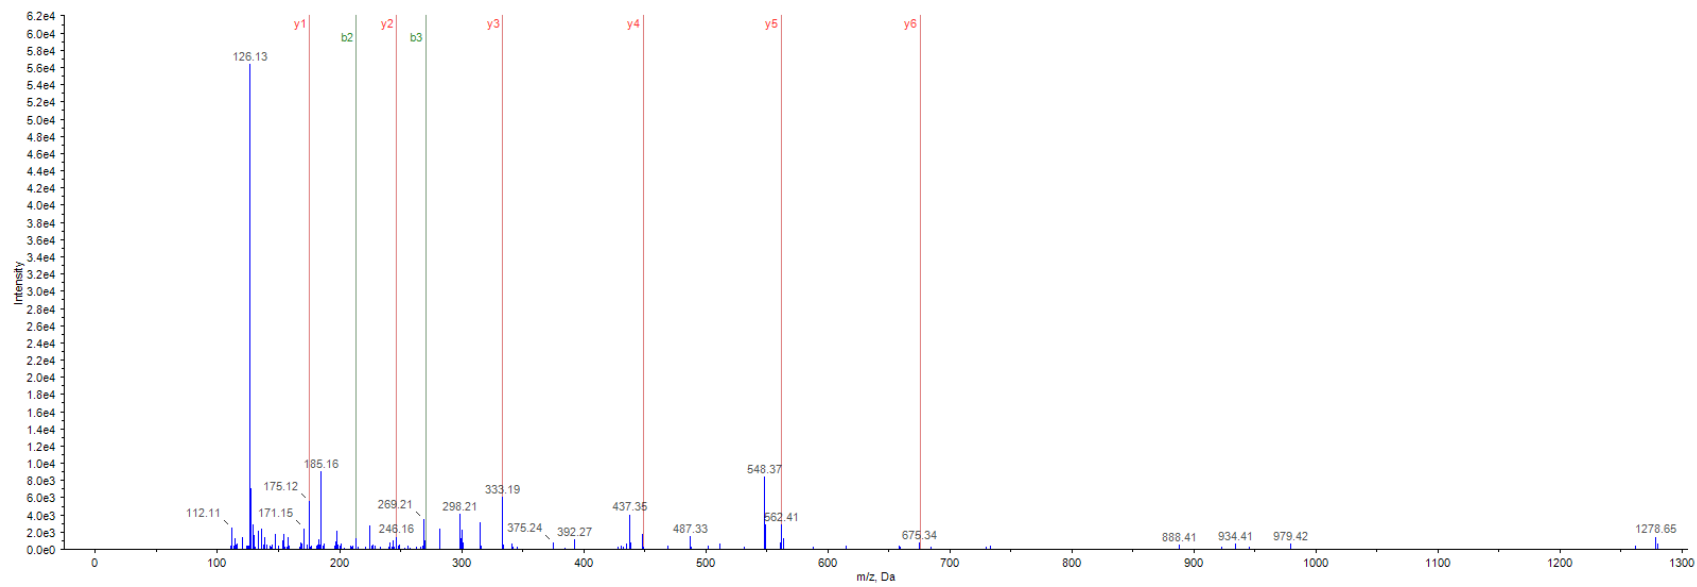

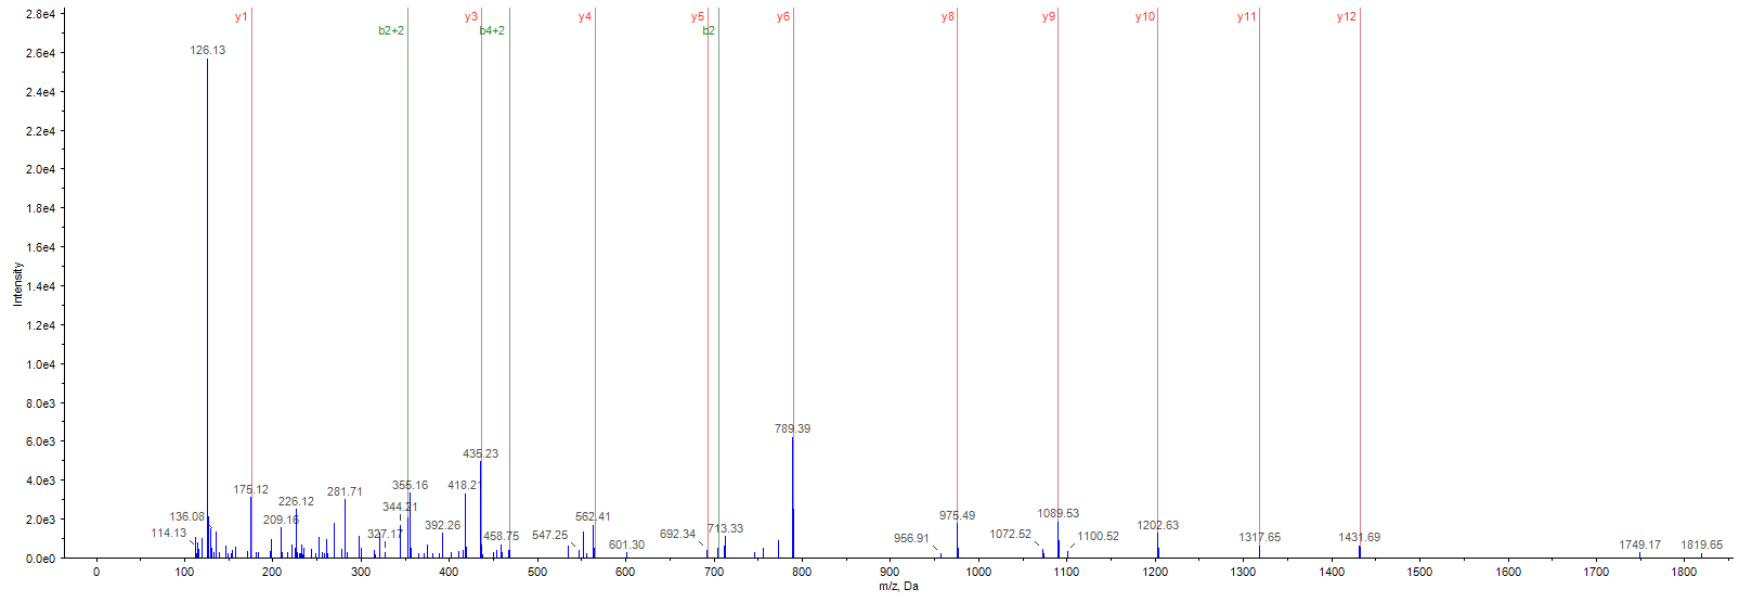

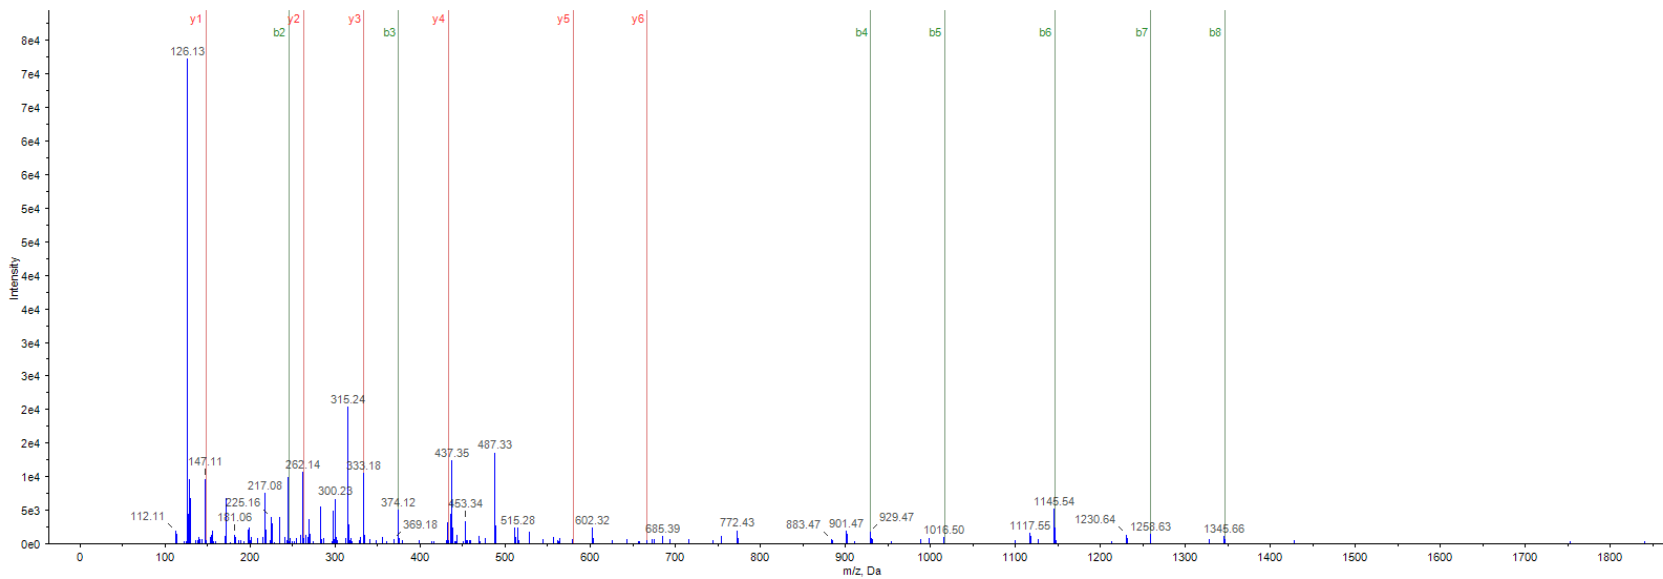

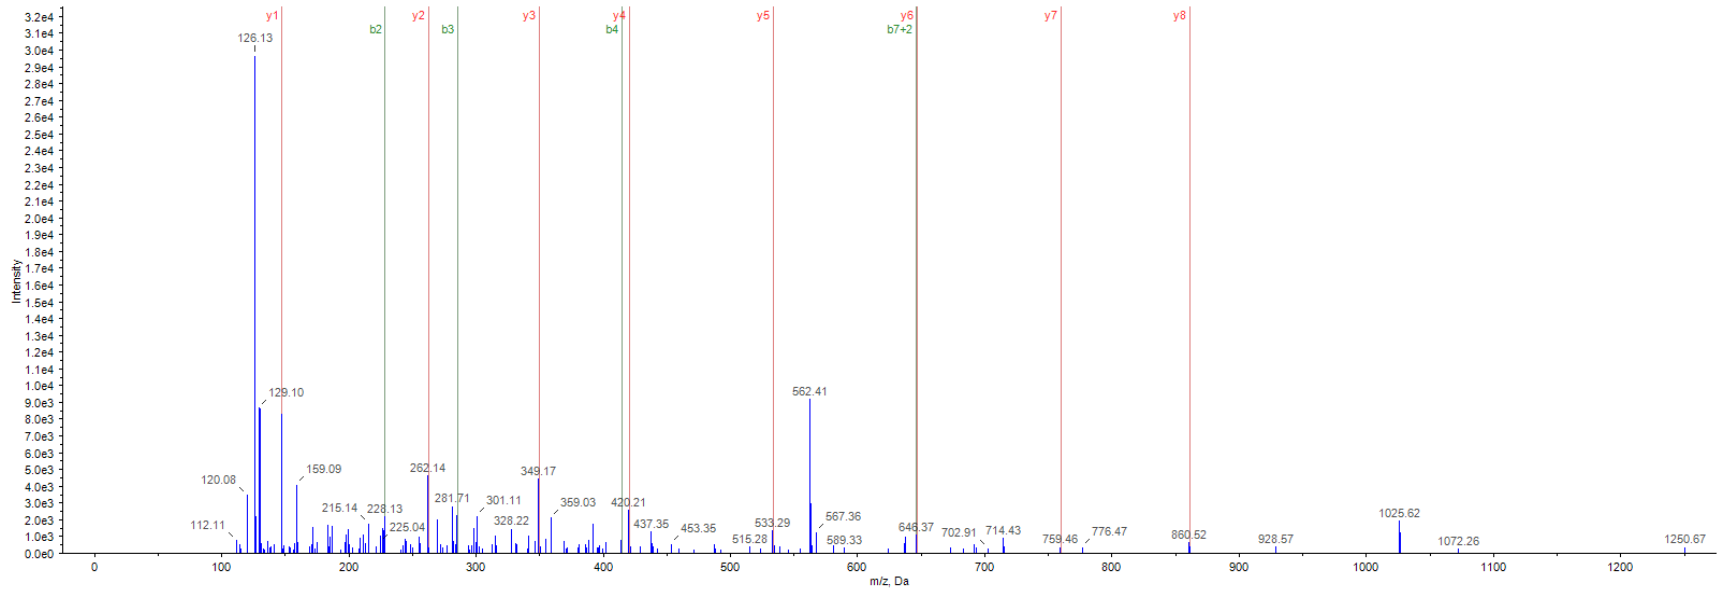



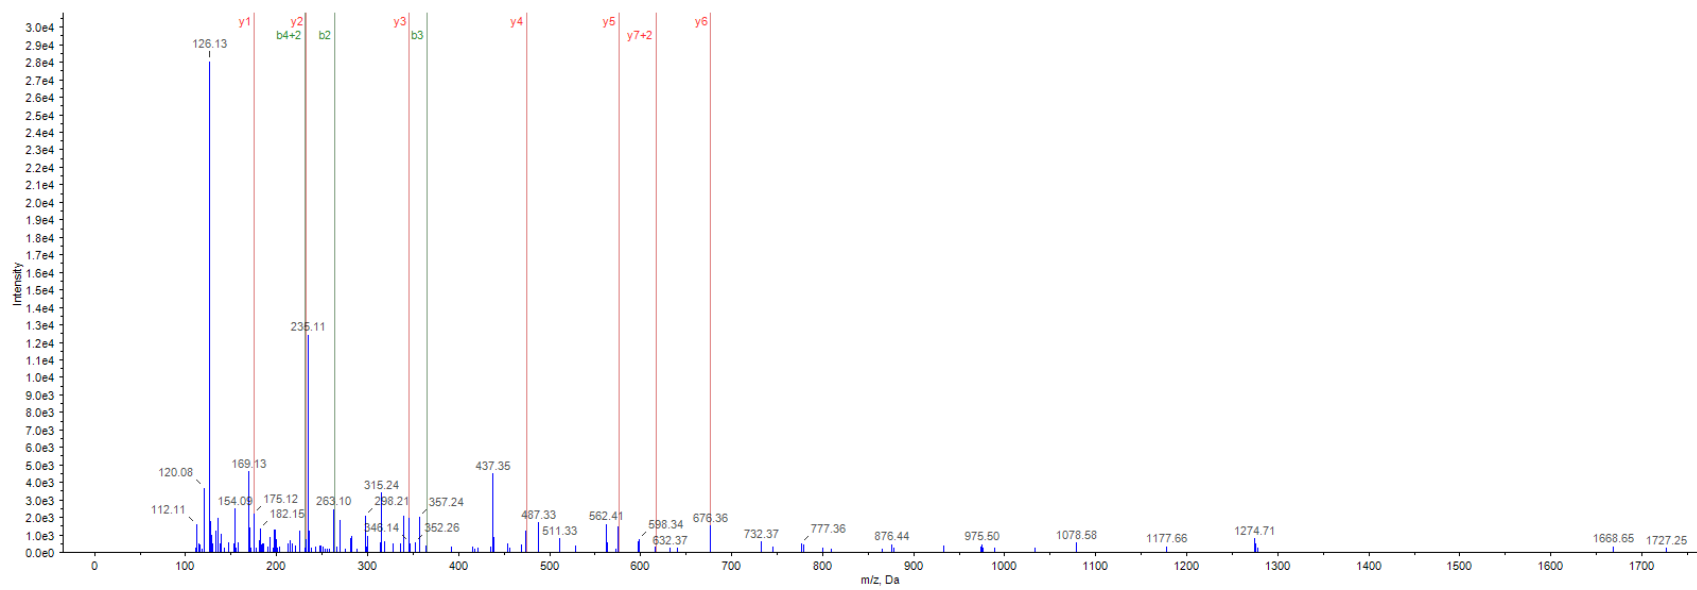

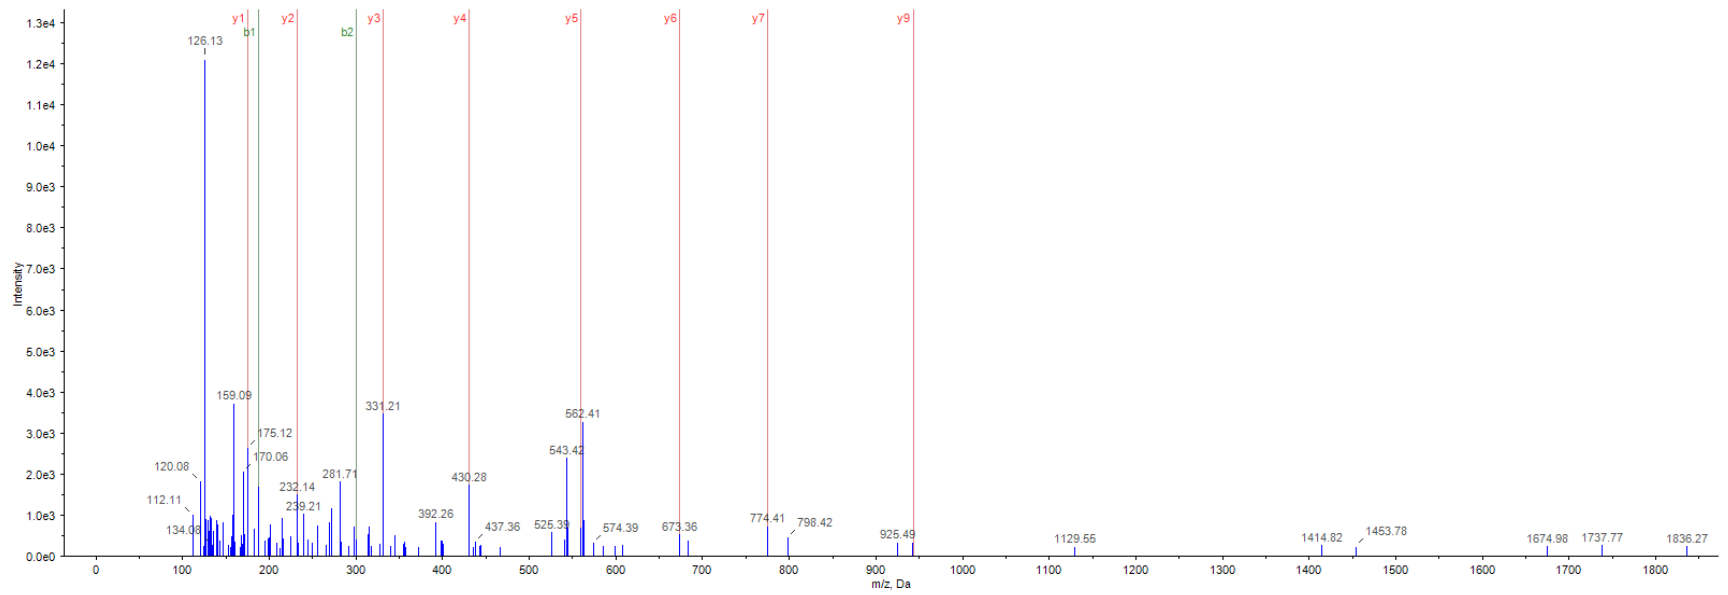

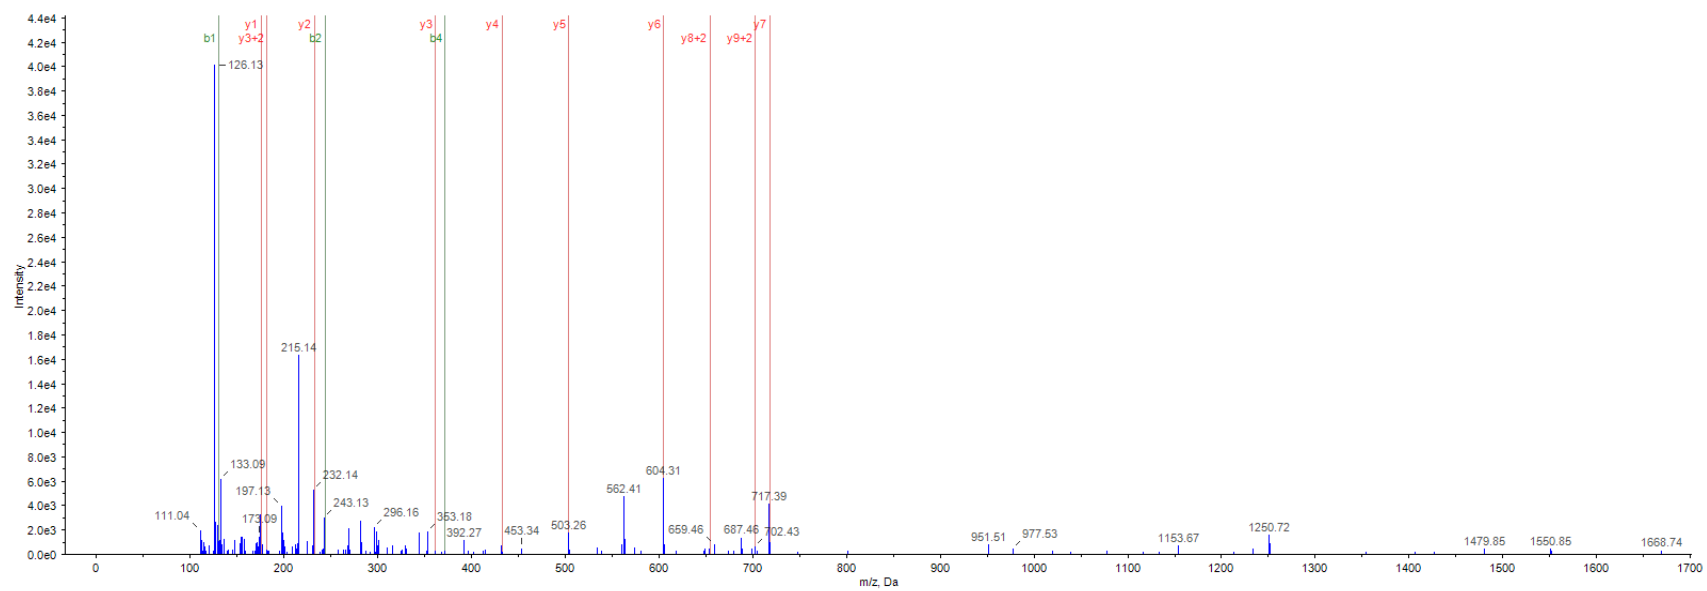

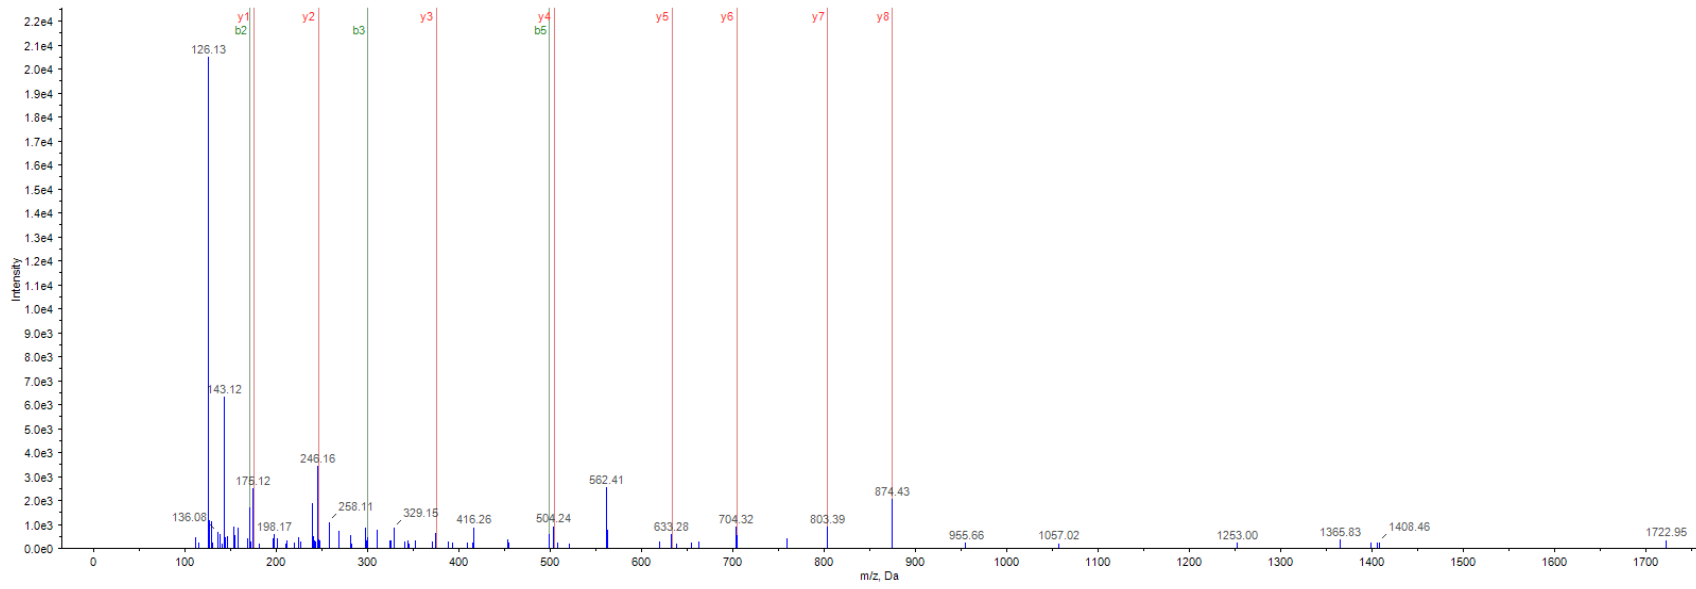

NYPEGH[H]QAAAVLPVLDLAQR

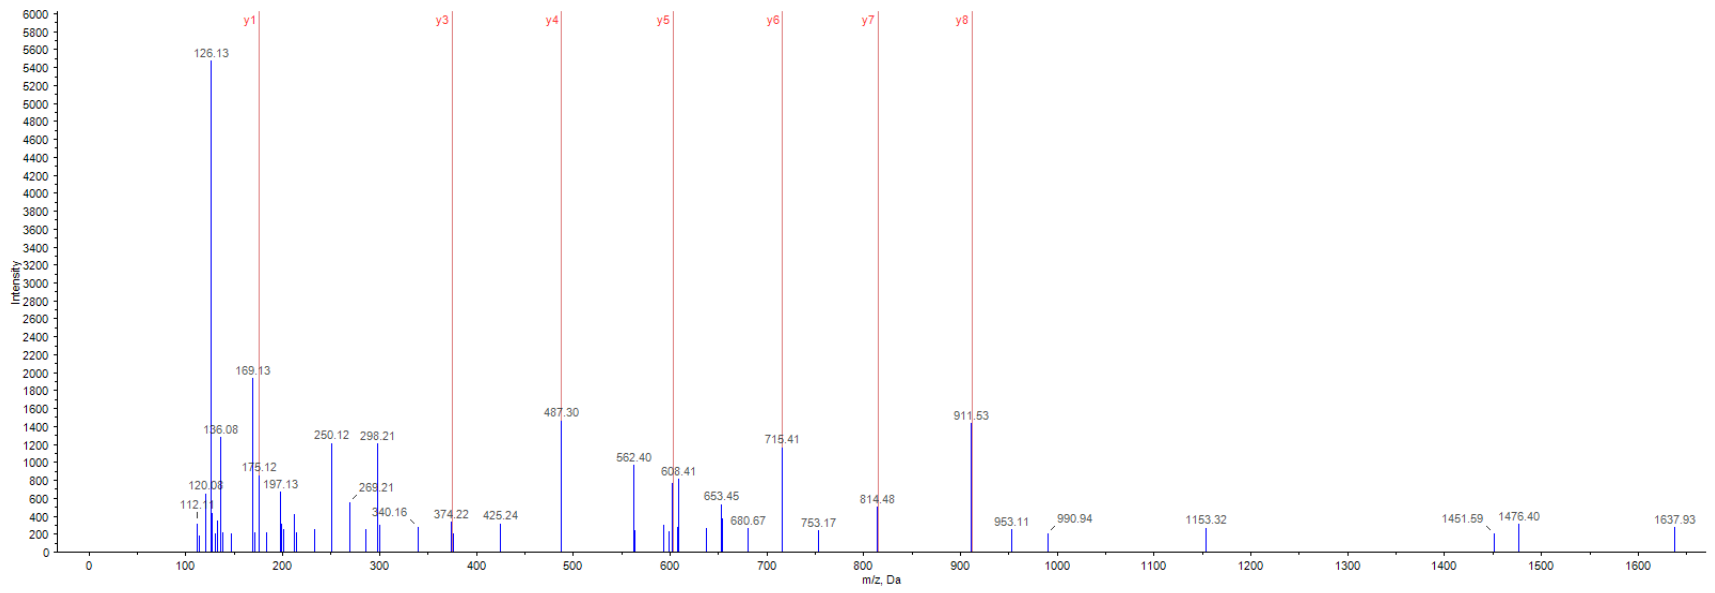

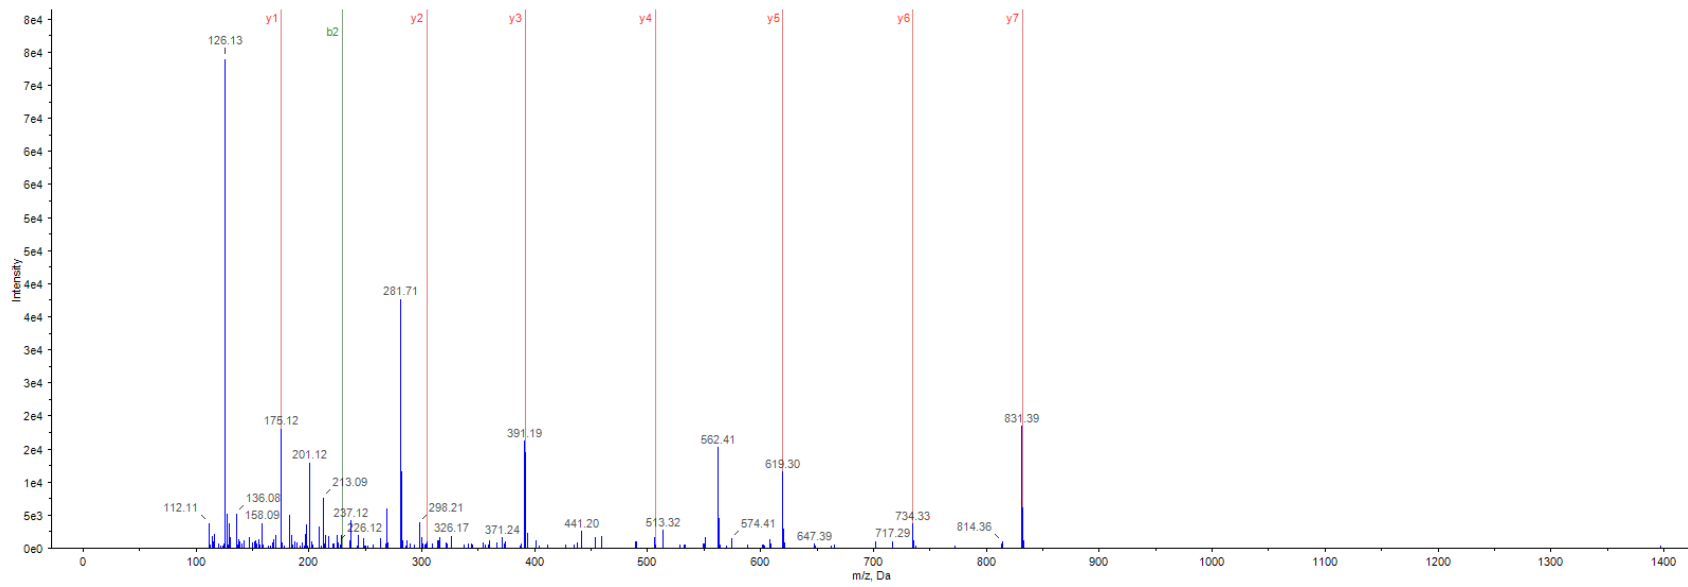

[H]HTVLQQFADNDVSR

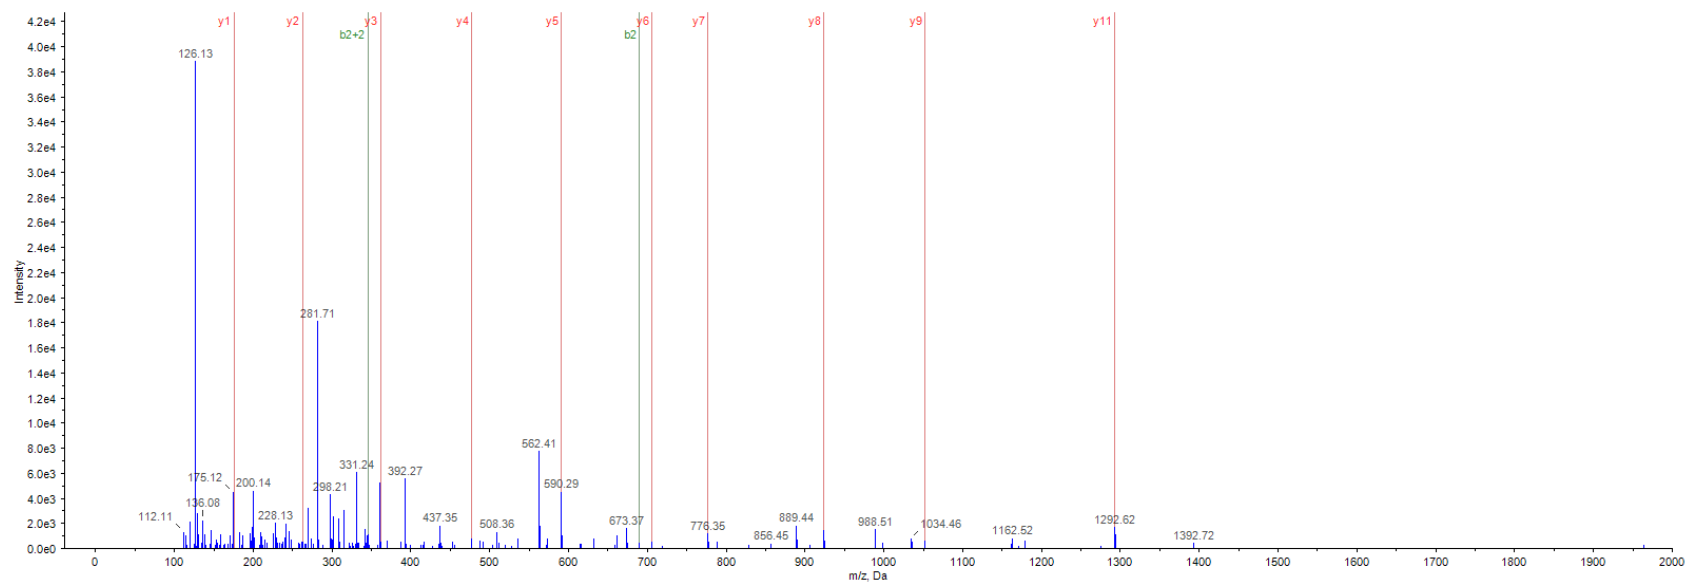

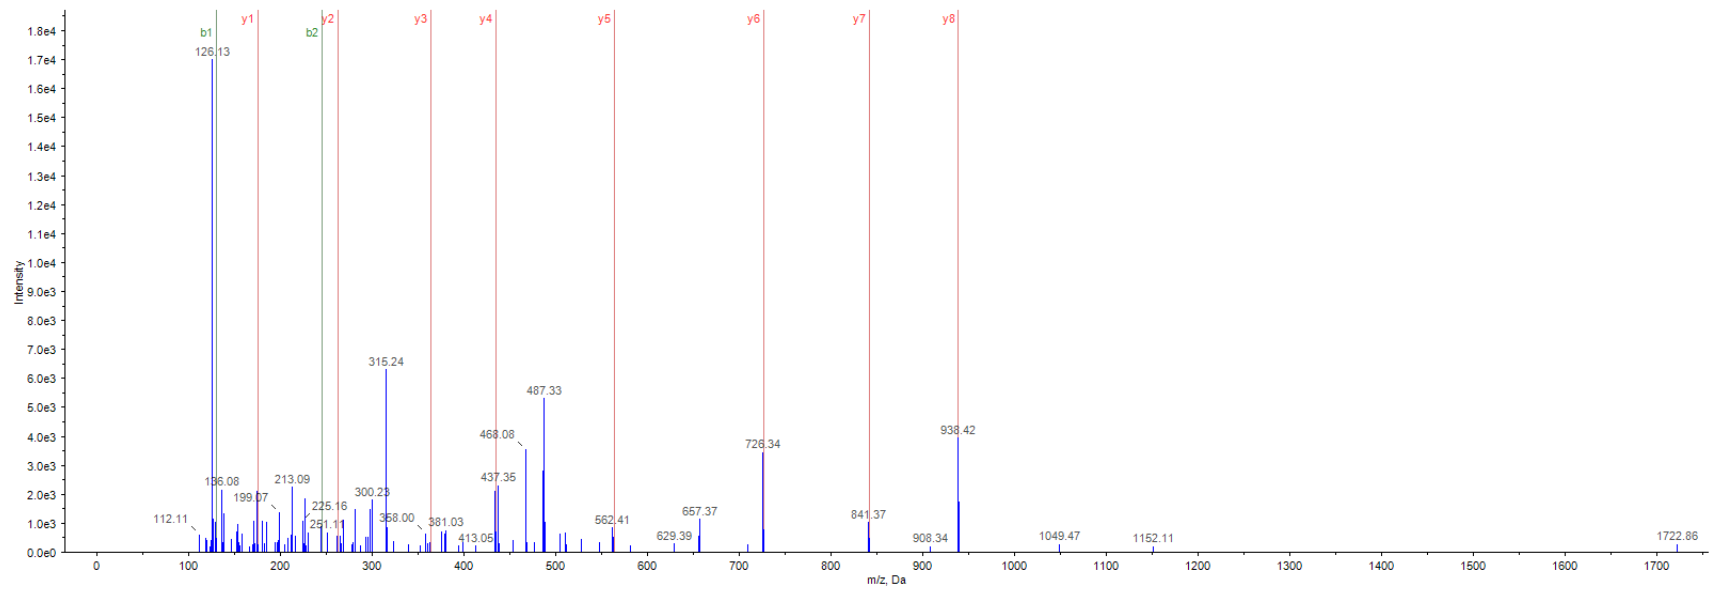



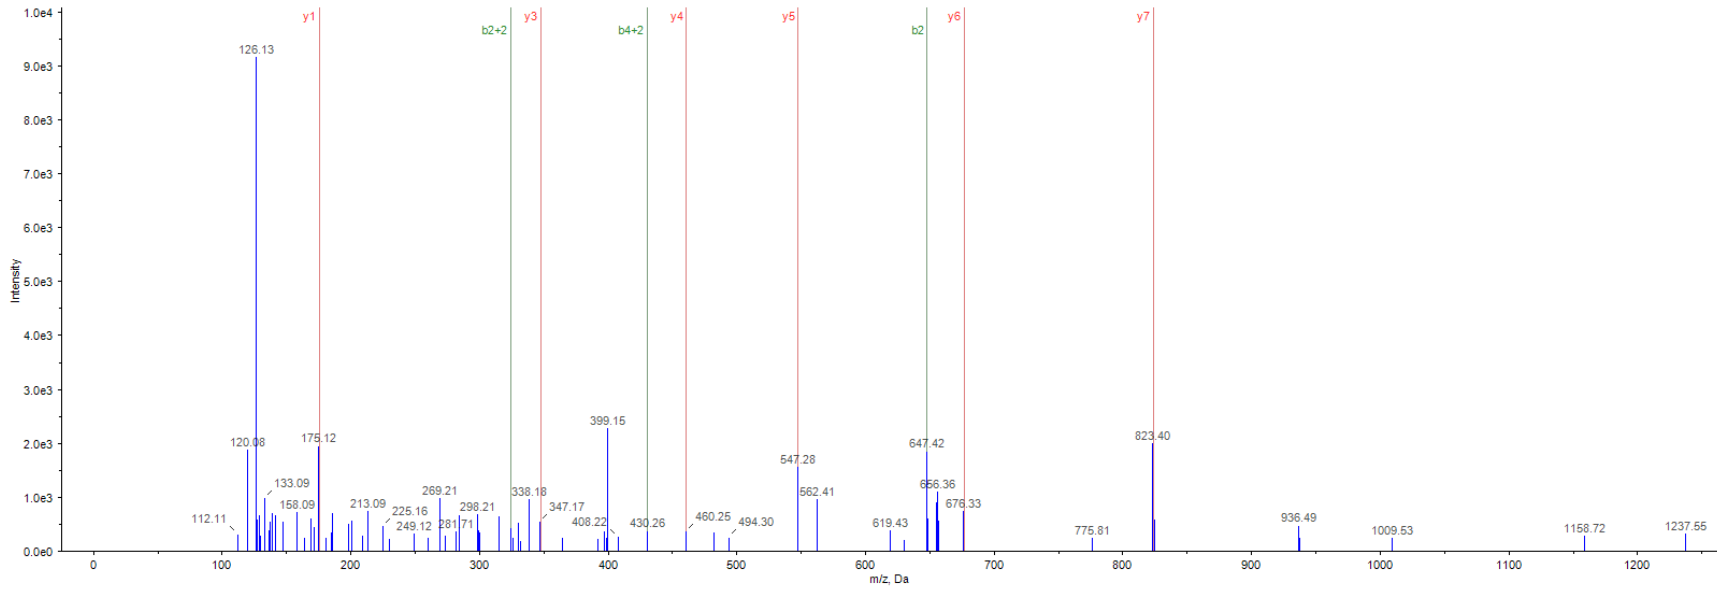

TGGDAAAPGAAGTQALPH[HT]R

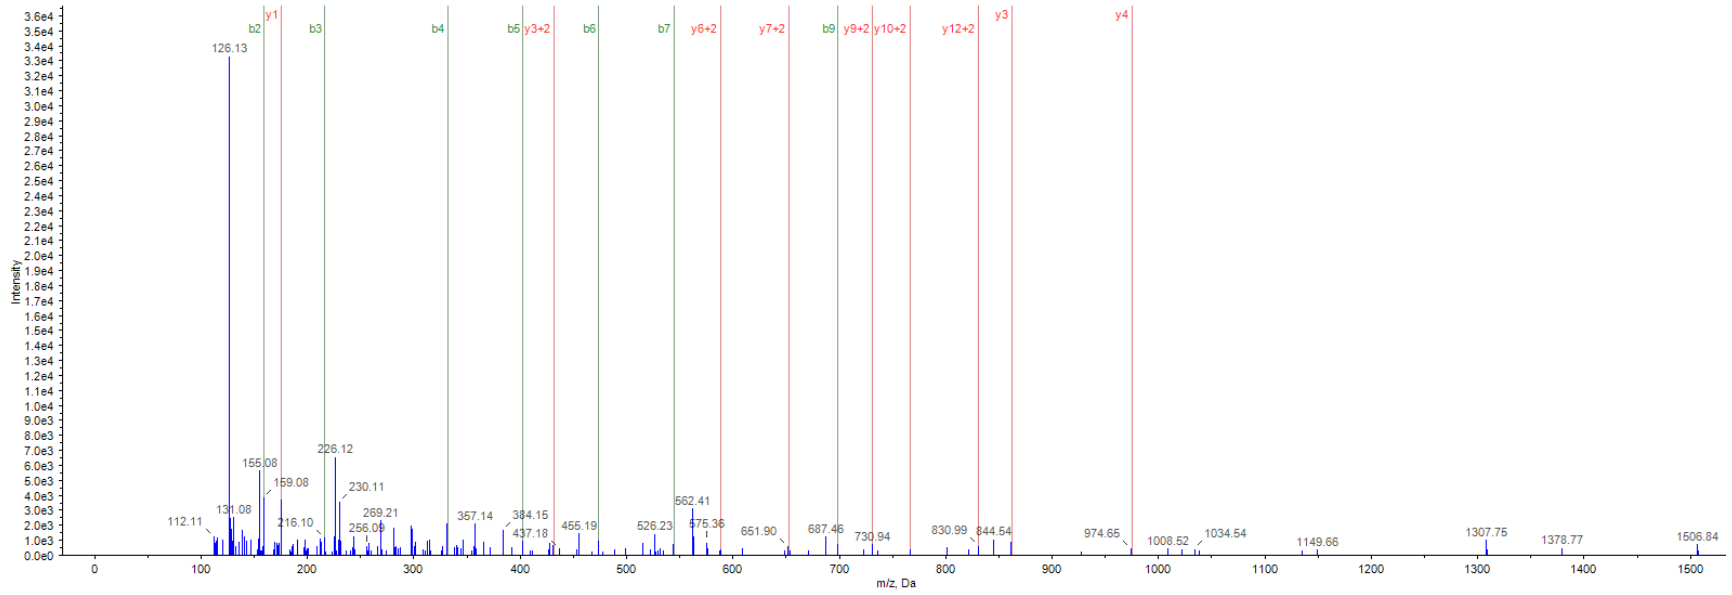

INQDEGVCIHTIPEGSIDNSPVK

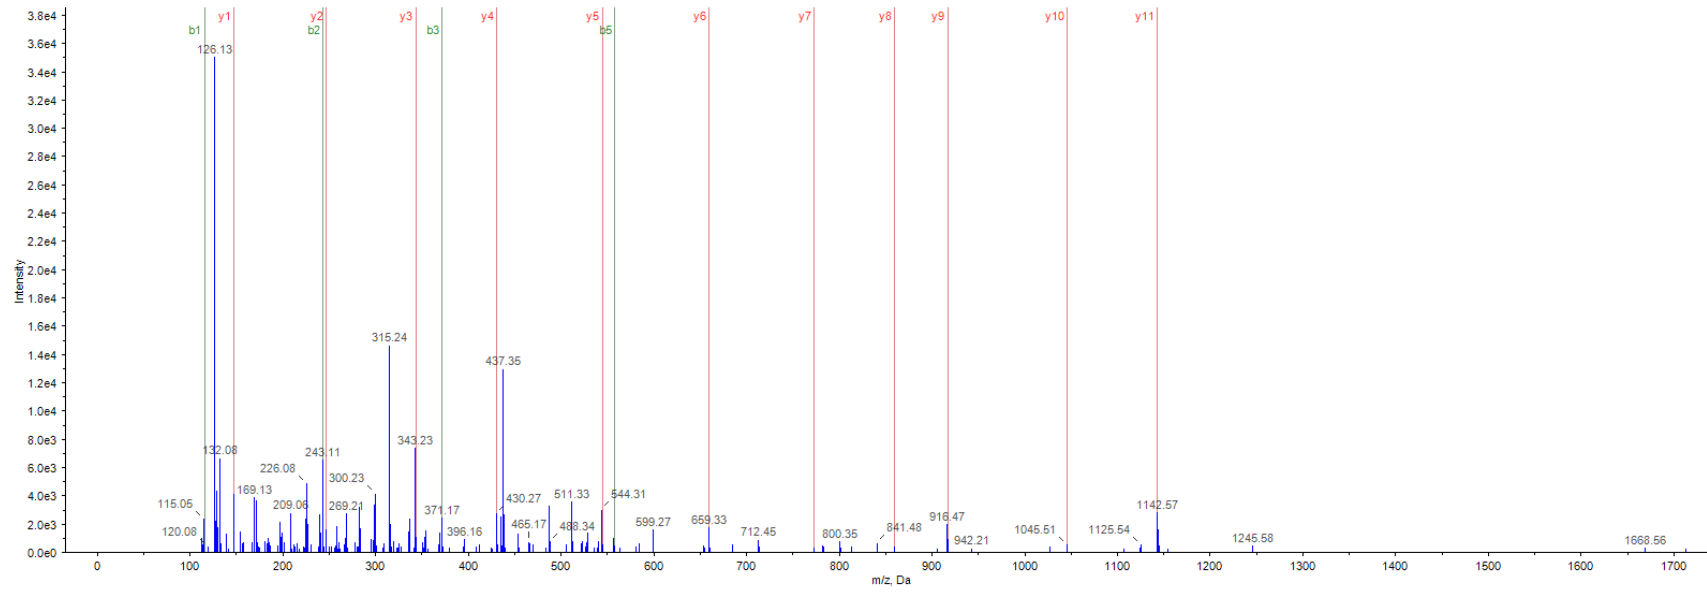

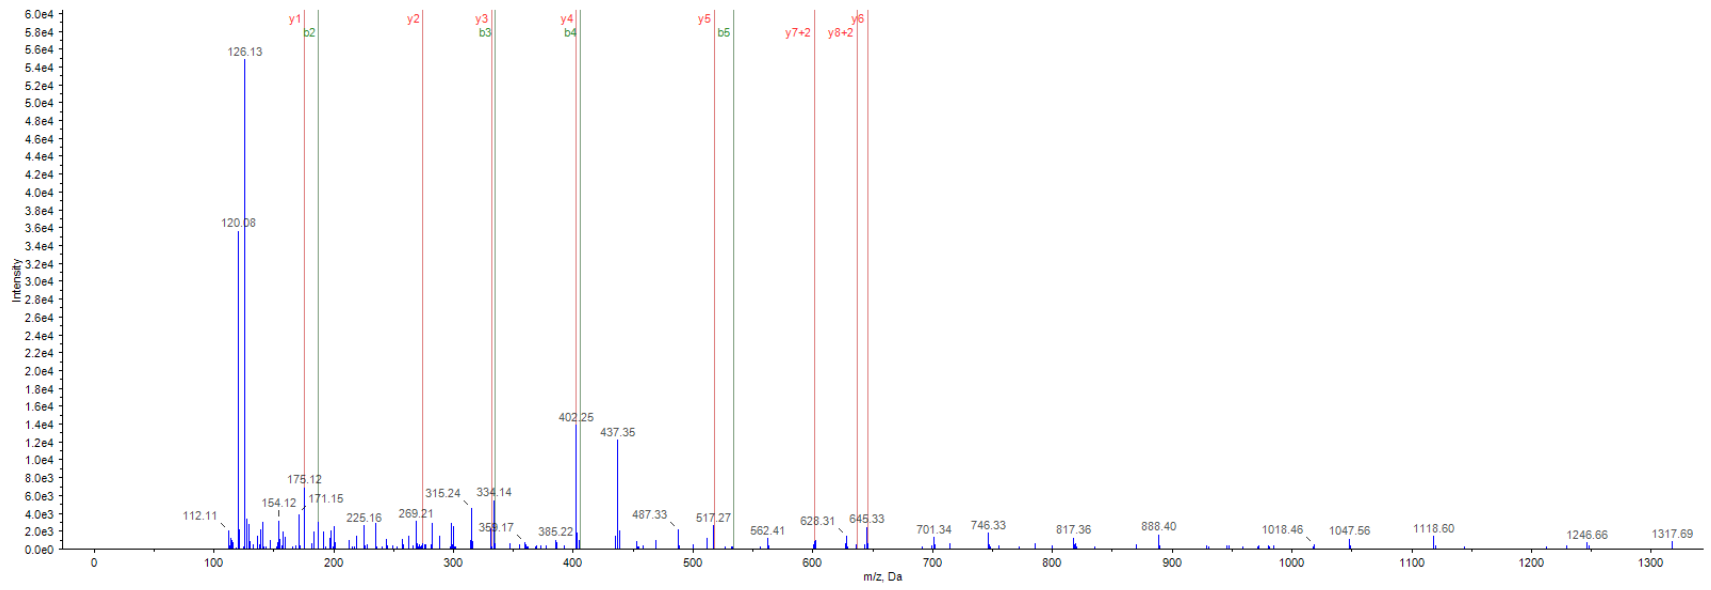

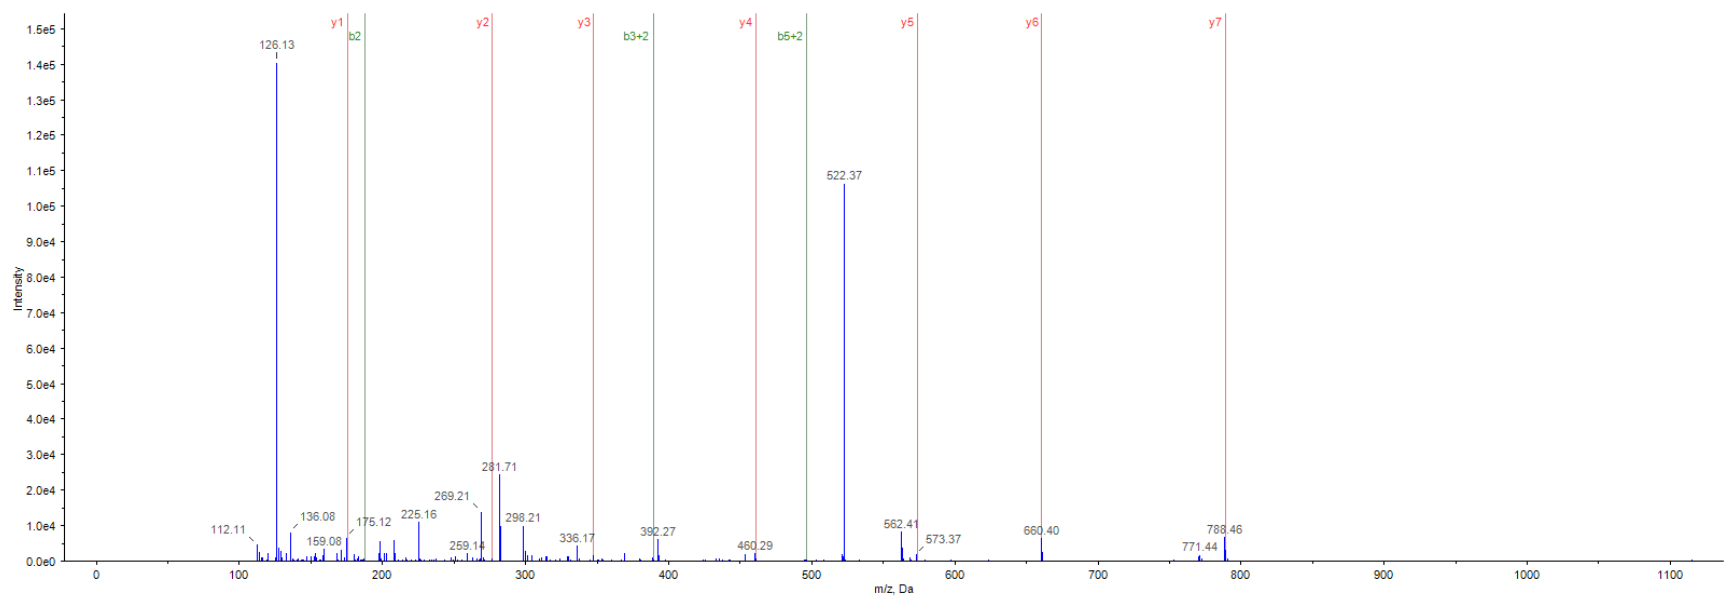

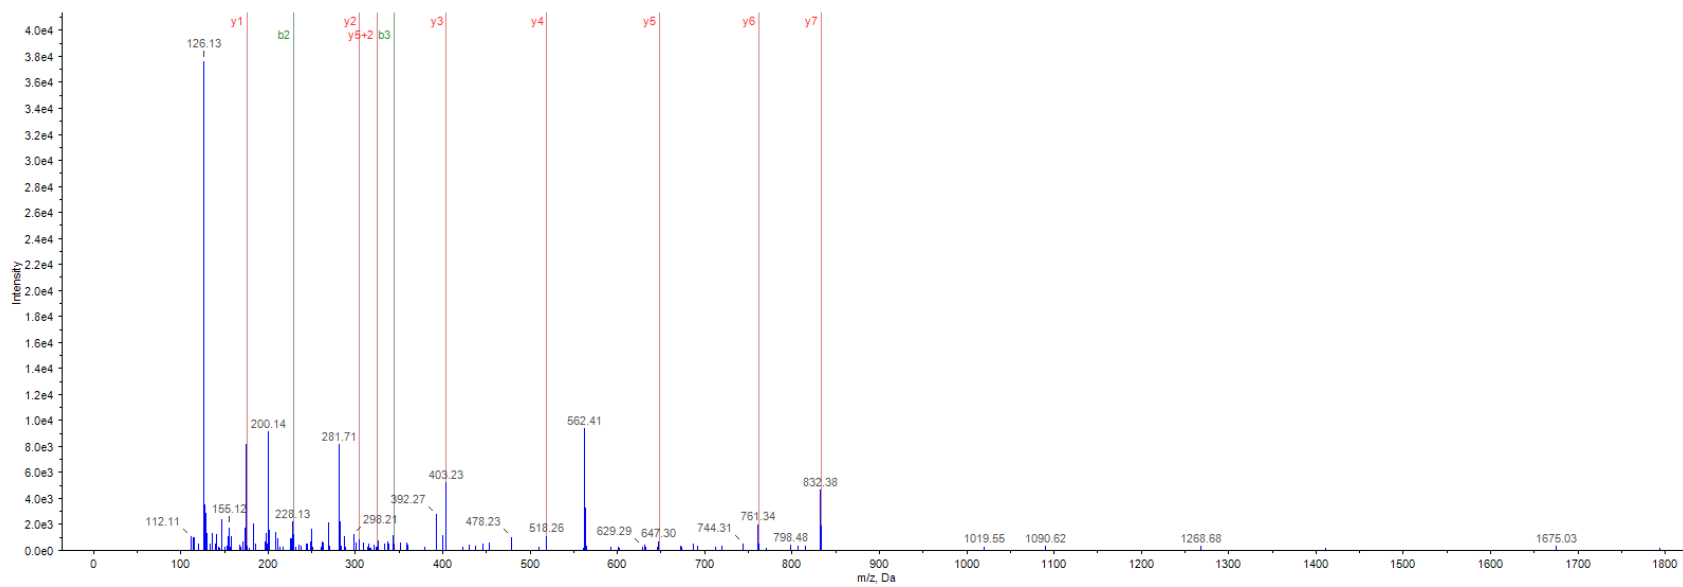

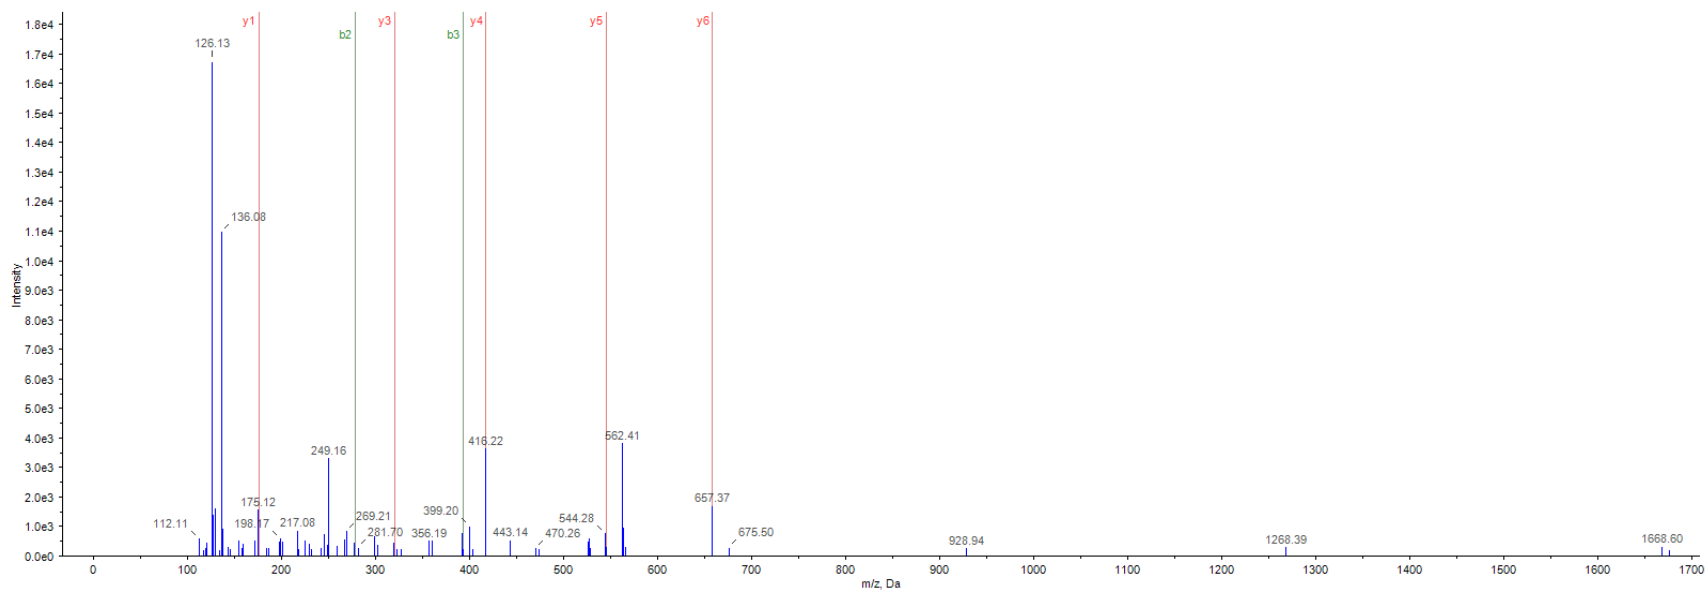

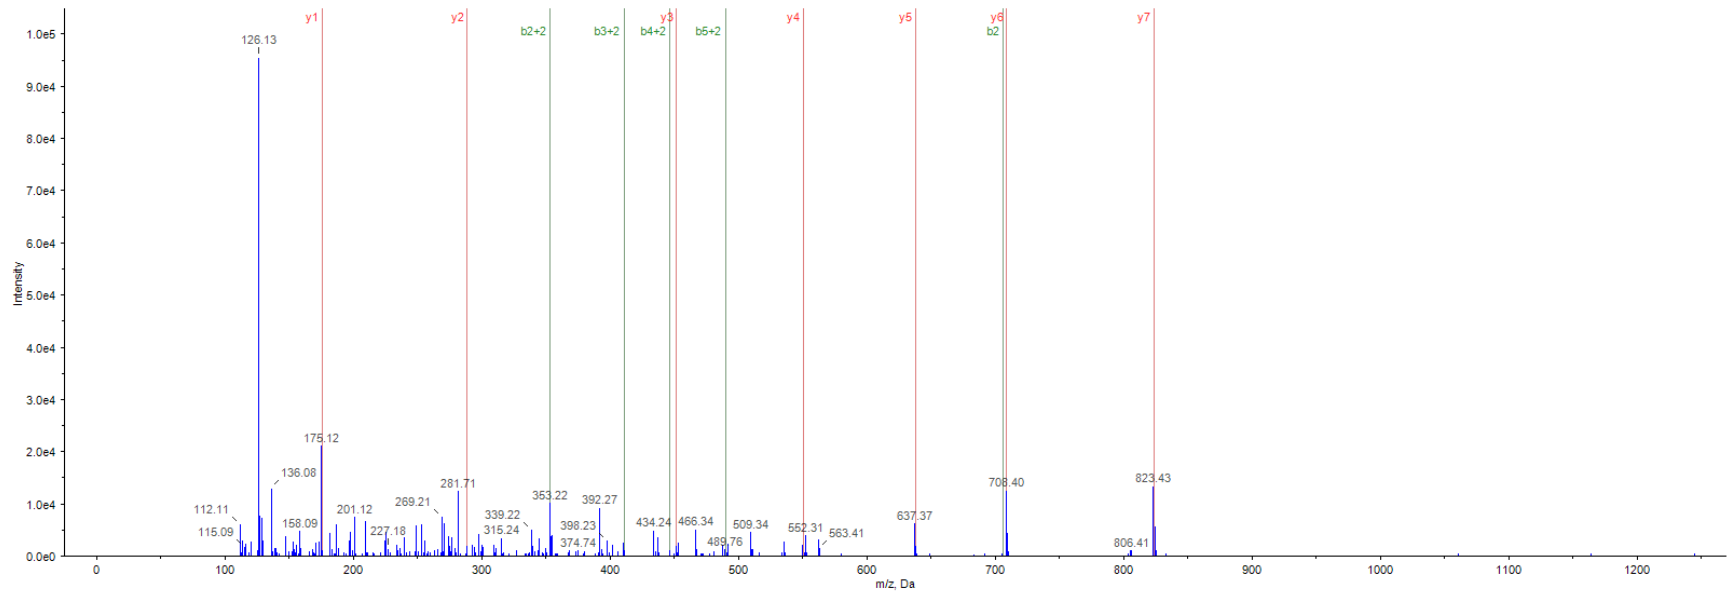



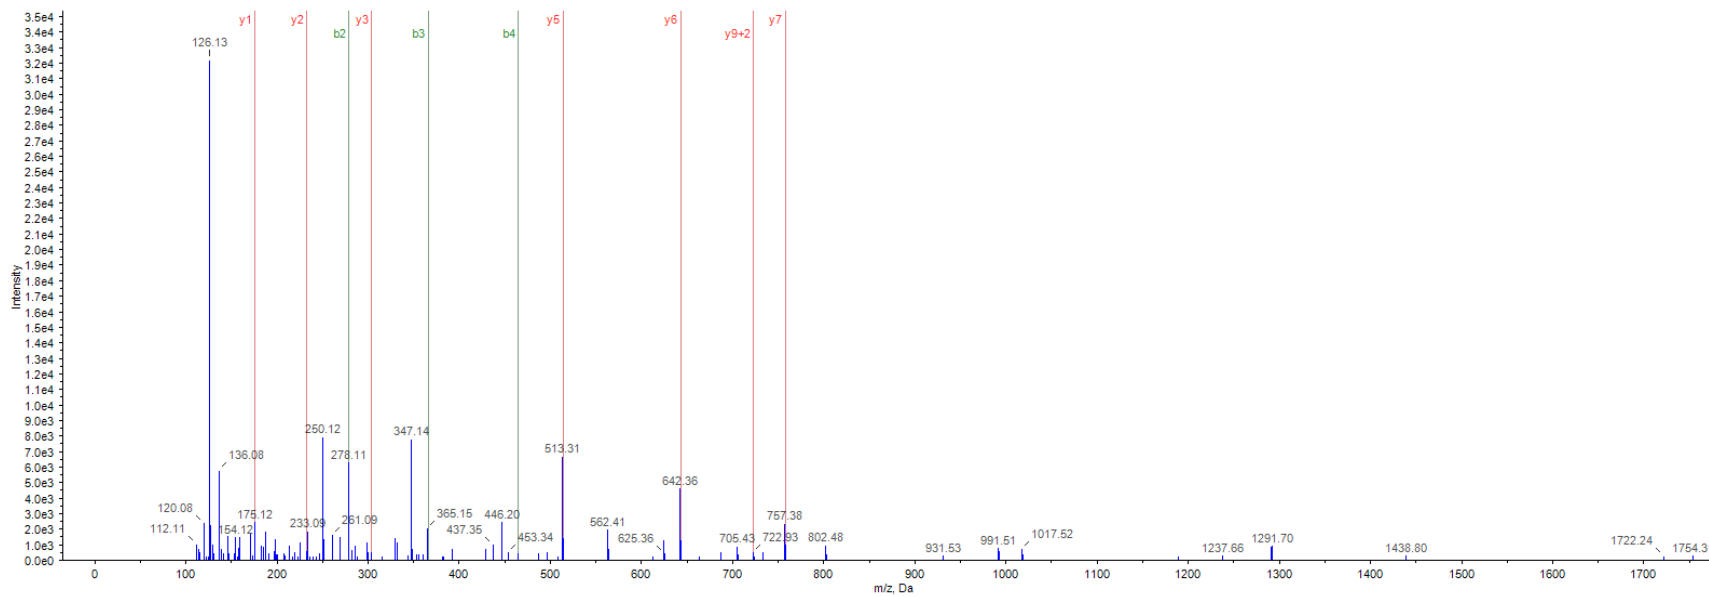

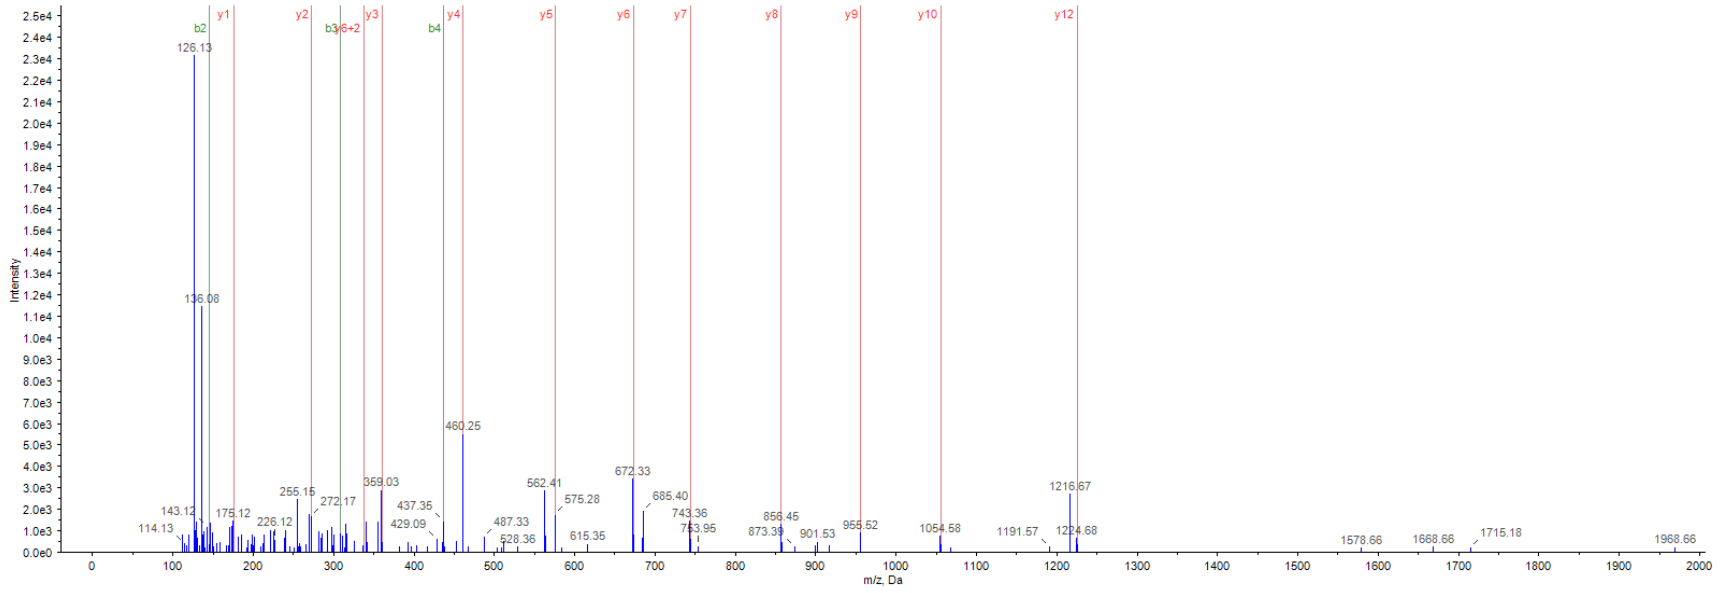

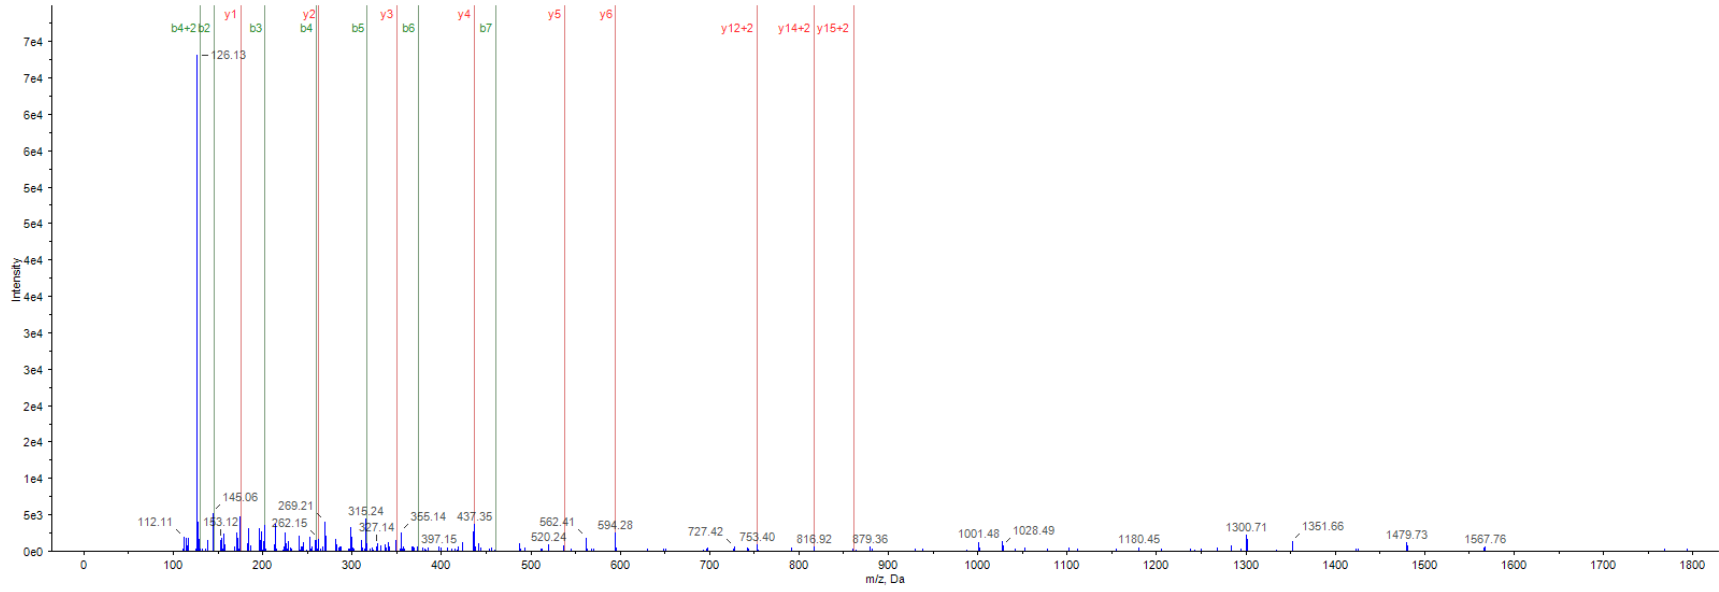

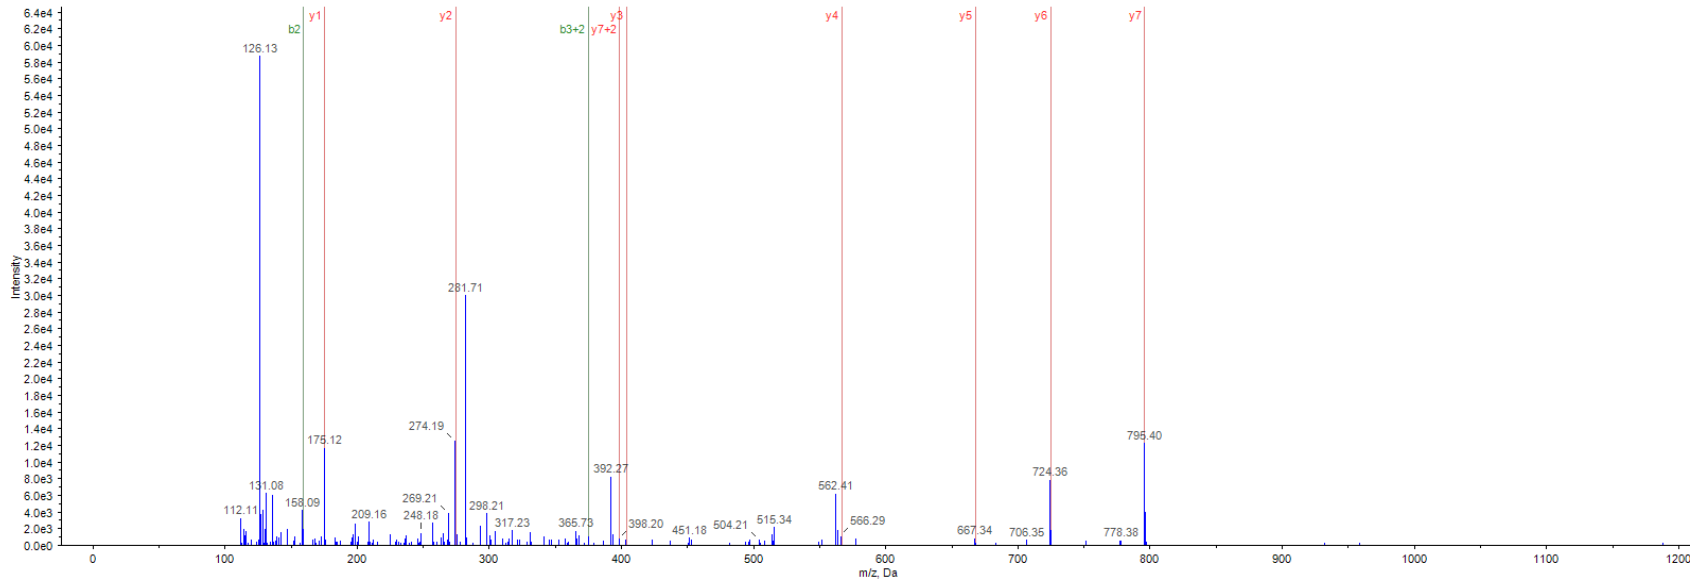

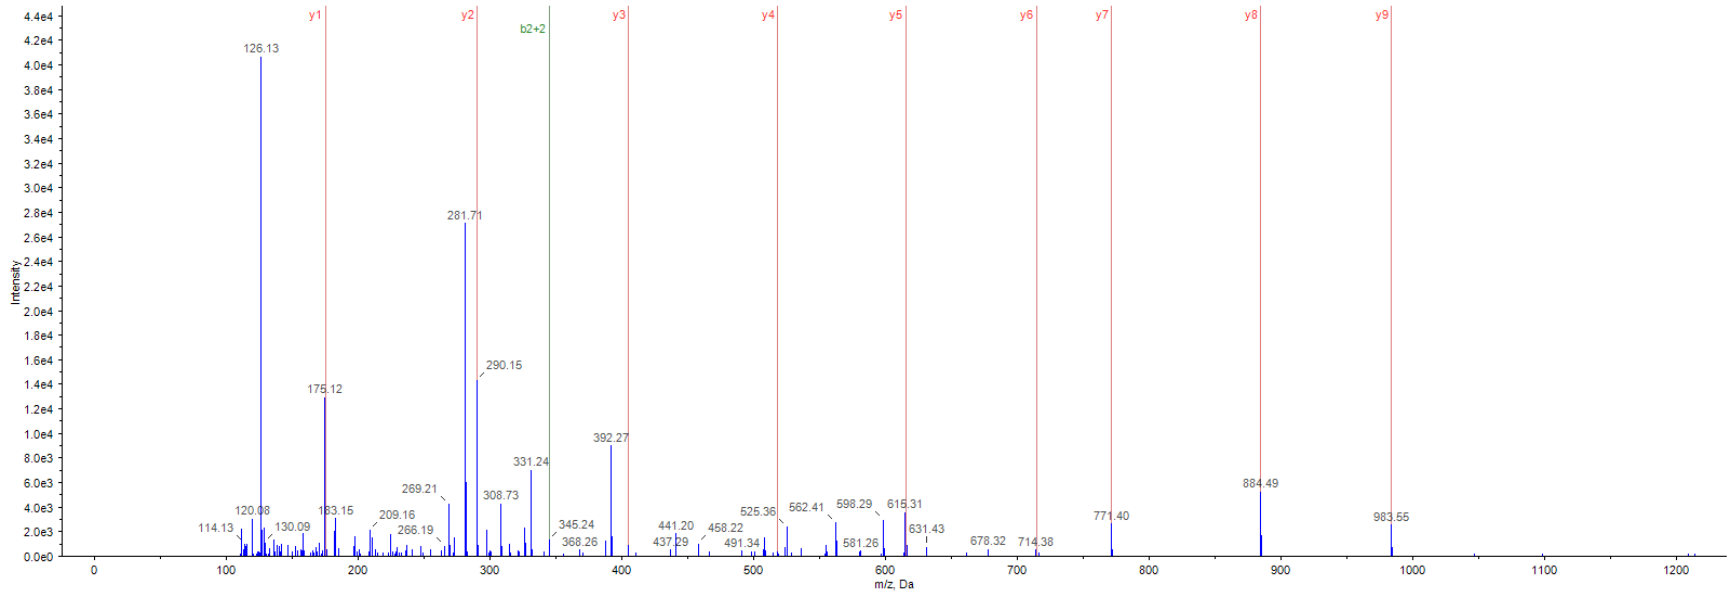

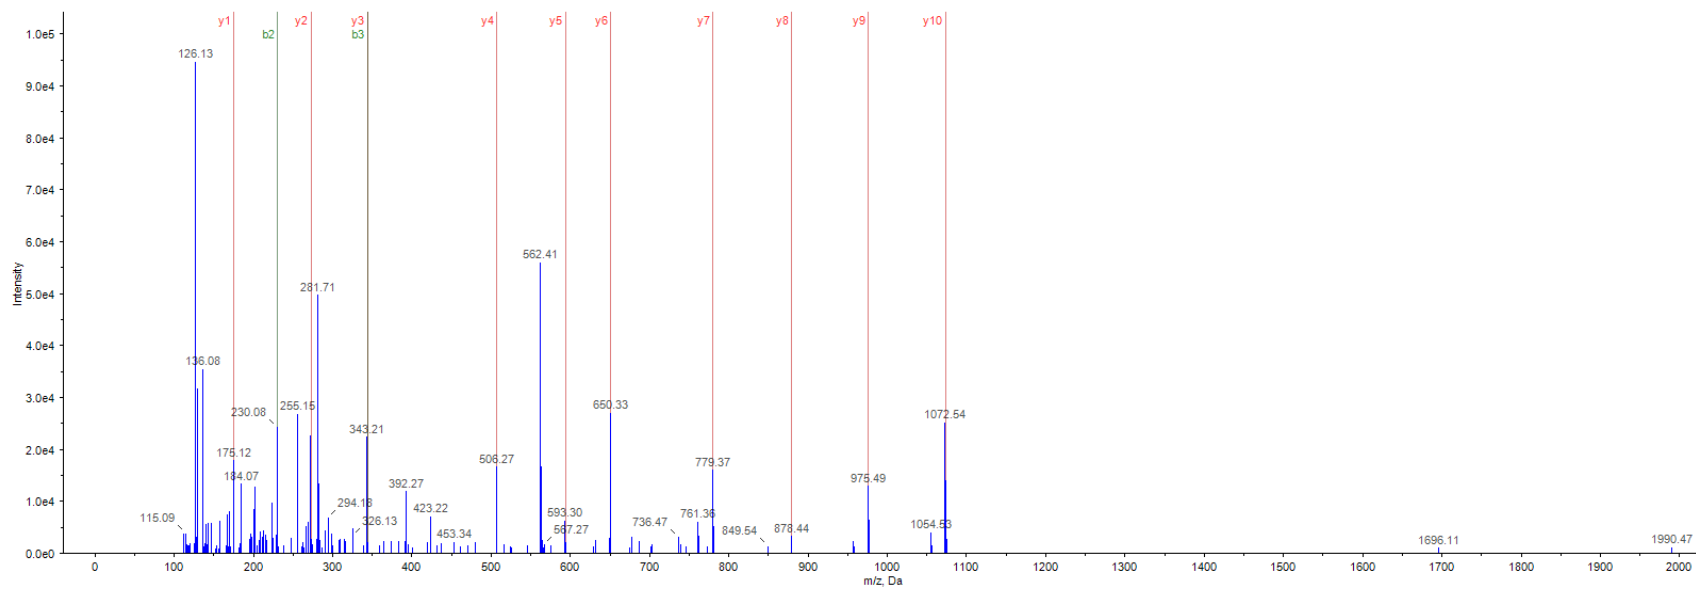

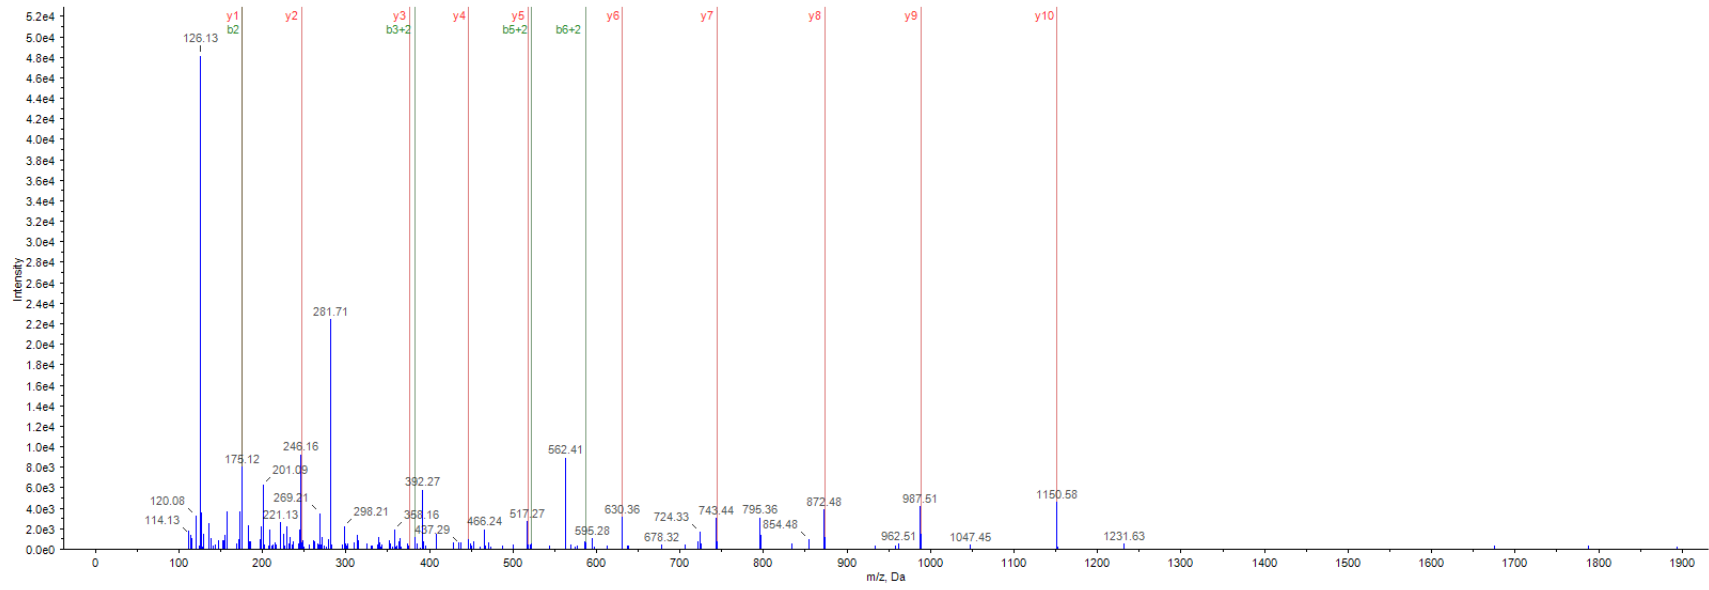

QAAAHHTPPDSEEQQR

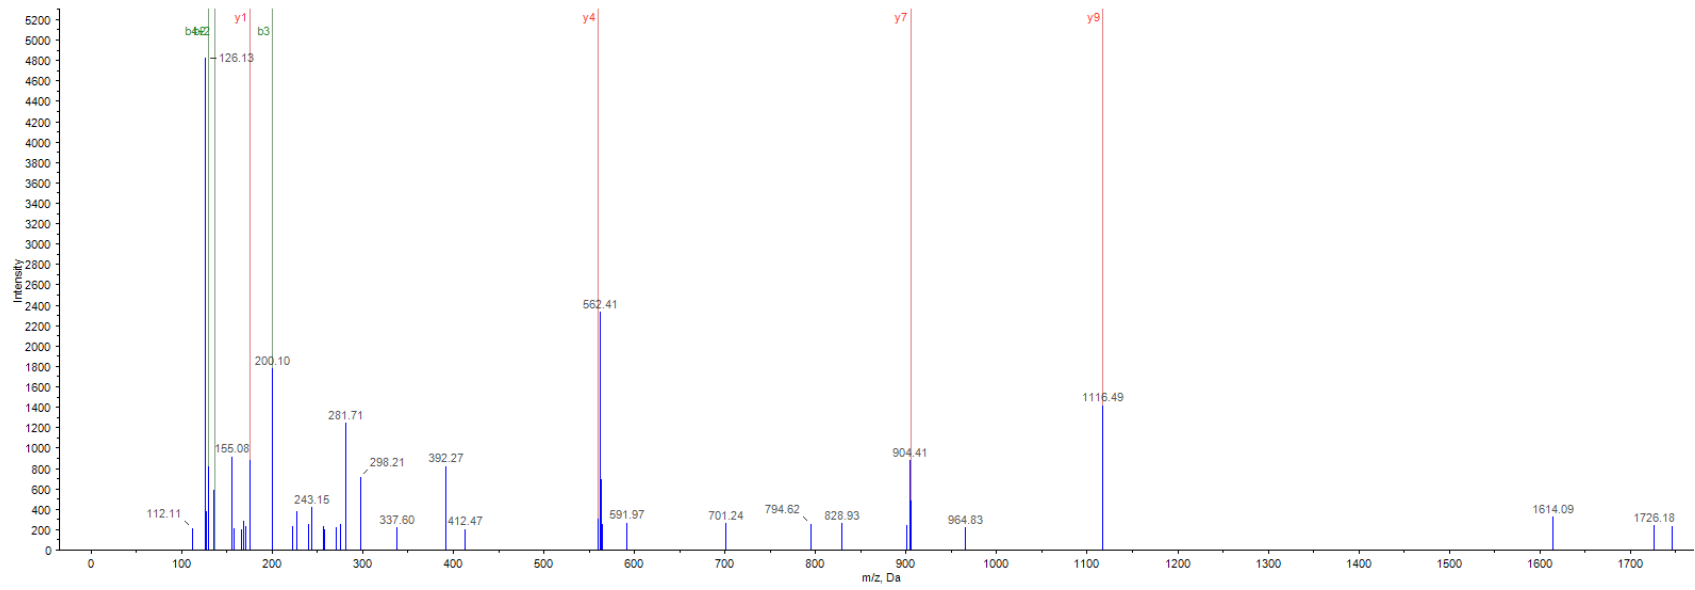



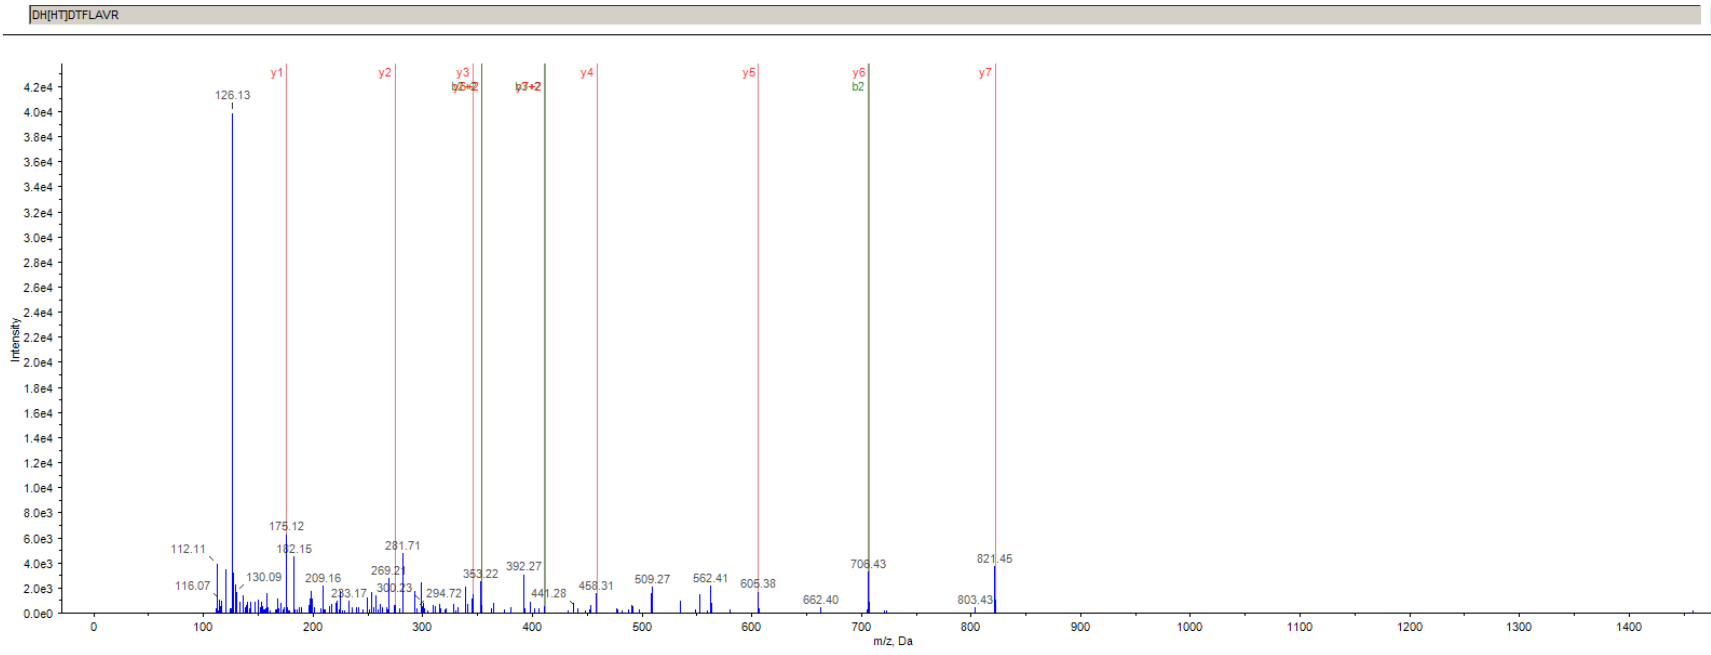

**Figure S-1.** Peptide sequence match spectra of aminoxyTMT labeled, HNE-modified peptides [HT] in HNE-treated liver mitochondria samples labeled with aminoxyTMT after enrichment with antiTMT resin
